# Supplementary material for: Converging Small Ubiquitin-like Modifier (SUMO) and Ubiquitin Signaling: Improved Methodology Identifies Co-modified Target Proteins
Source: PubMed Central journal article supplement (PMC5724187; doi:10.1074/mcp.tir117.000152), 2017-09-26

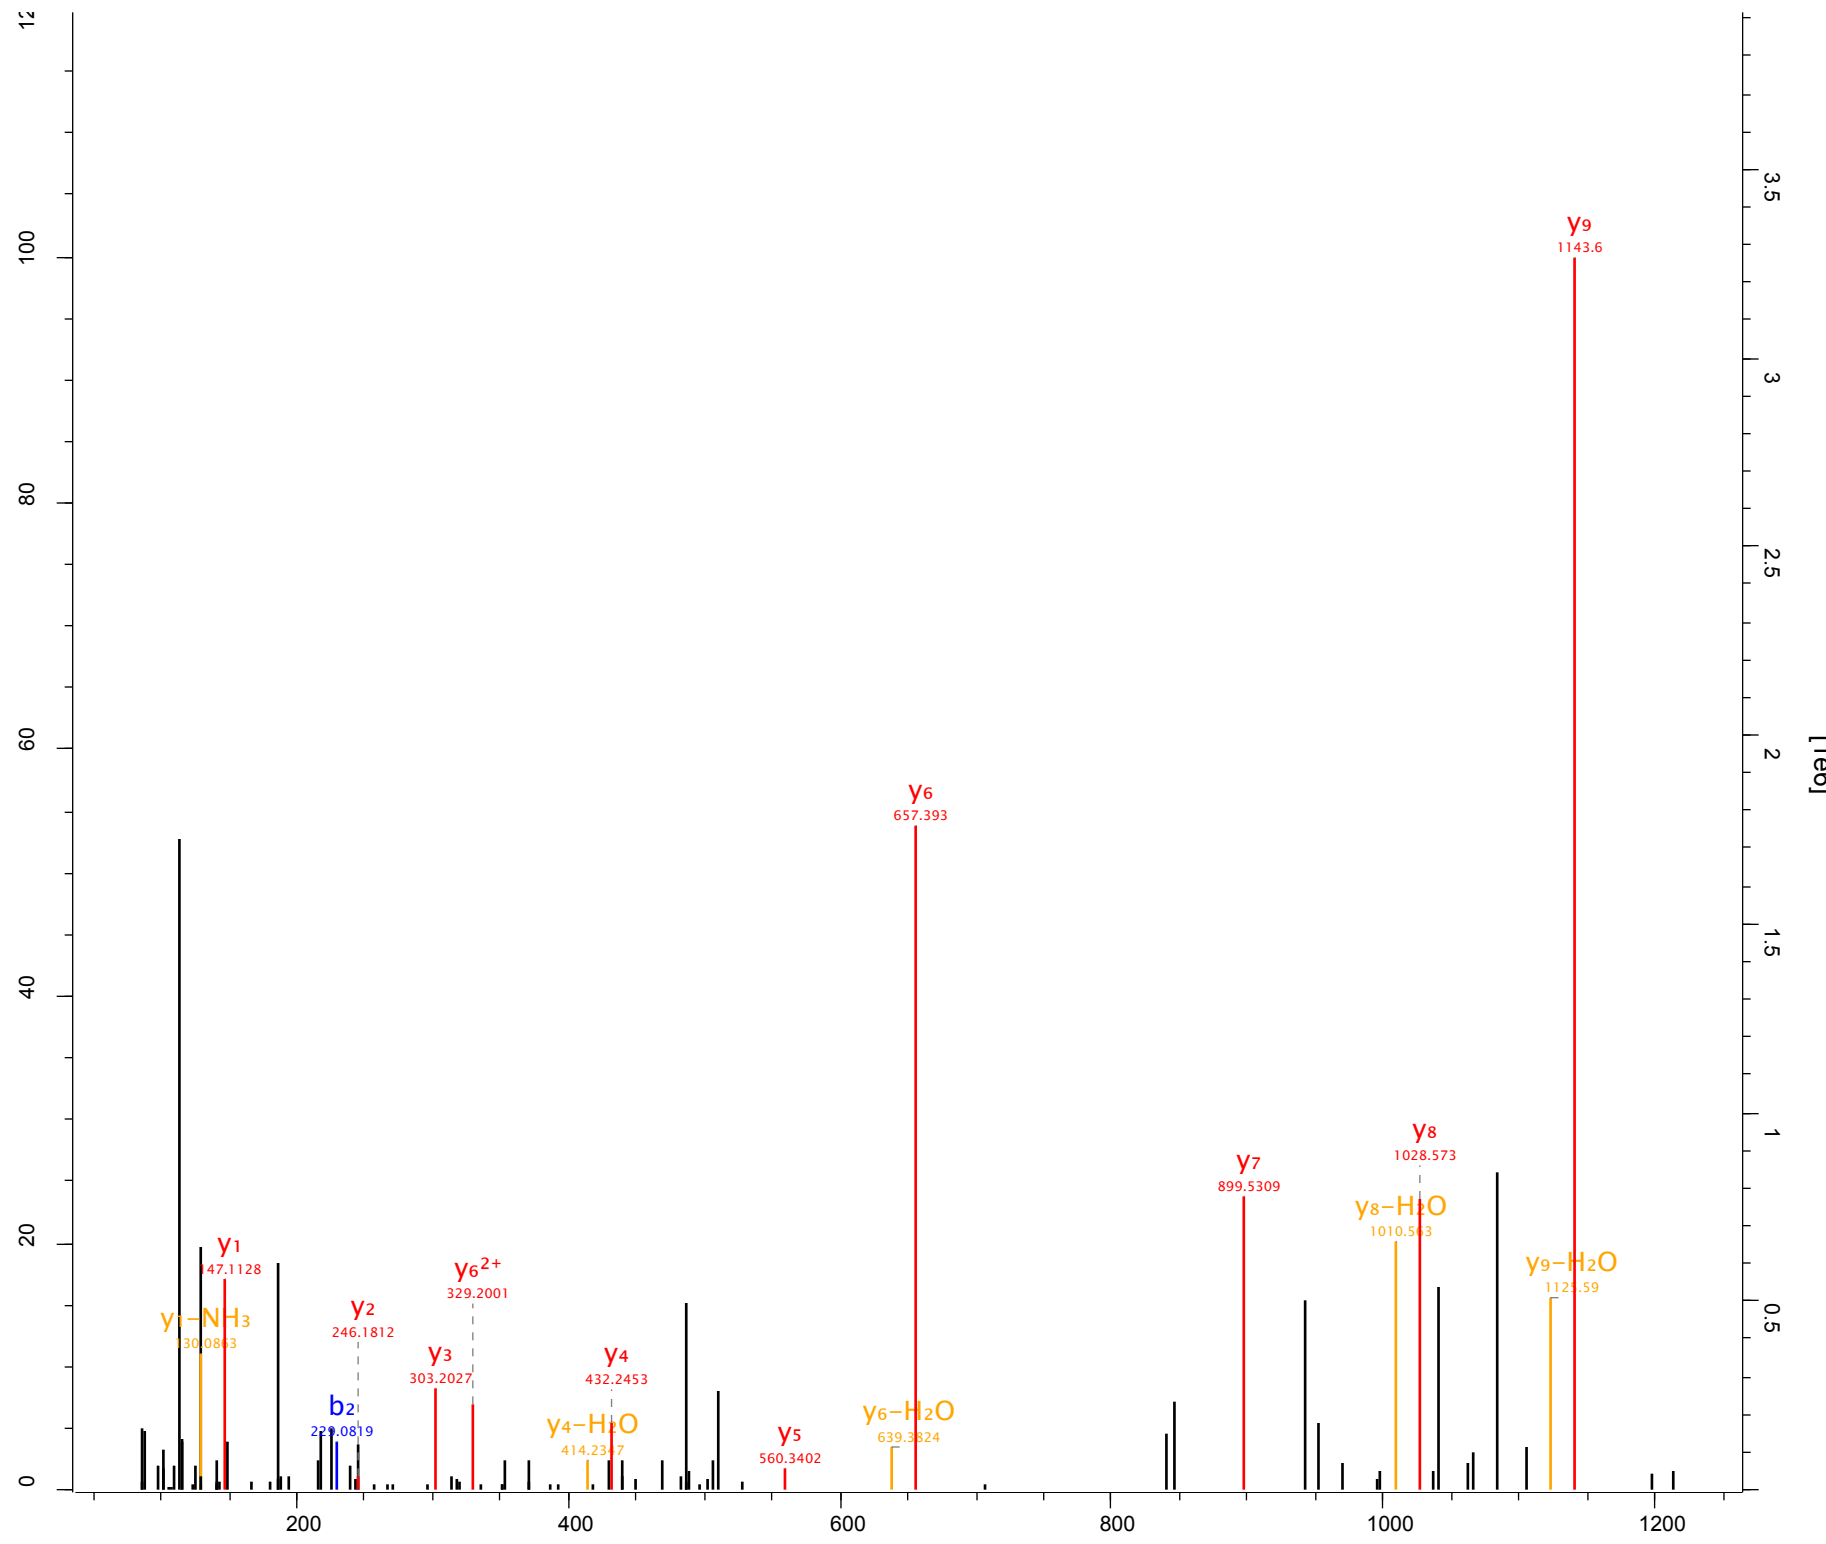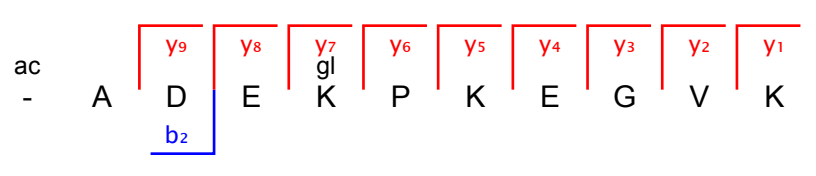

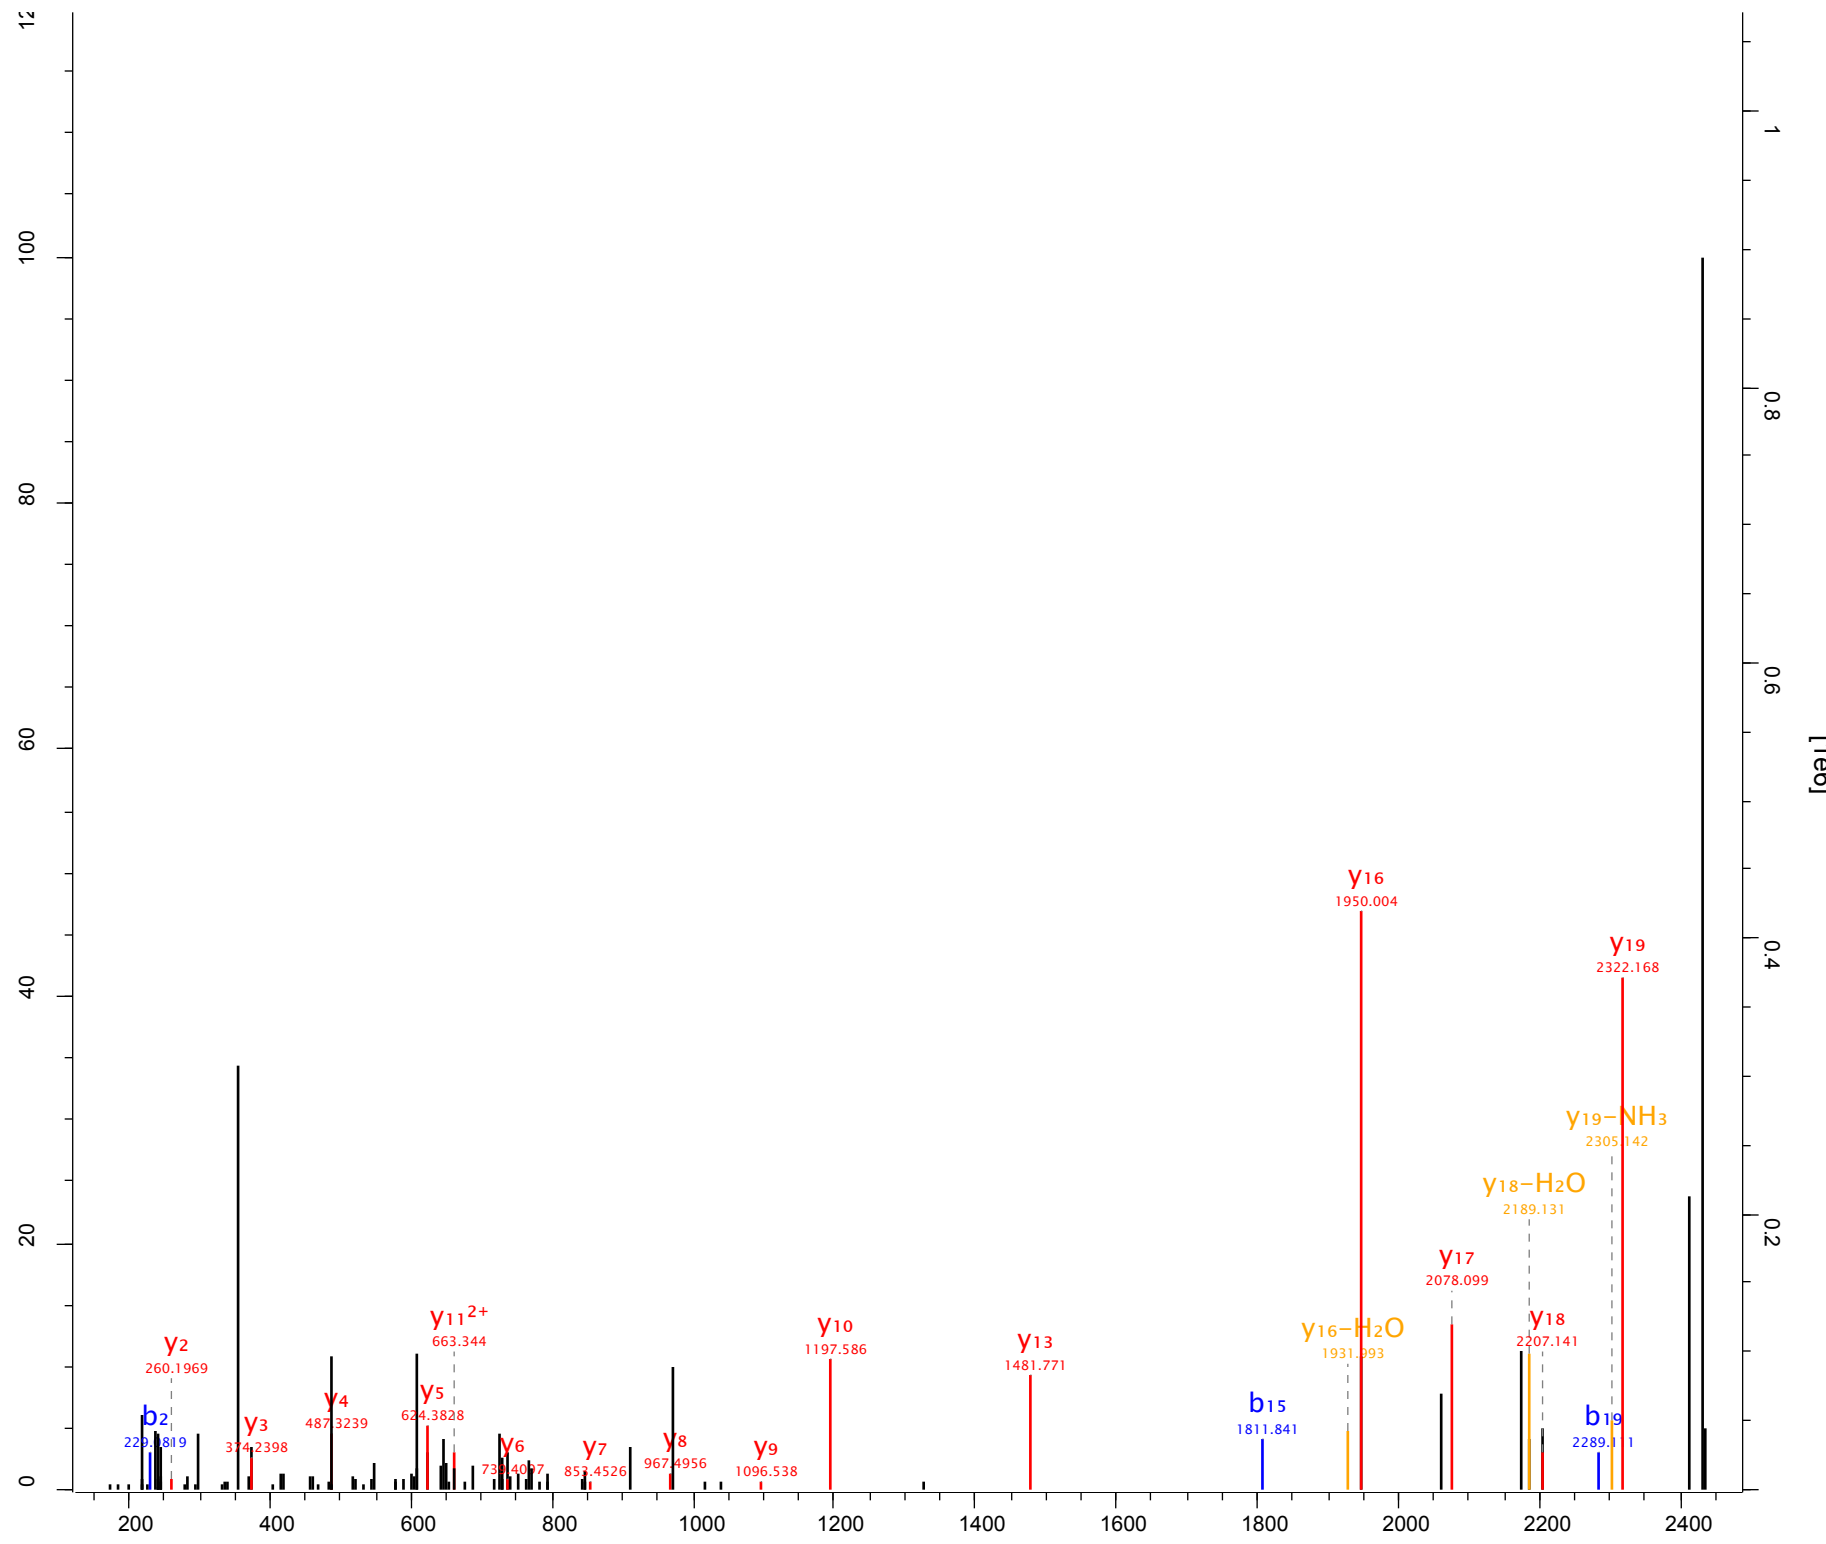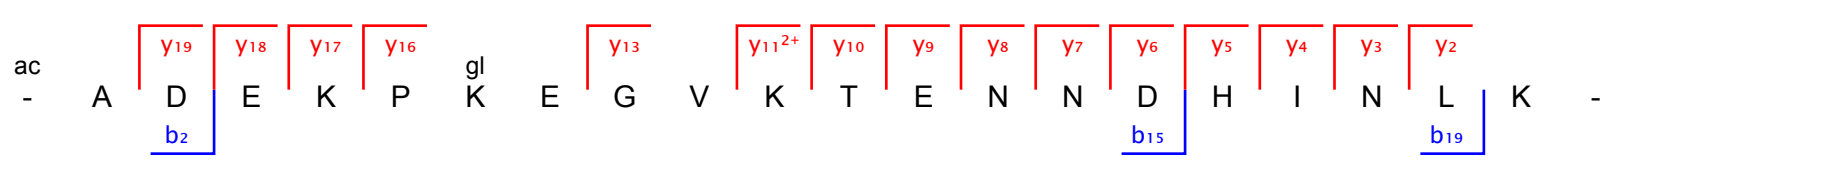

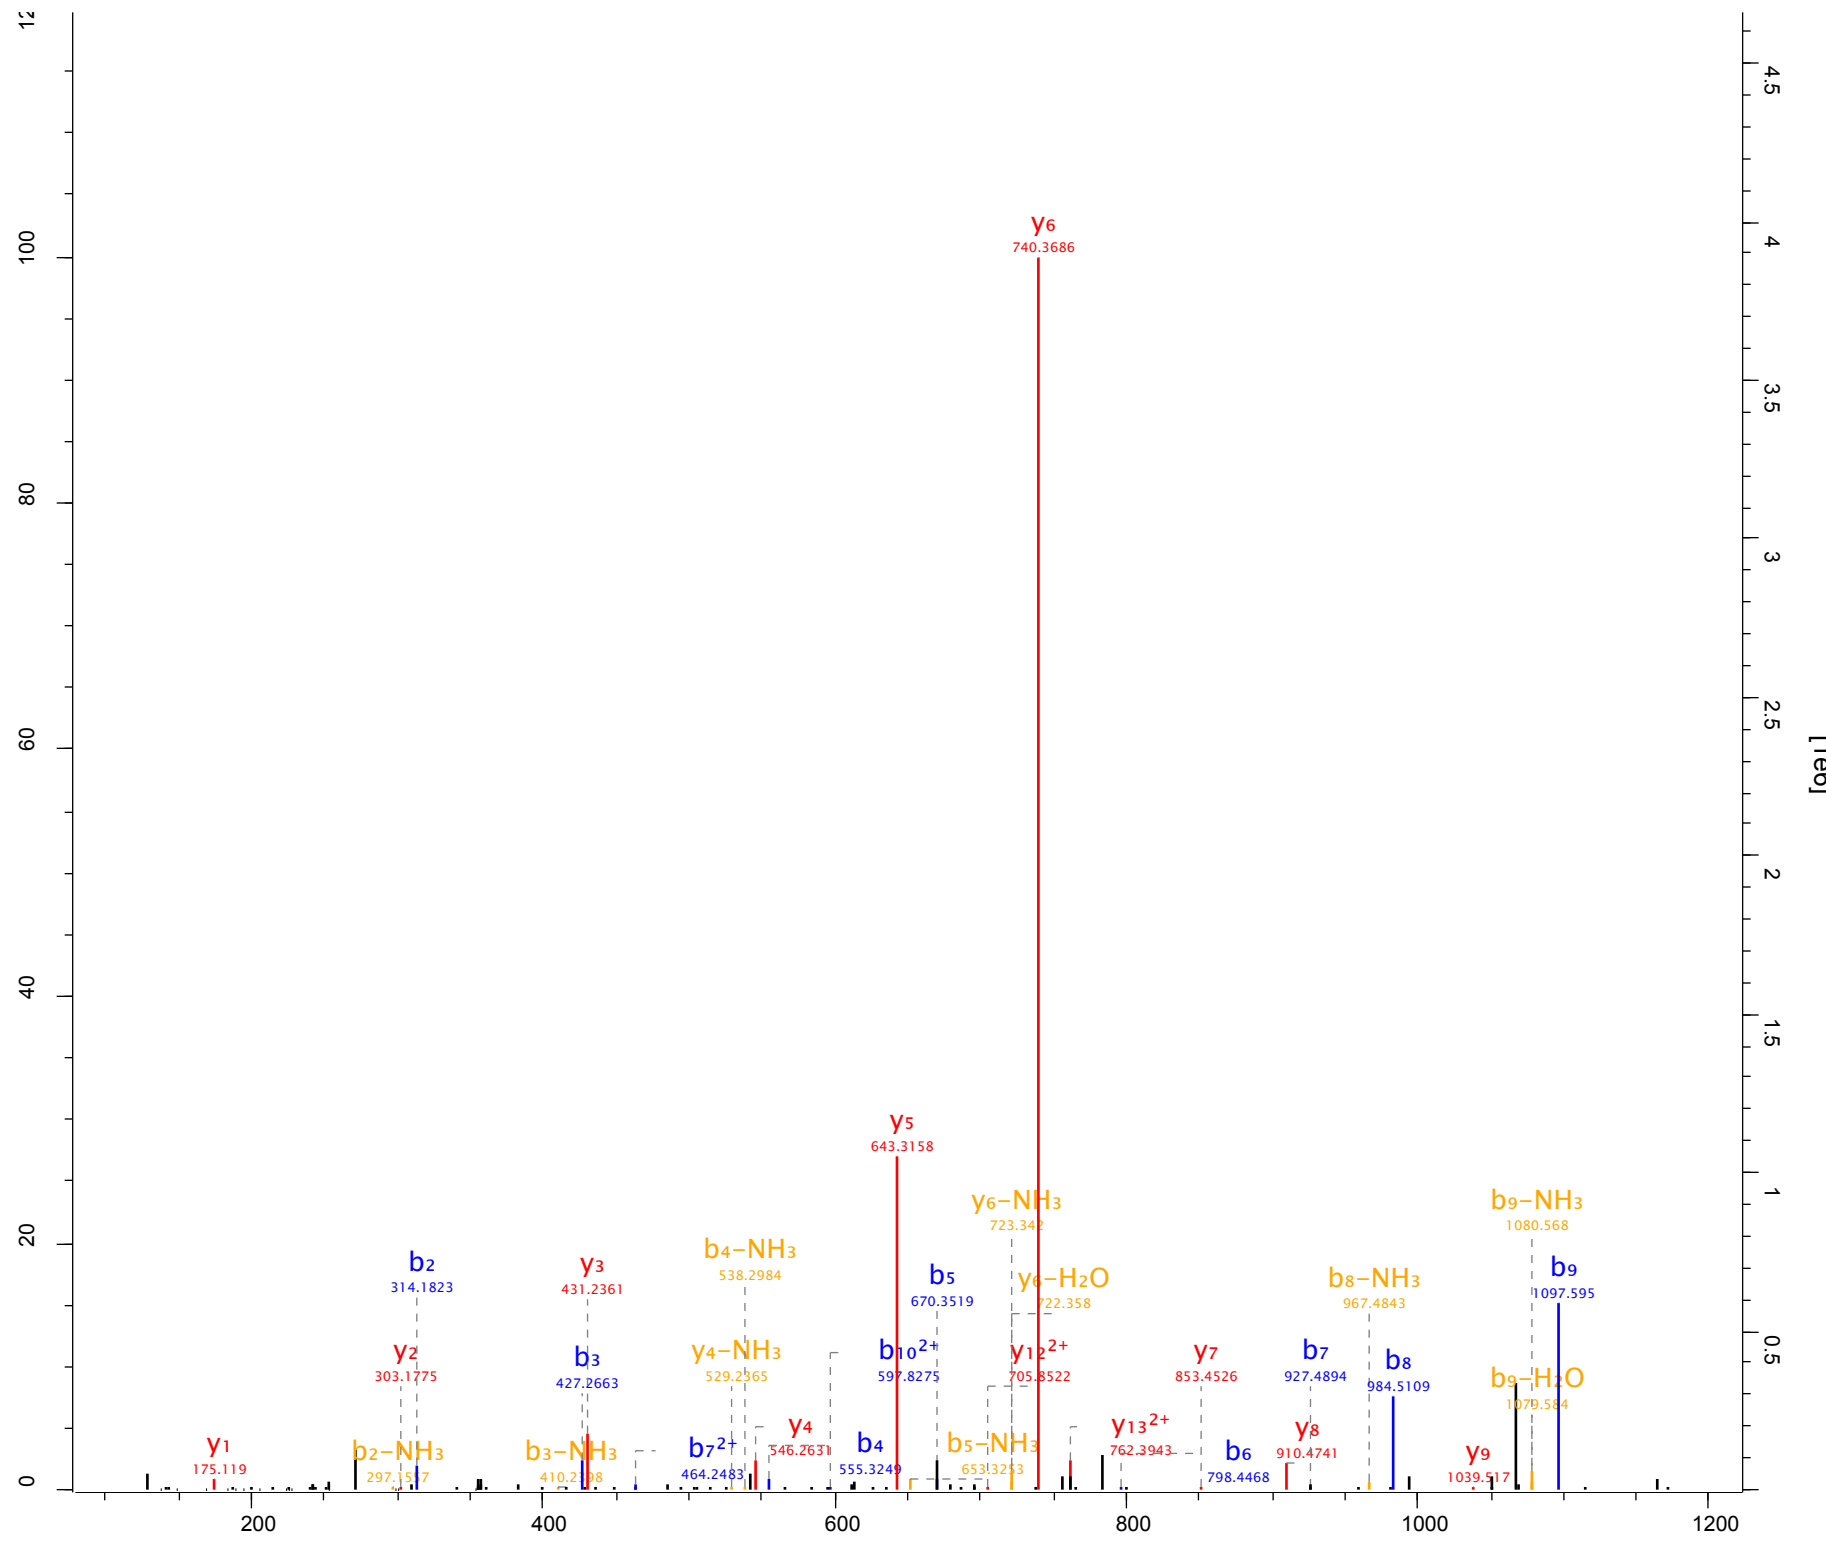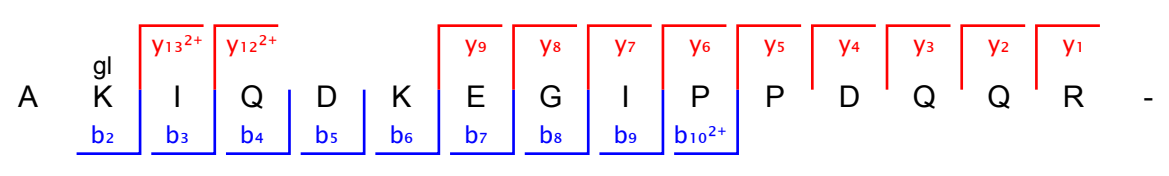

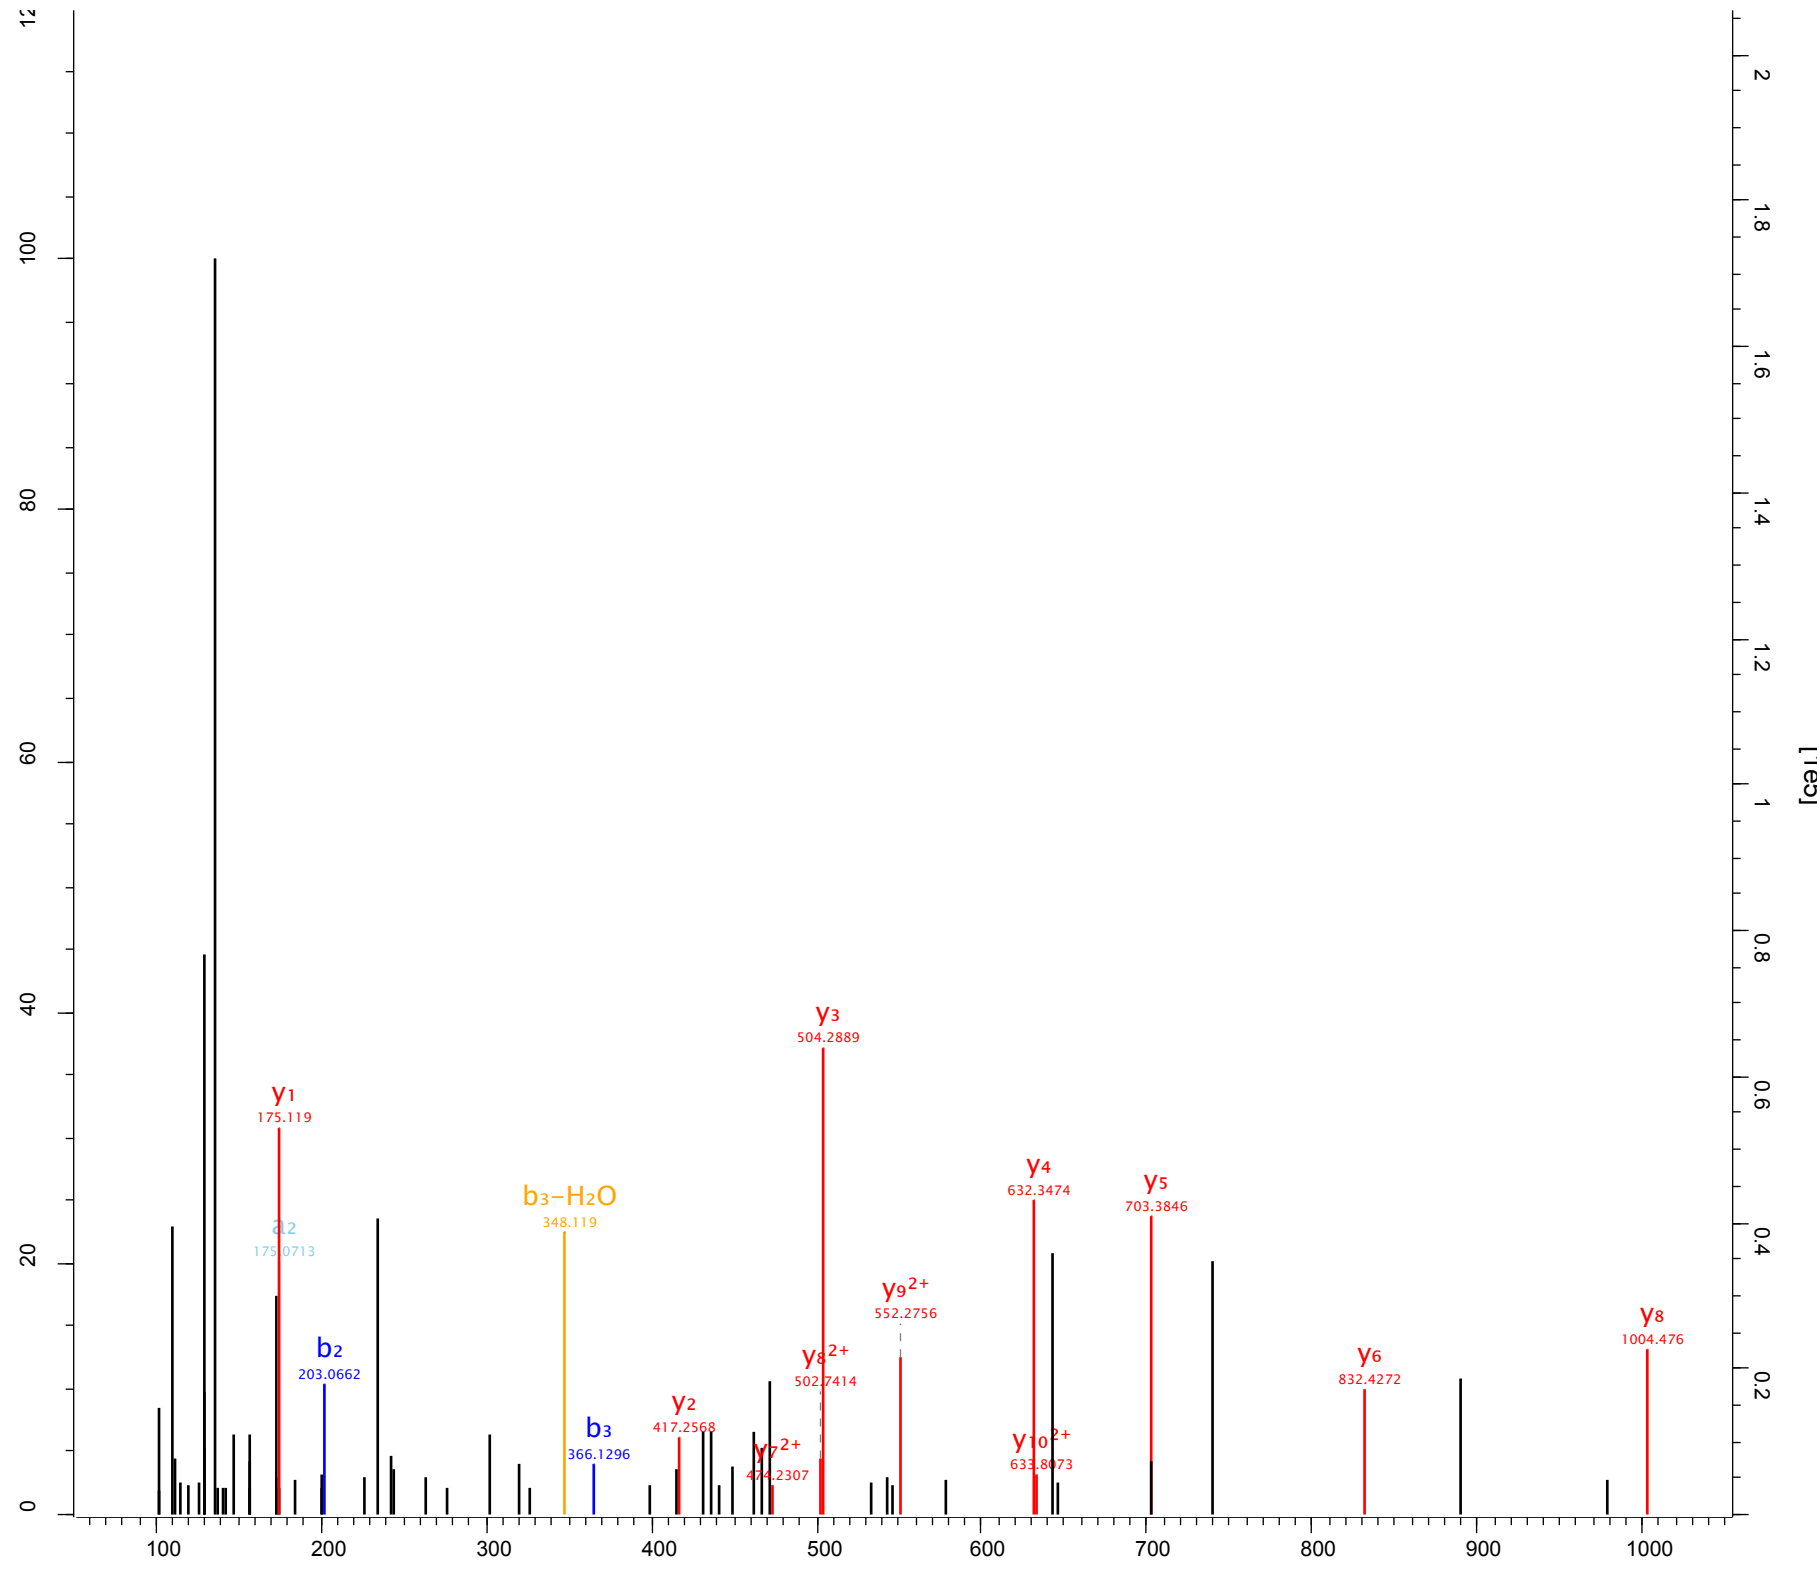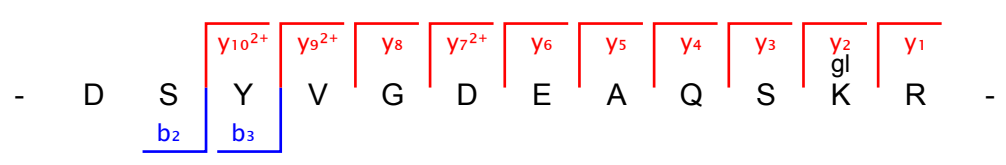

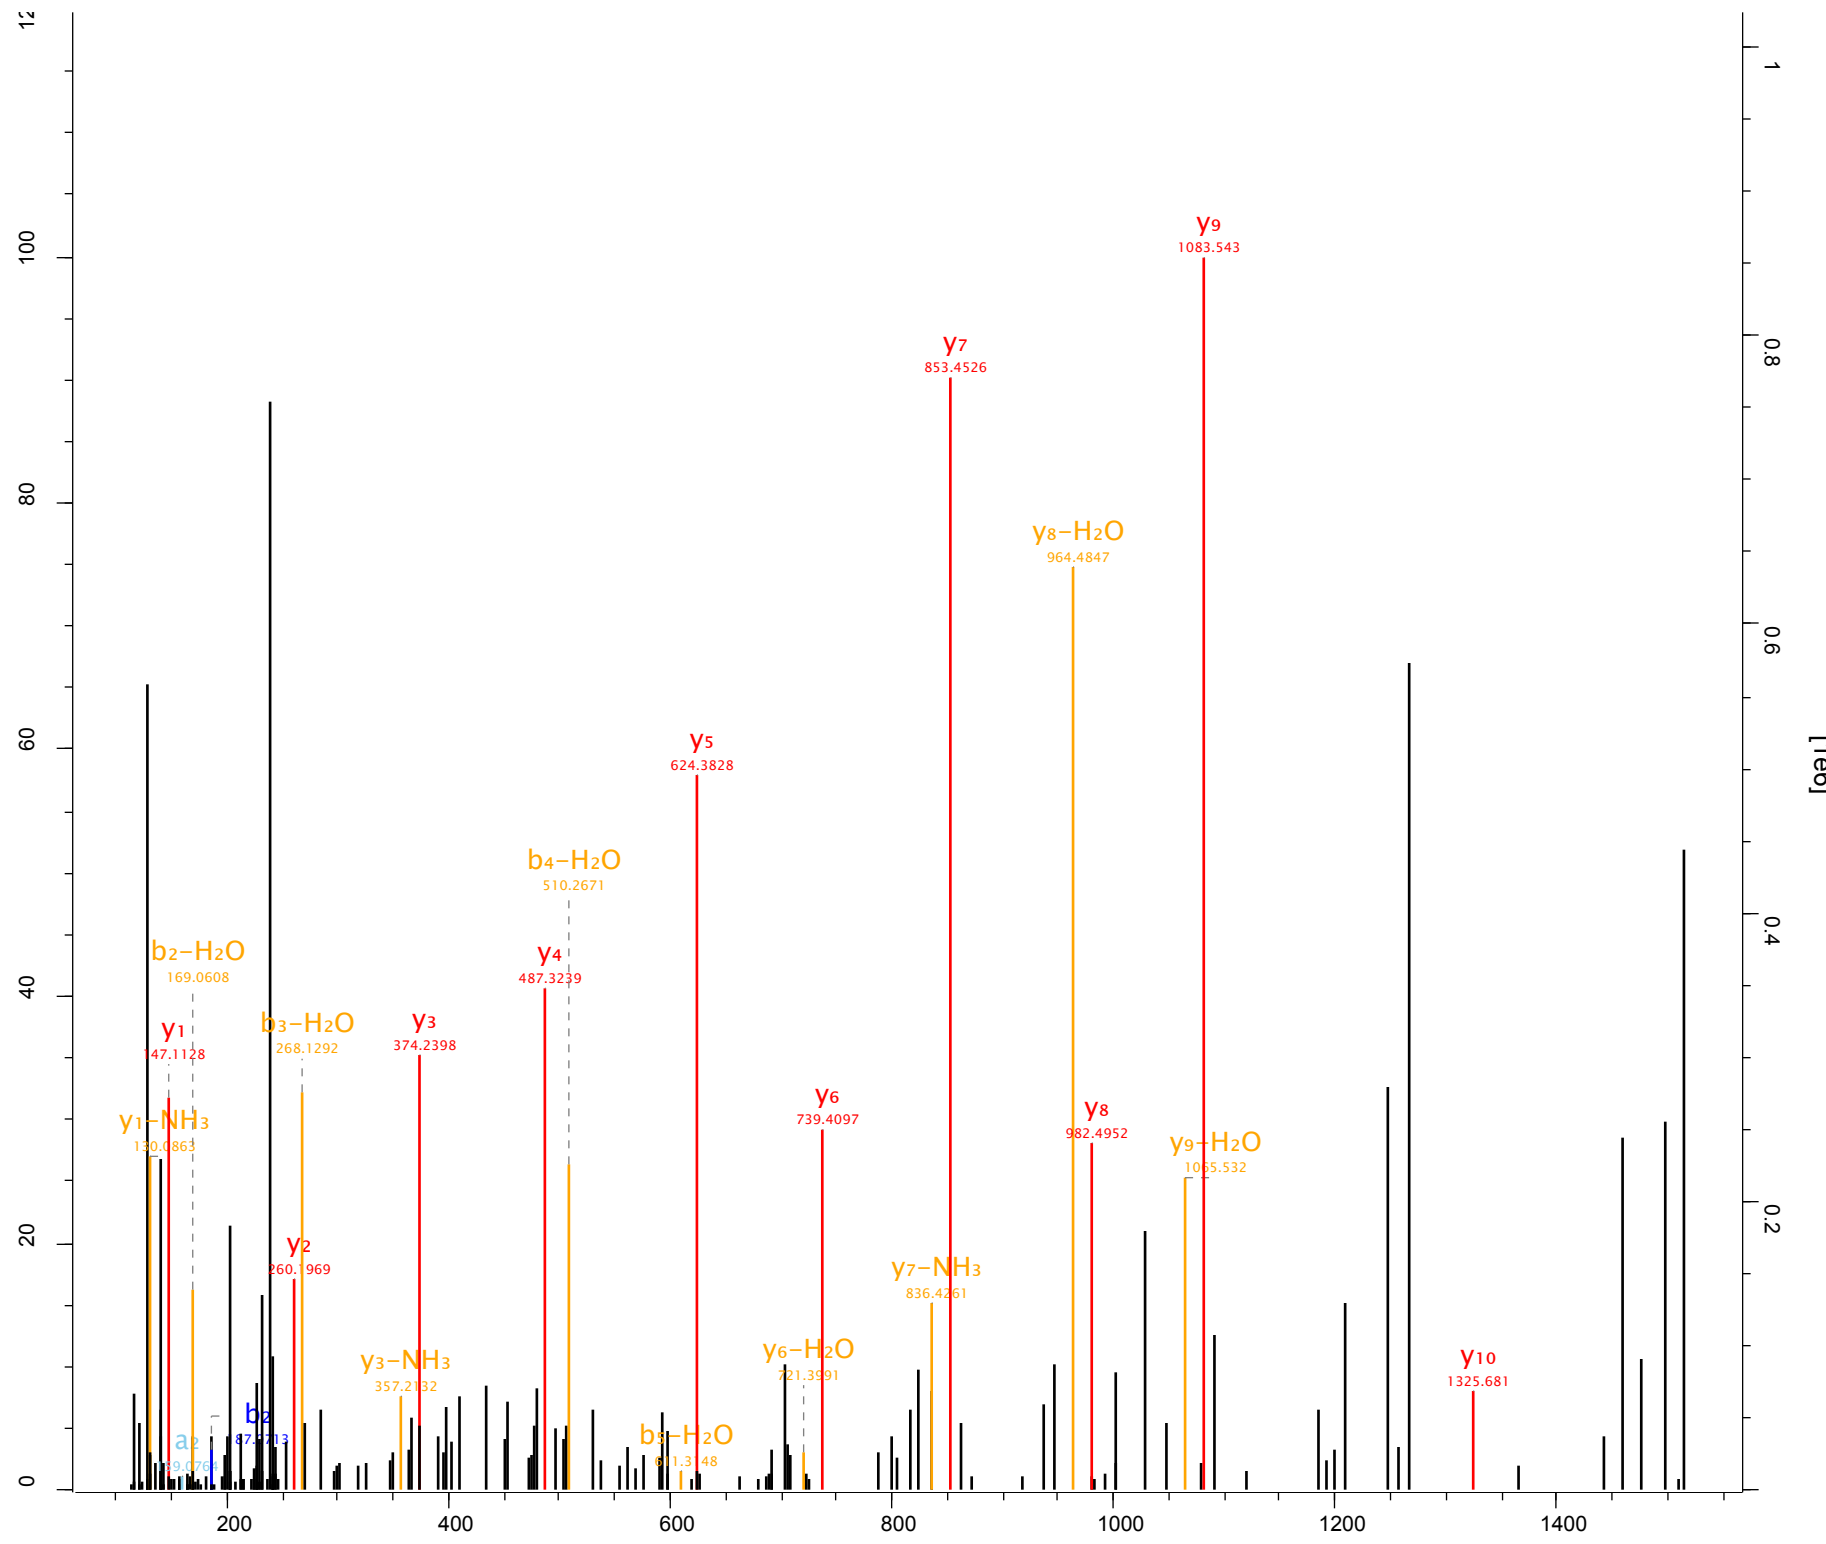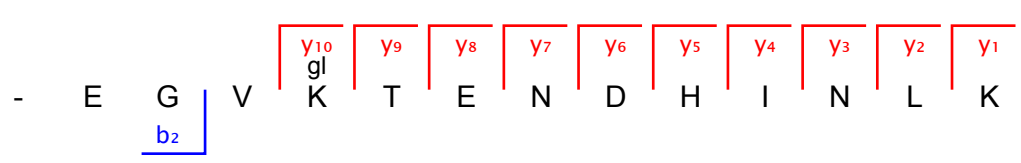

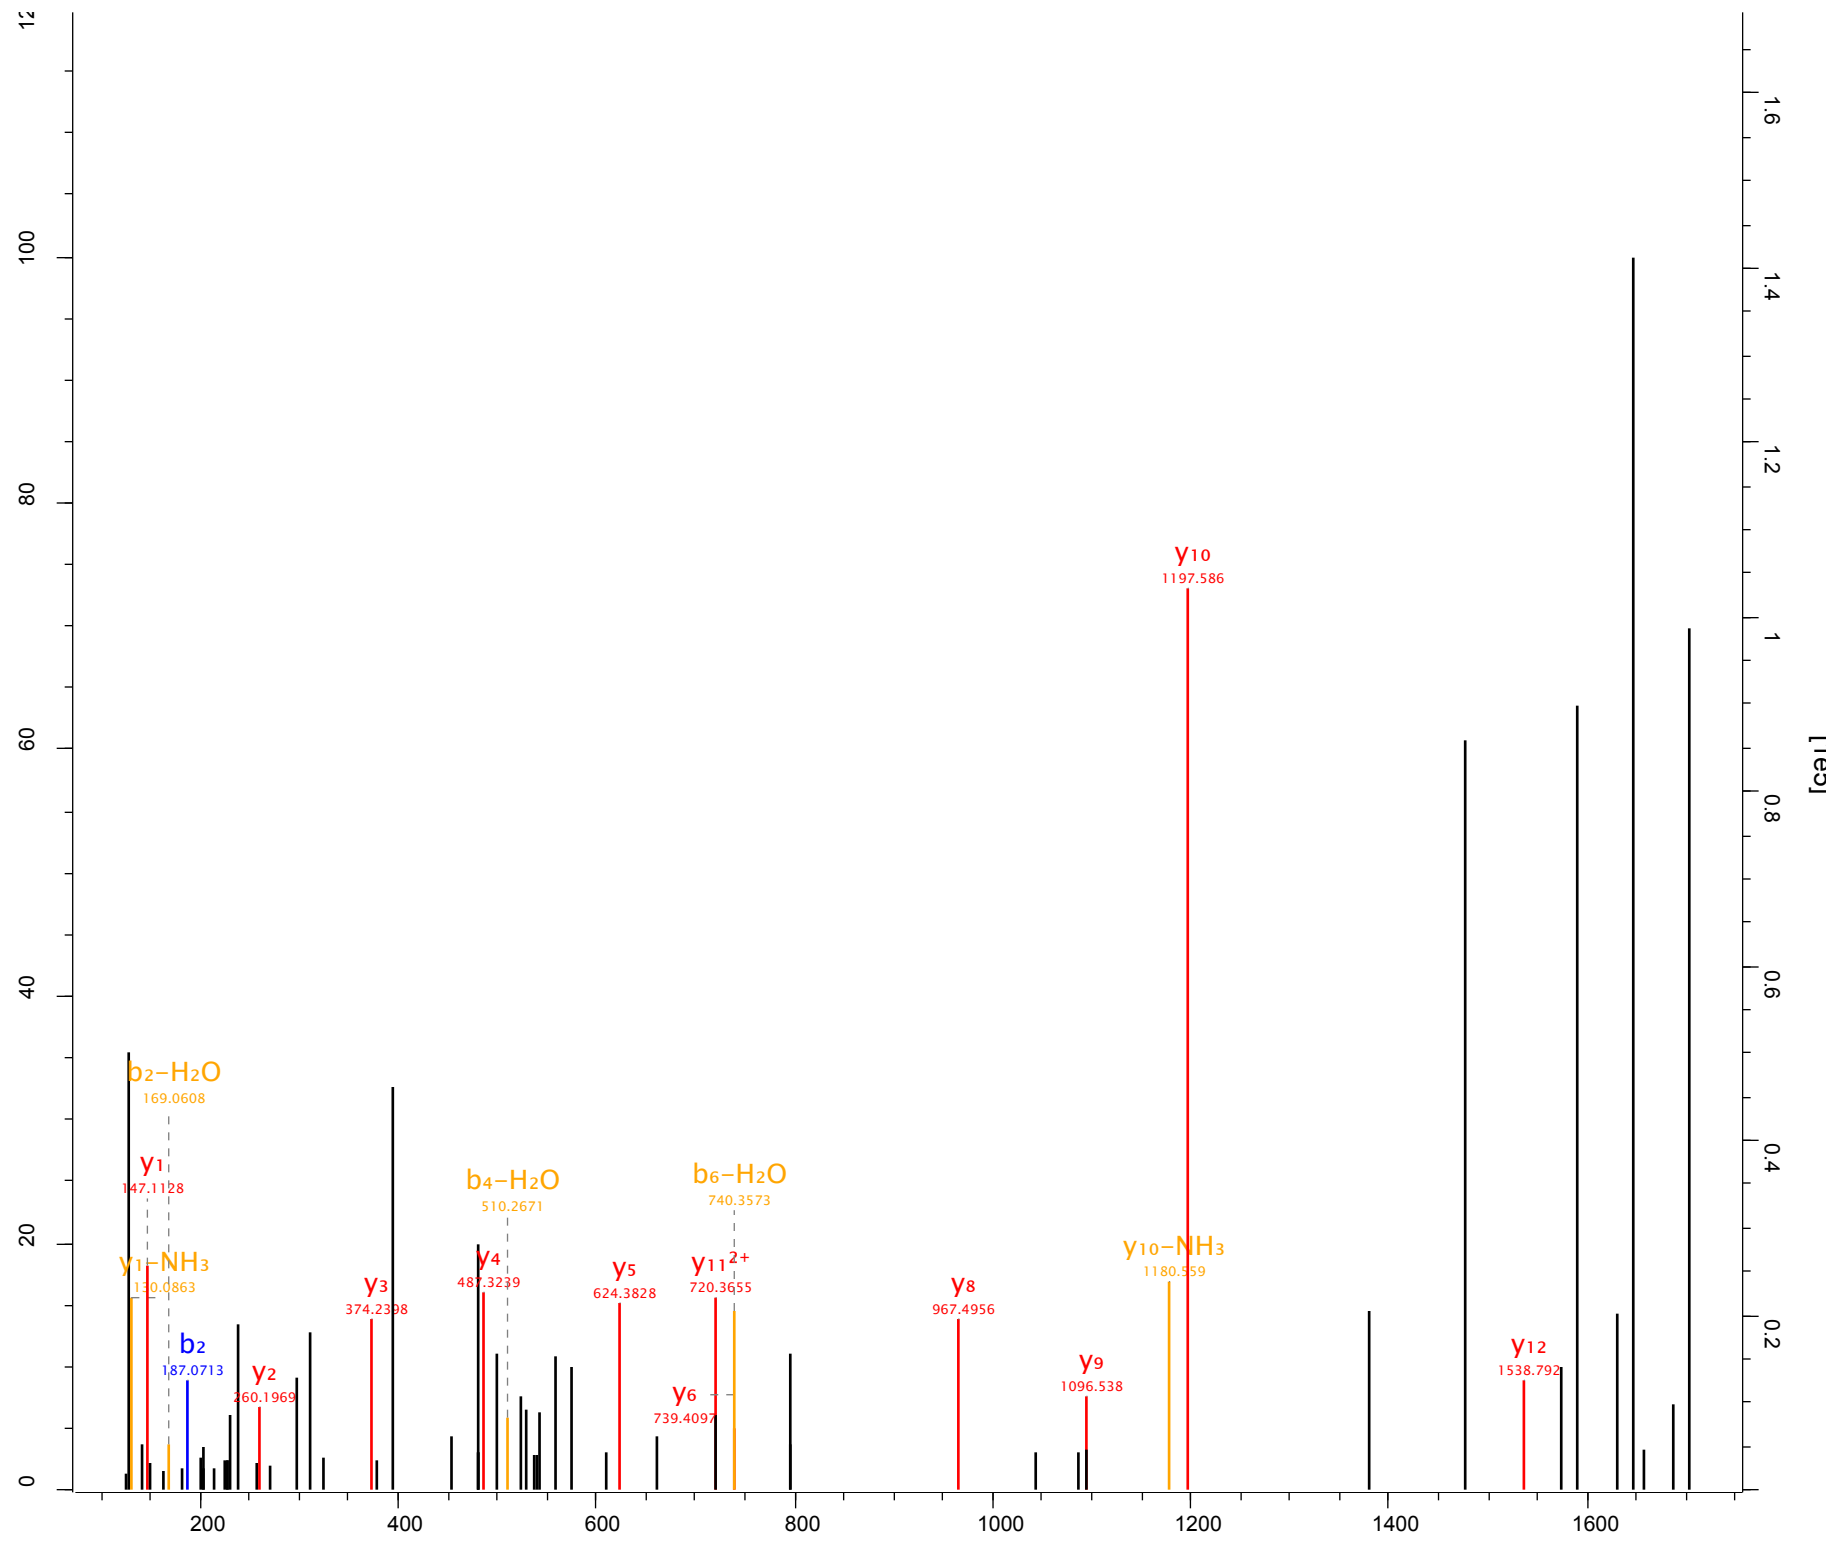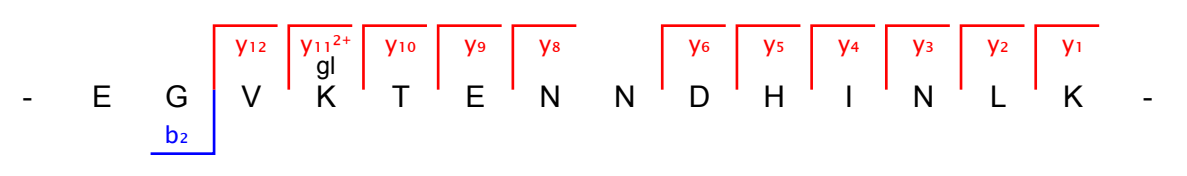

Raw file GdYVWfi a '9j JXYbVW' =B '+ \$  
QE\_SC\_double\_US\_U2OS12221099\_MG132\_BR1\_TR3

Scan 14540 Method FTMS; HCD Score 57.43 m/z 490.78 Gene names RPL15

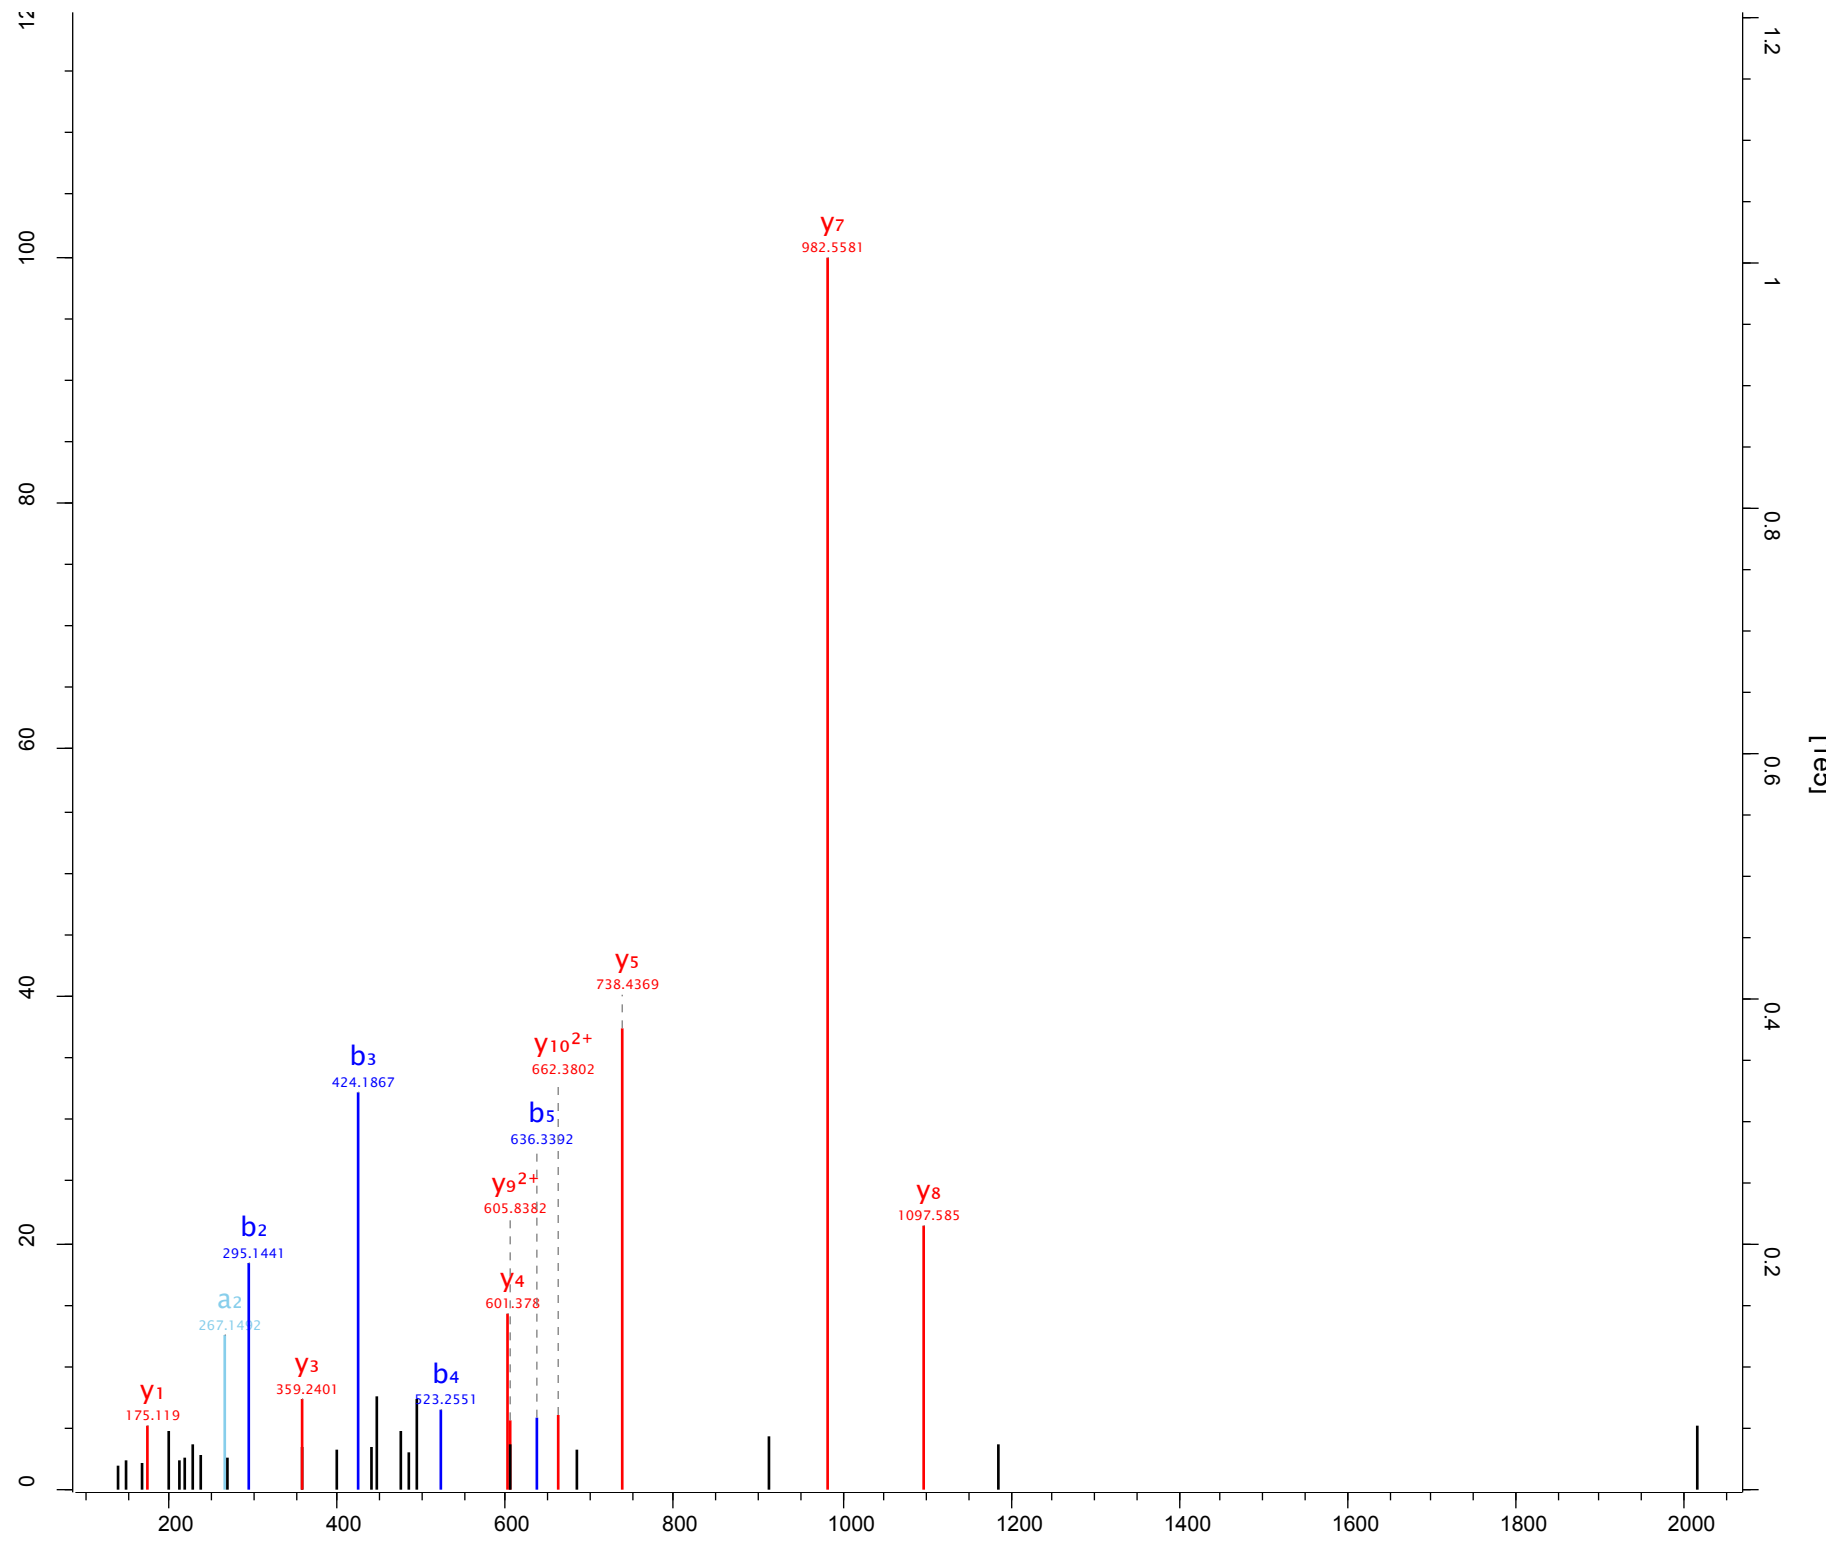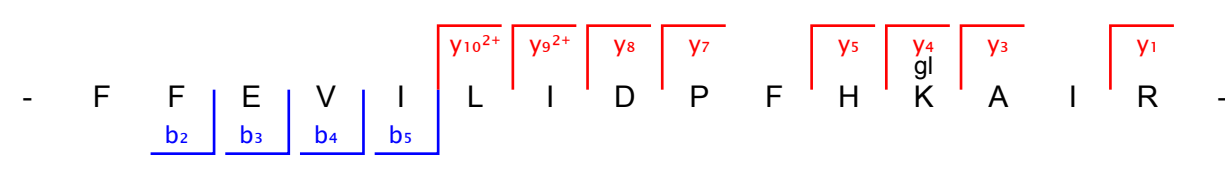

QE\_SC\_double\_US\_U2OS12221099\_DMSO\_BR4\_TR3

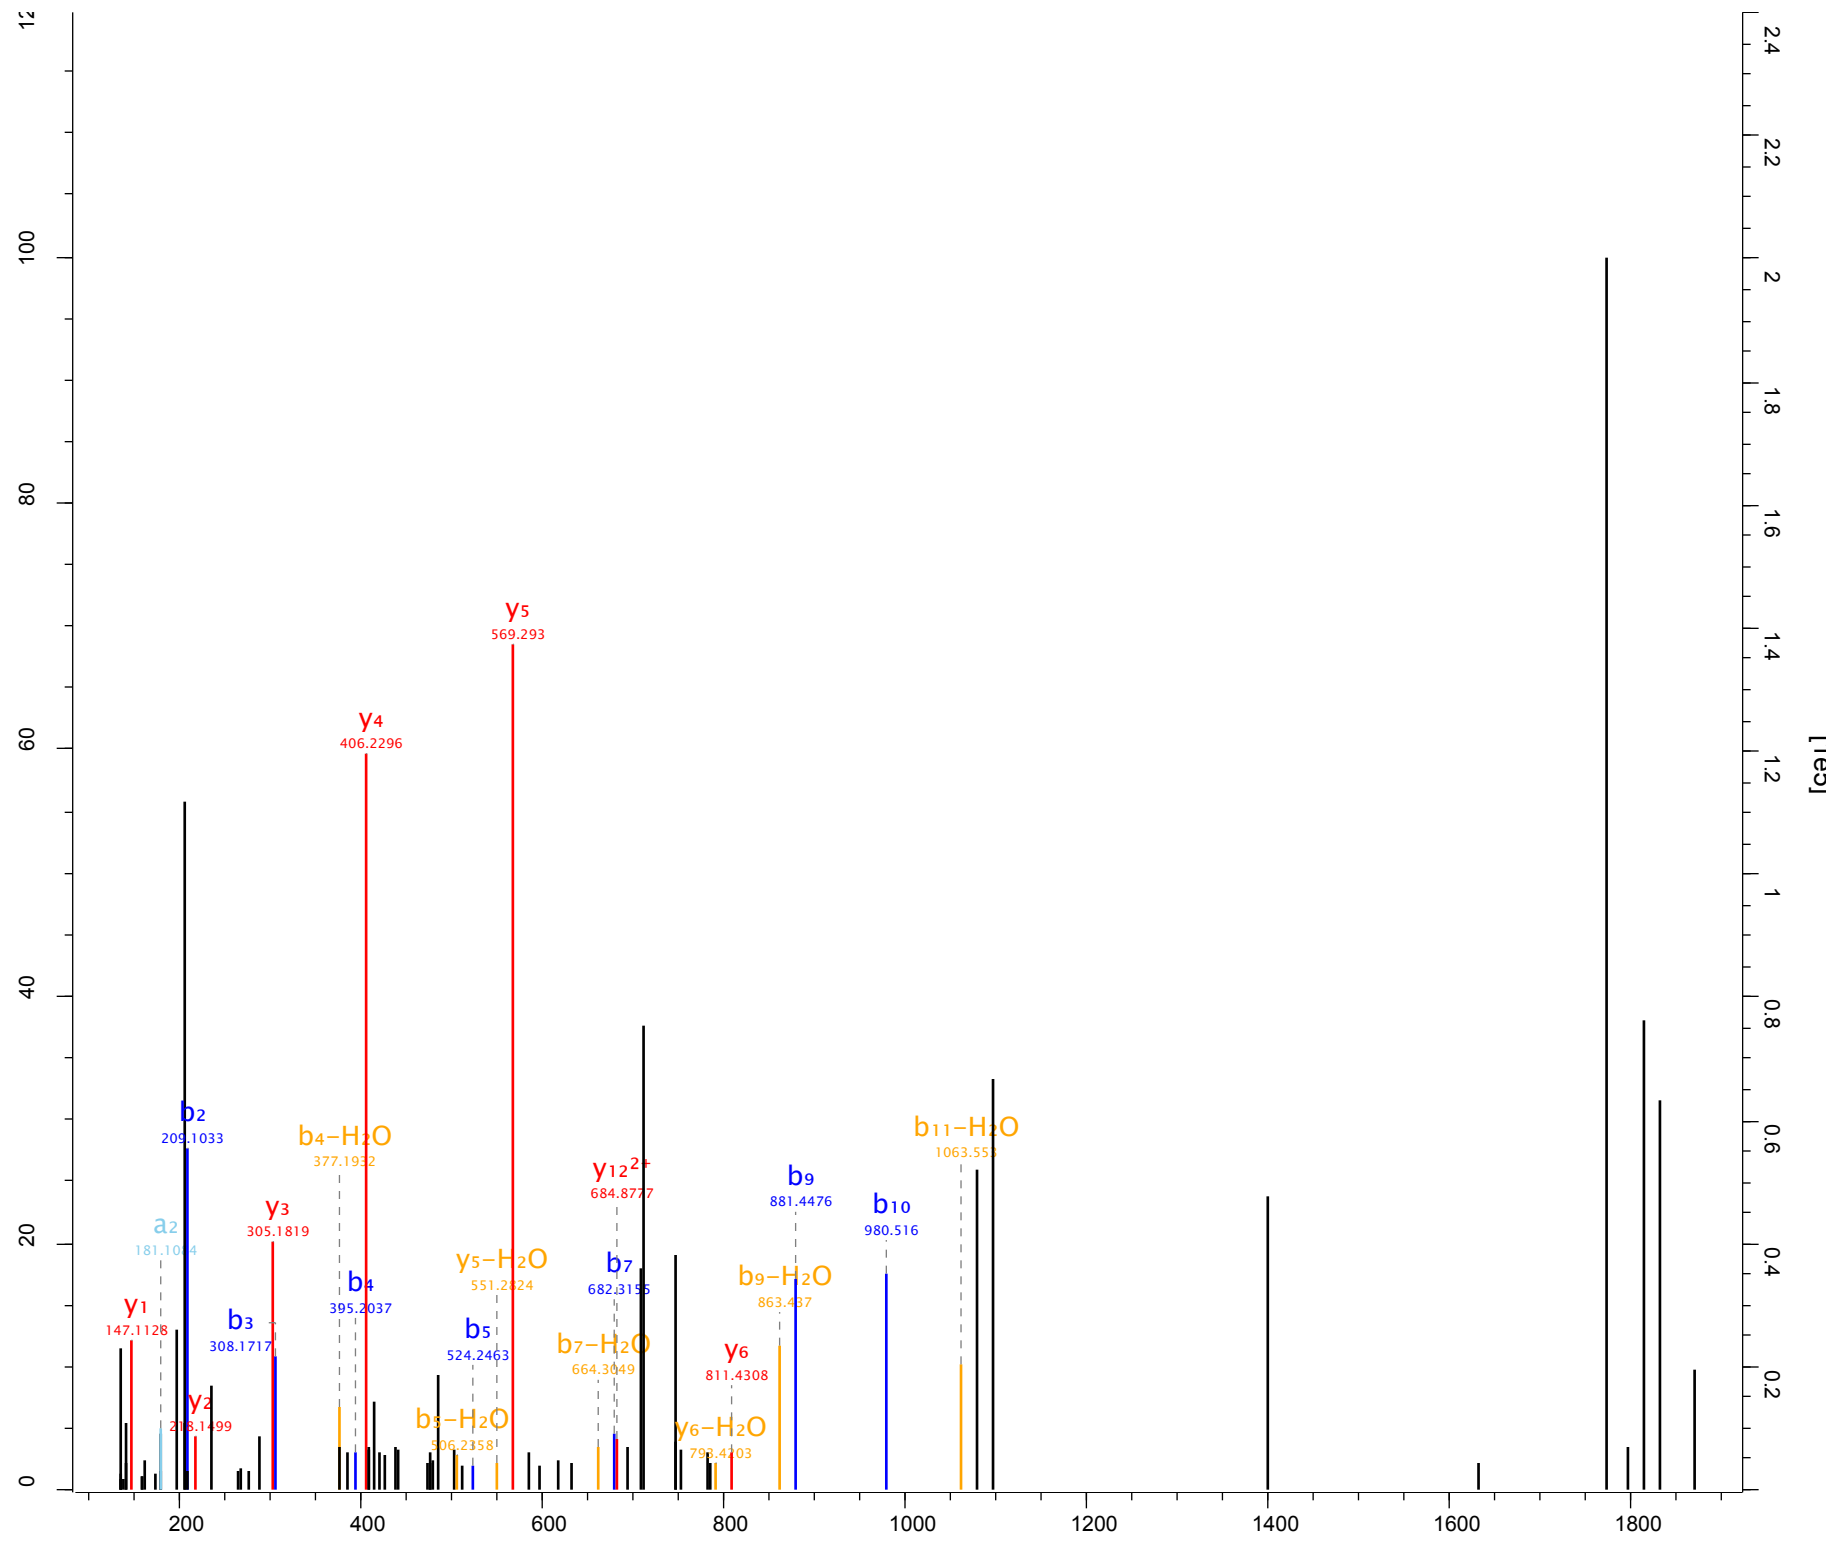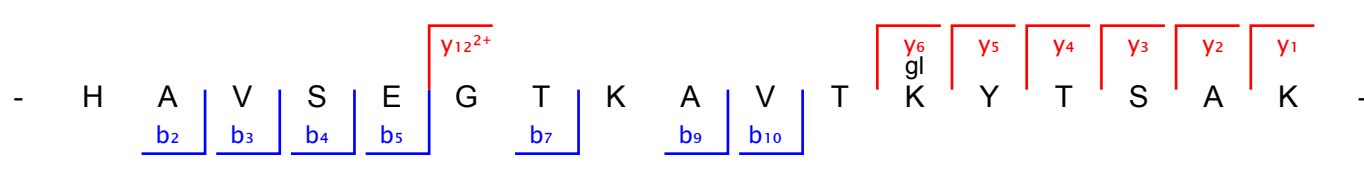



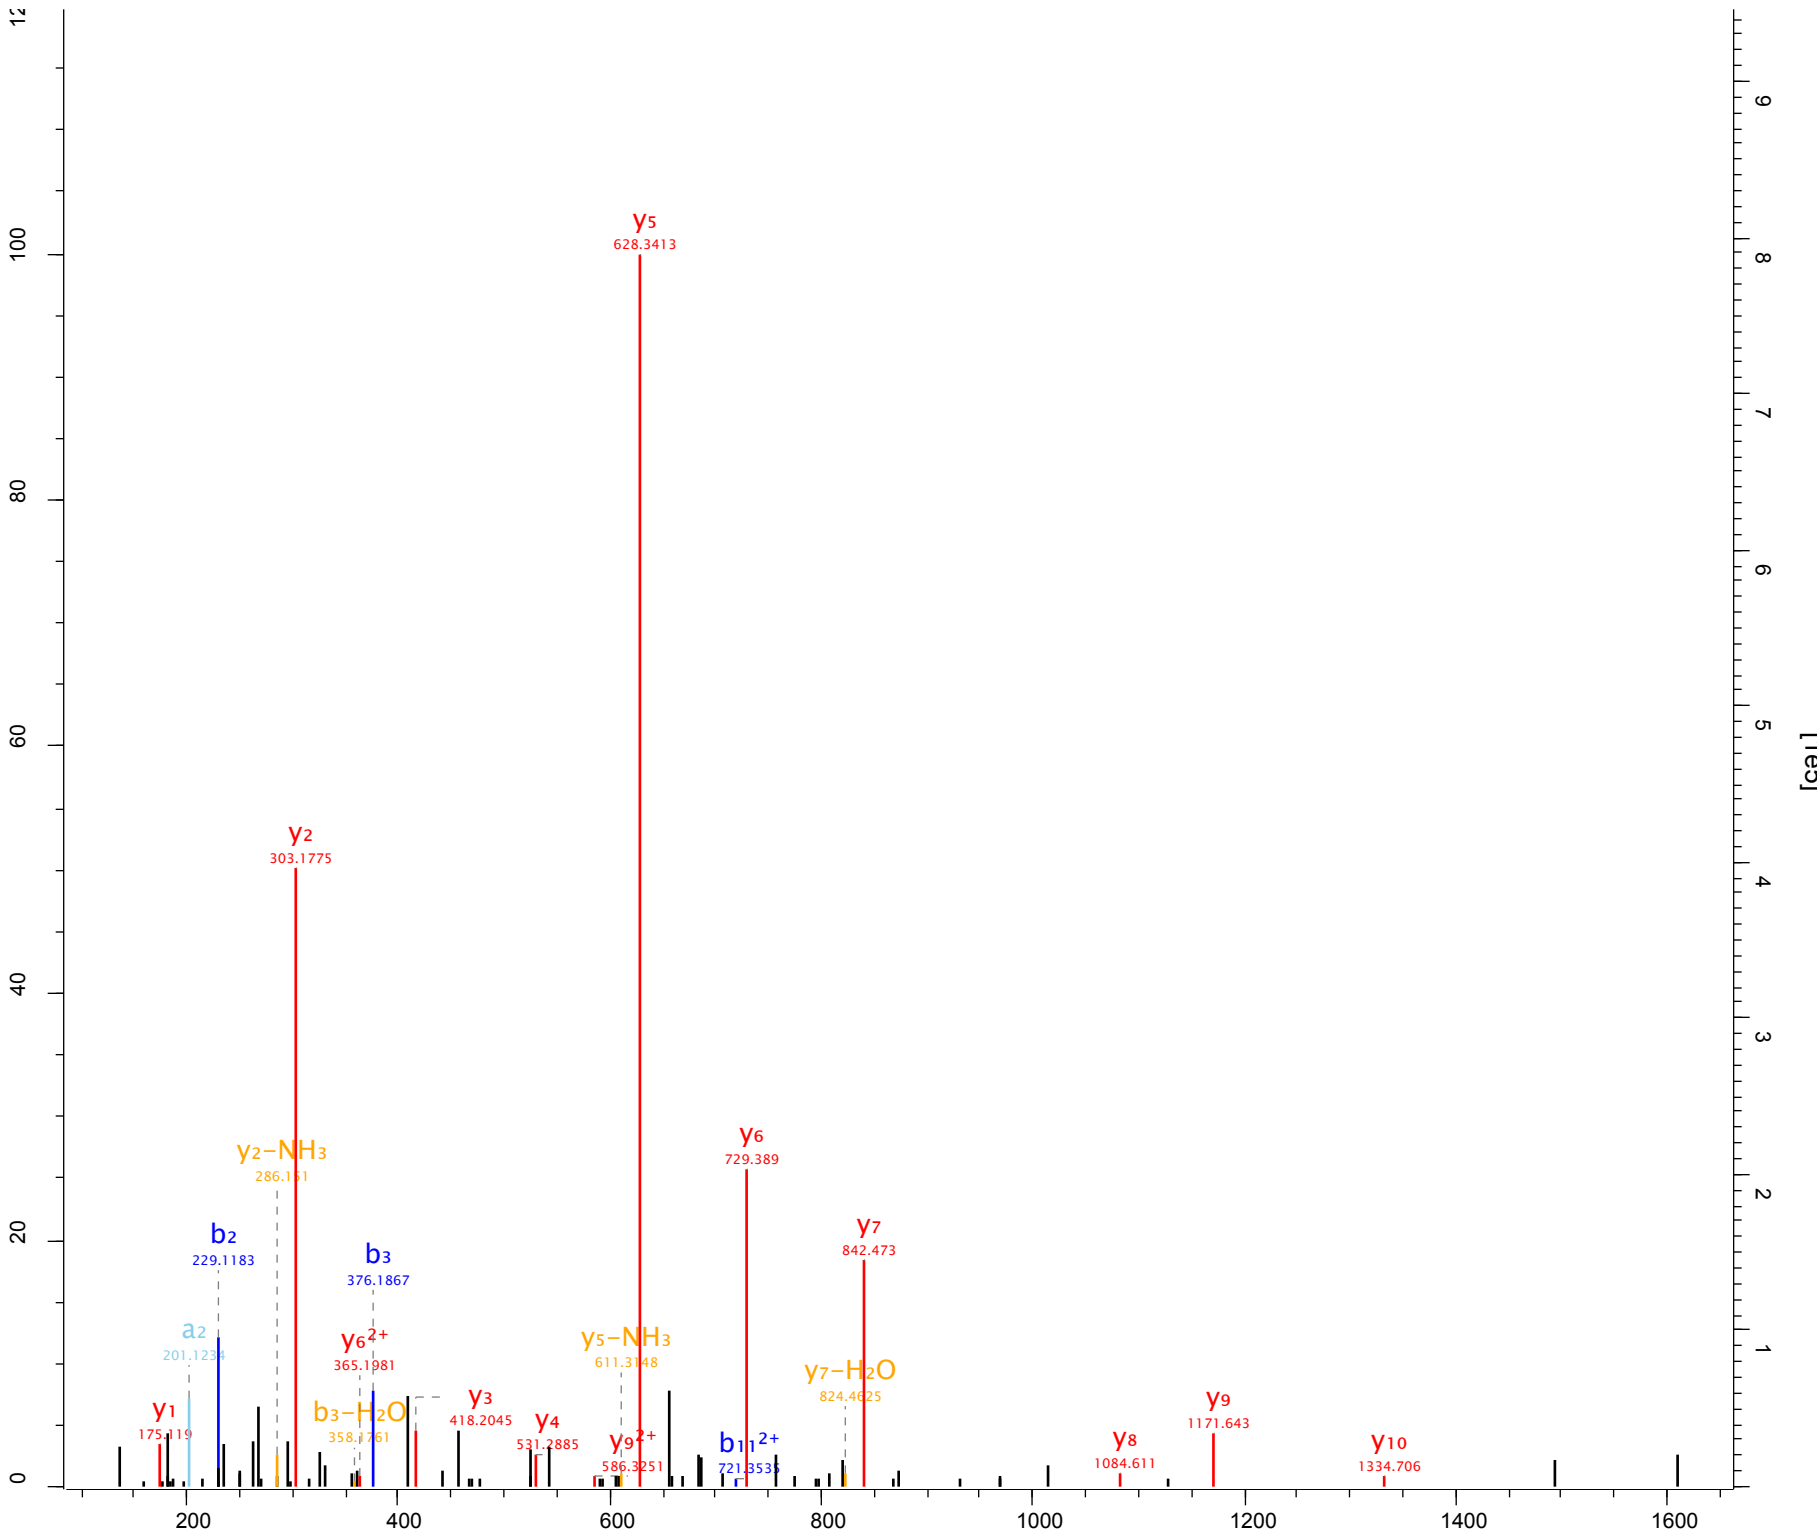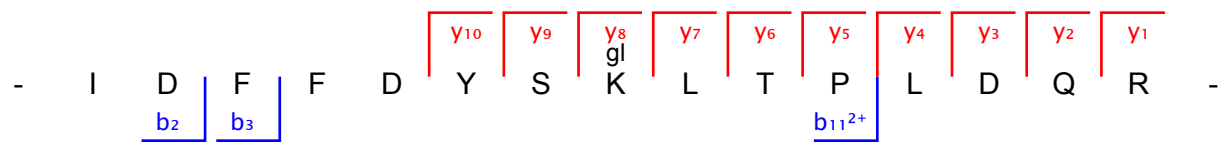

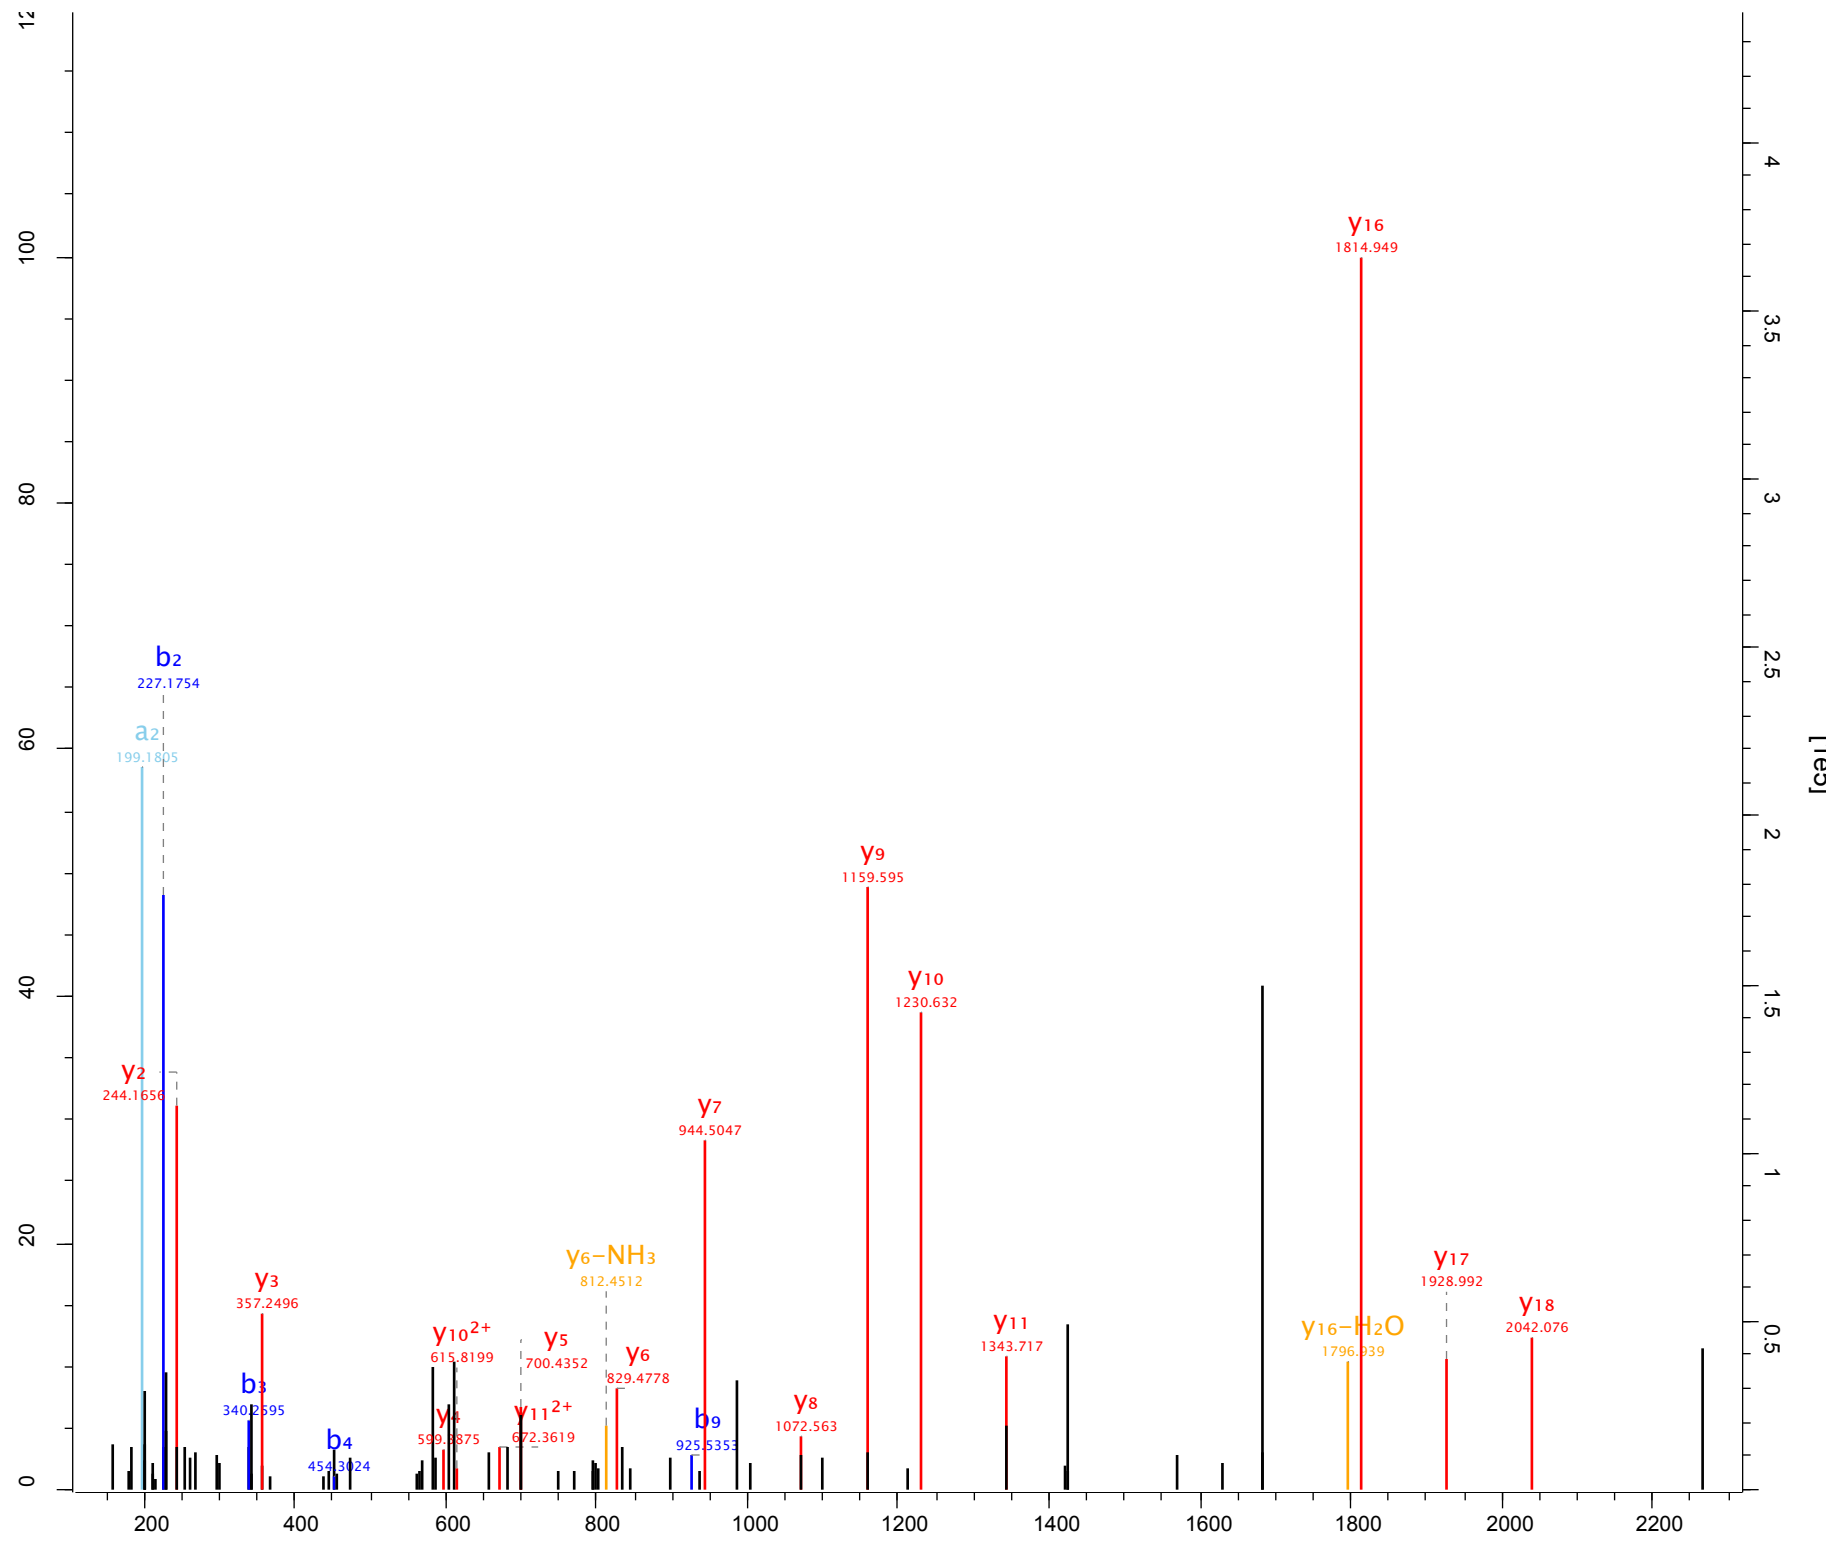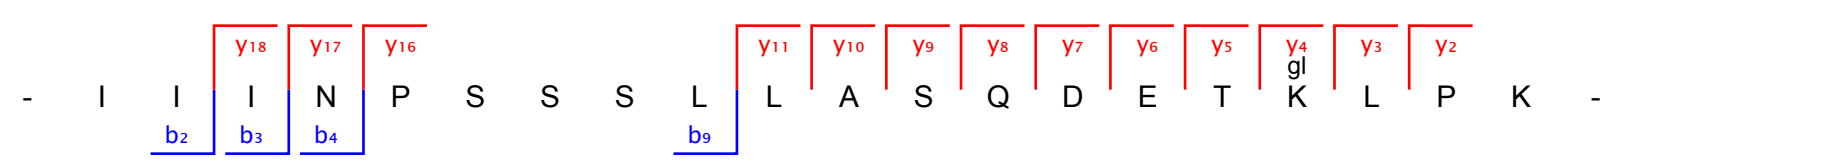

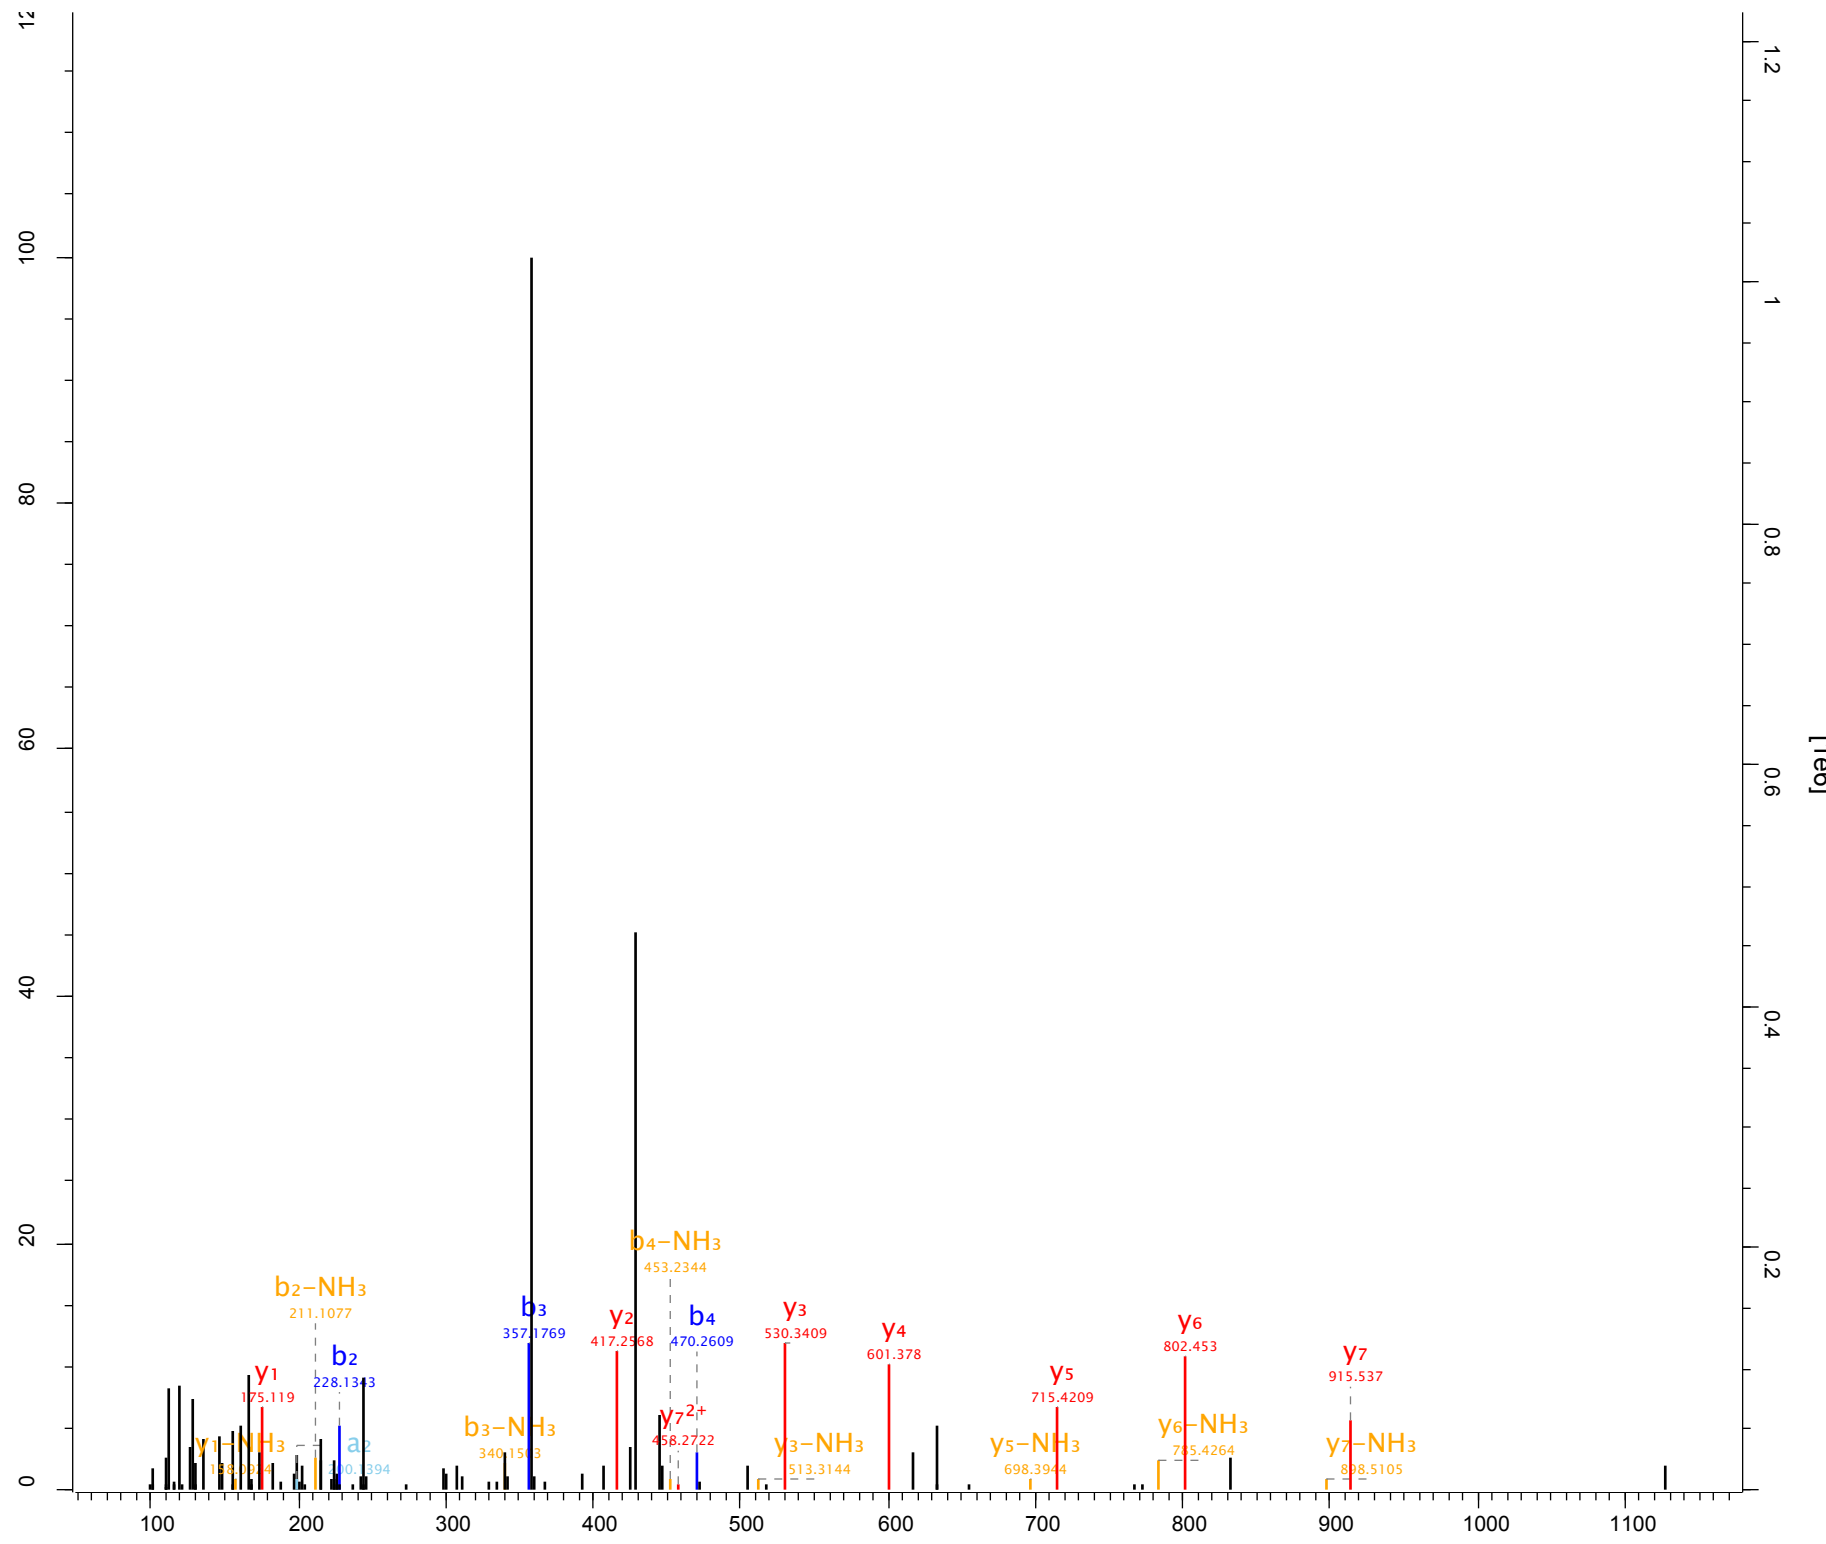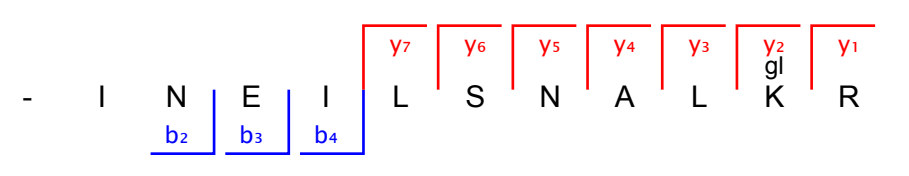

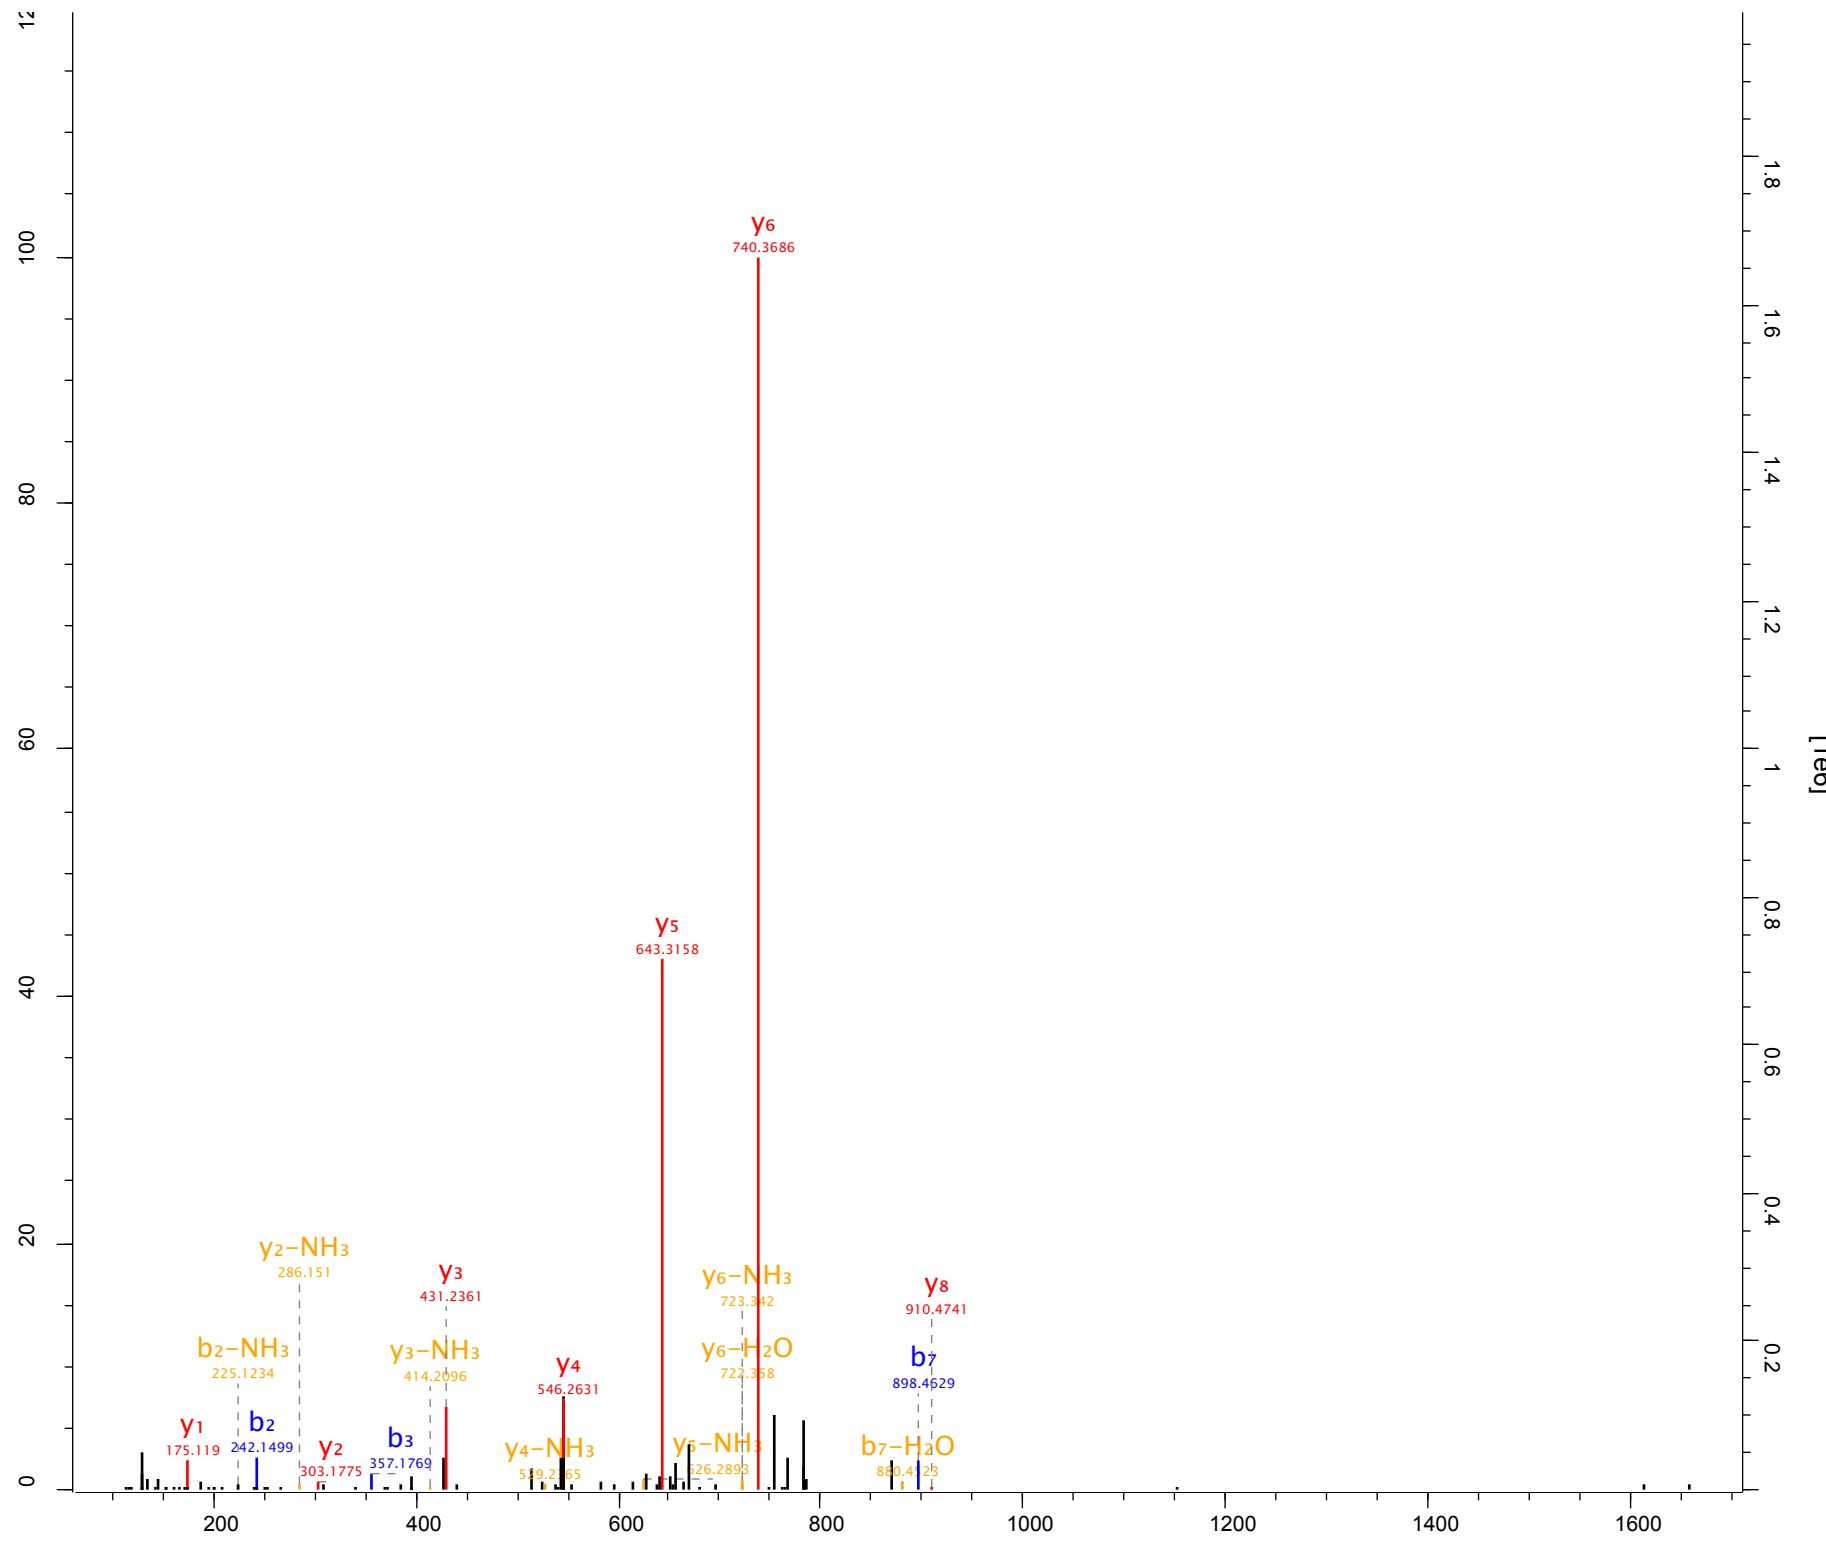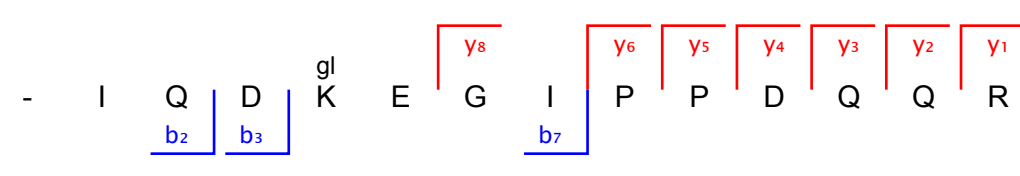

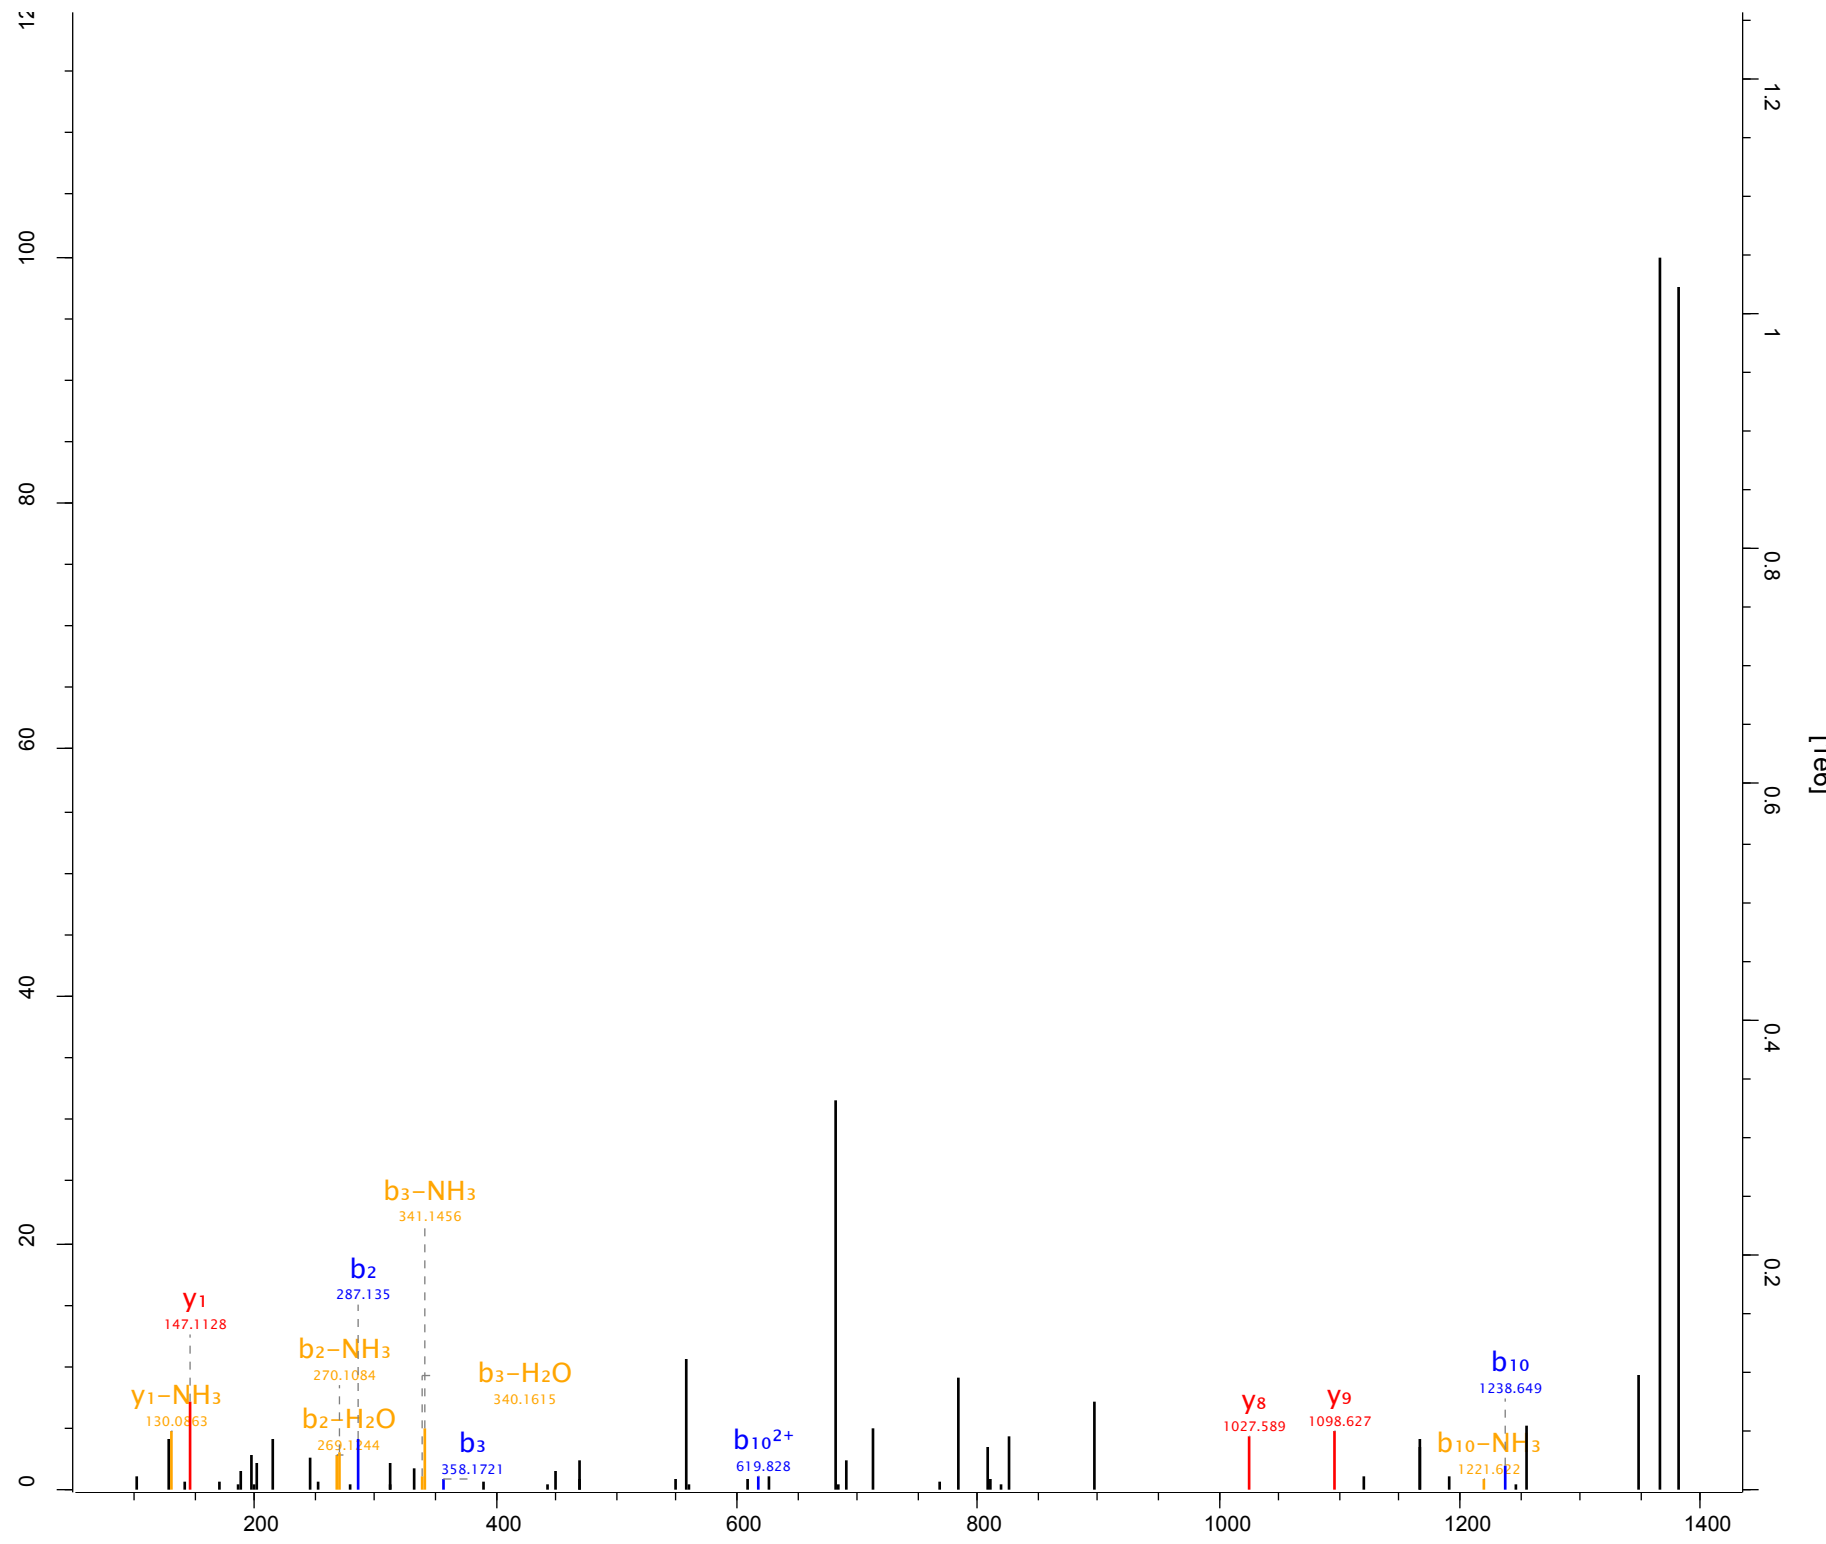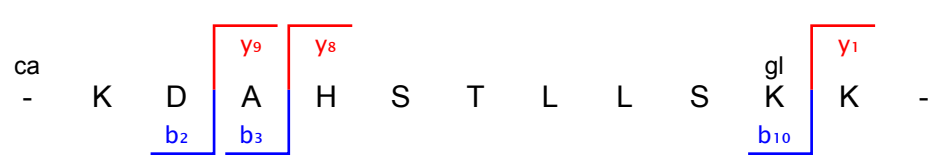



QE\_SC\_double\_SU\_U2OS12221099\_DMSO\_BR3\_TR3

4389 FTMS; HCD 70.94 499.59 MURC

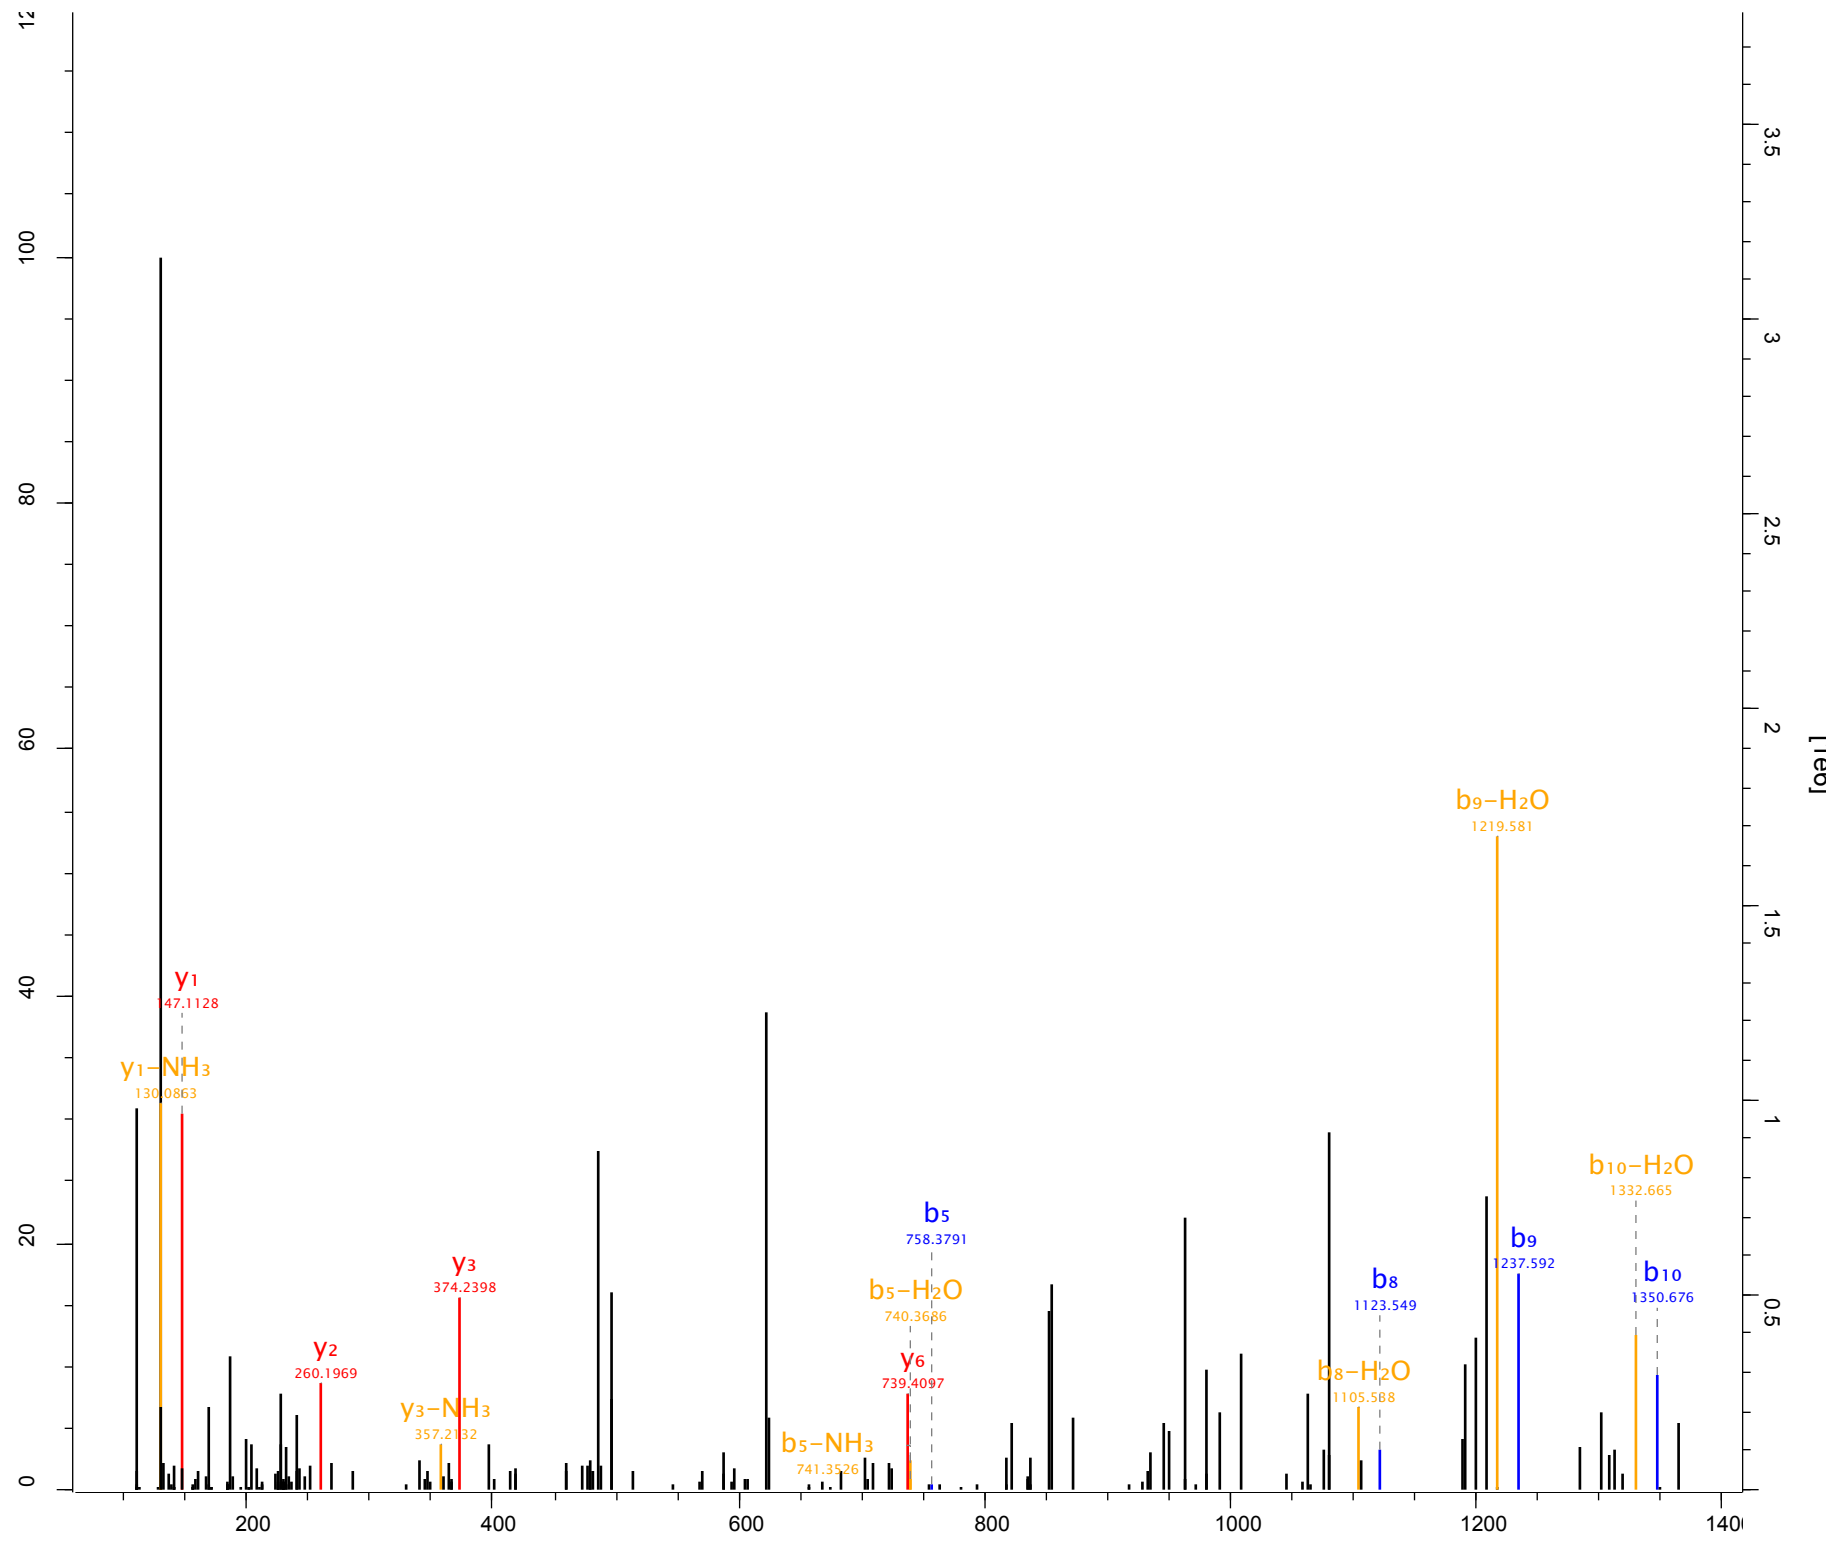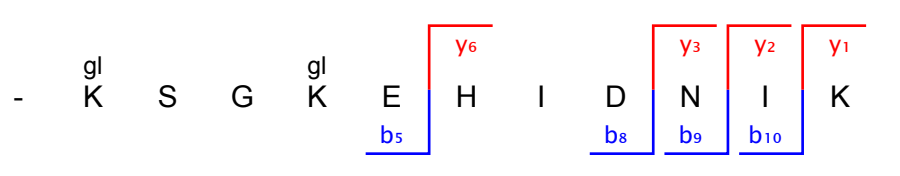

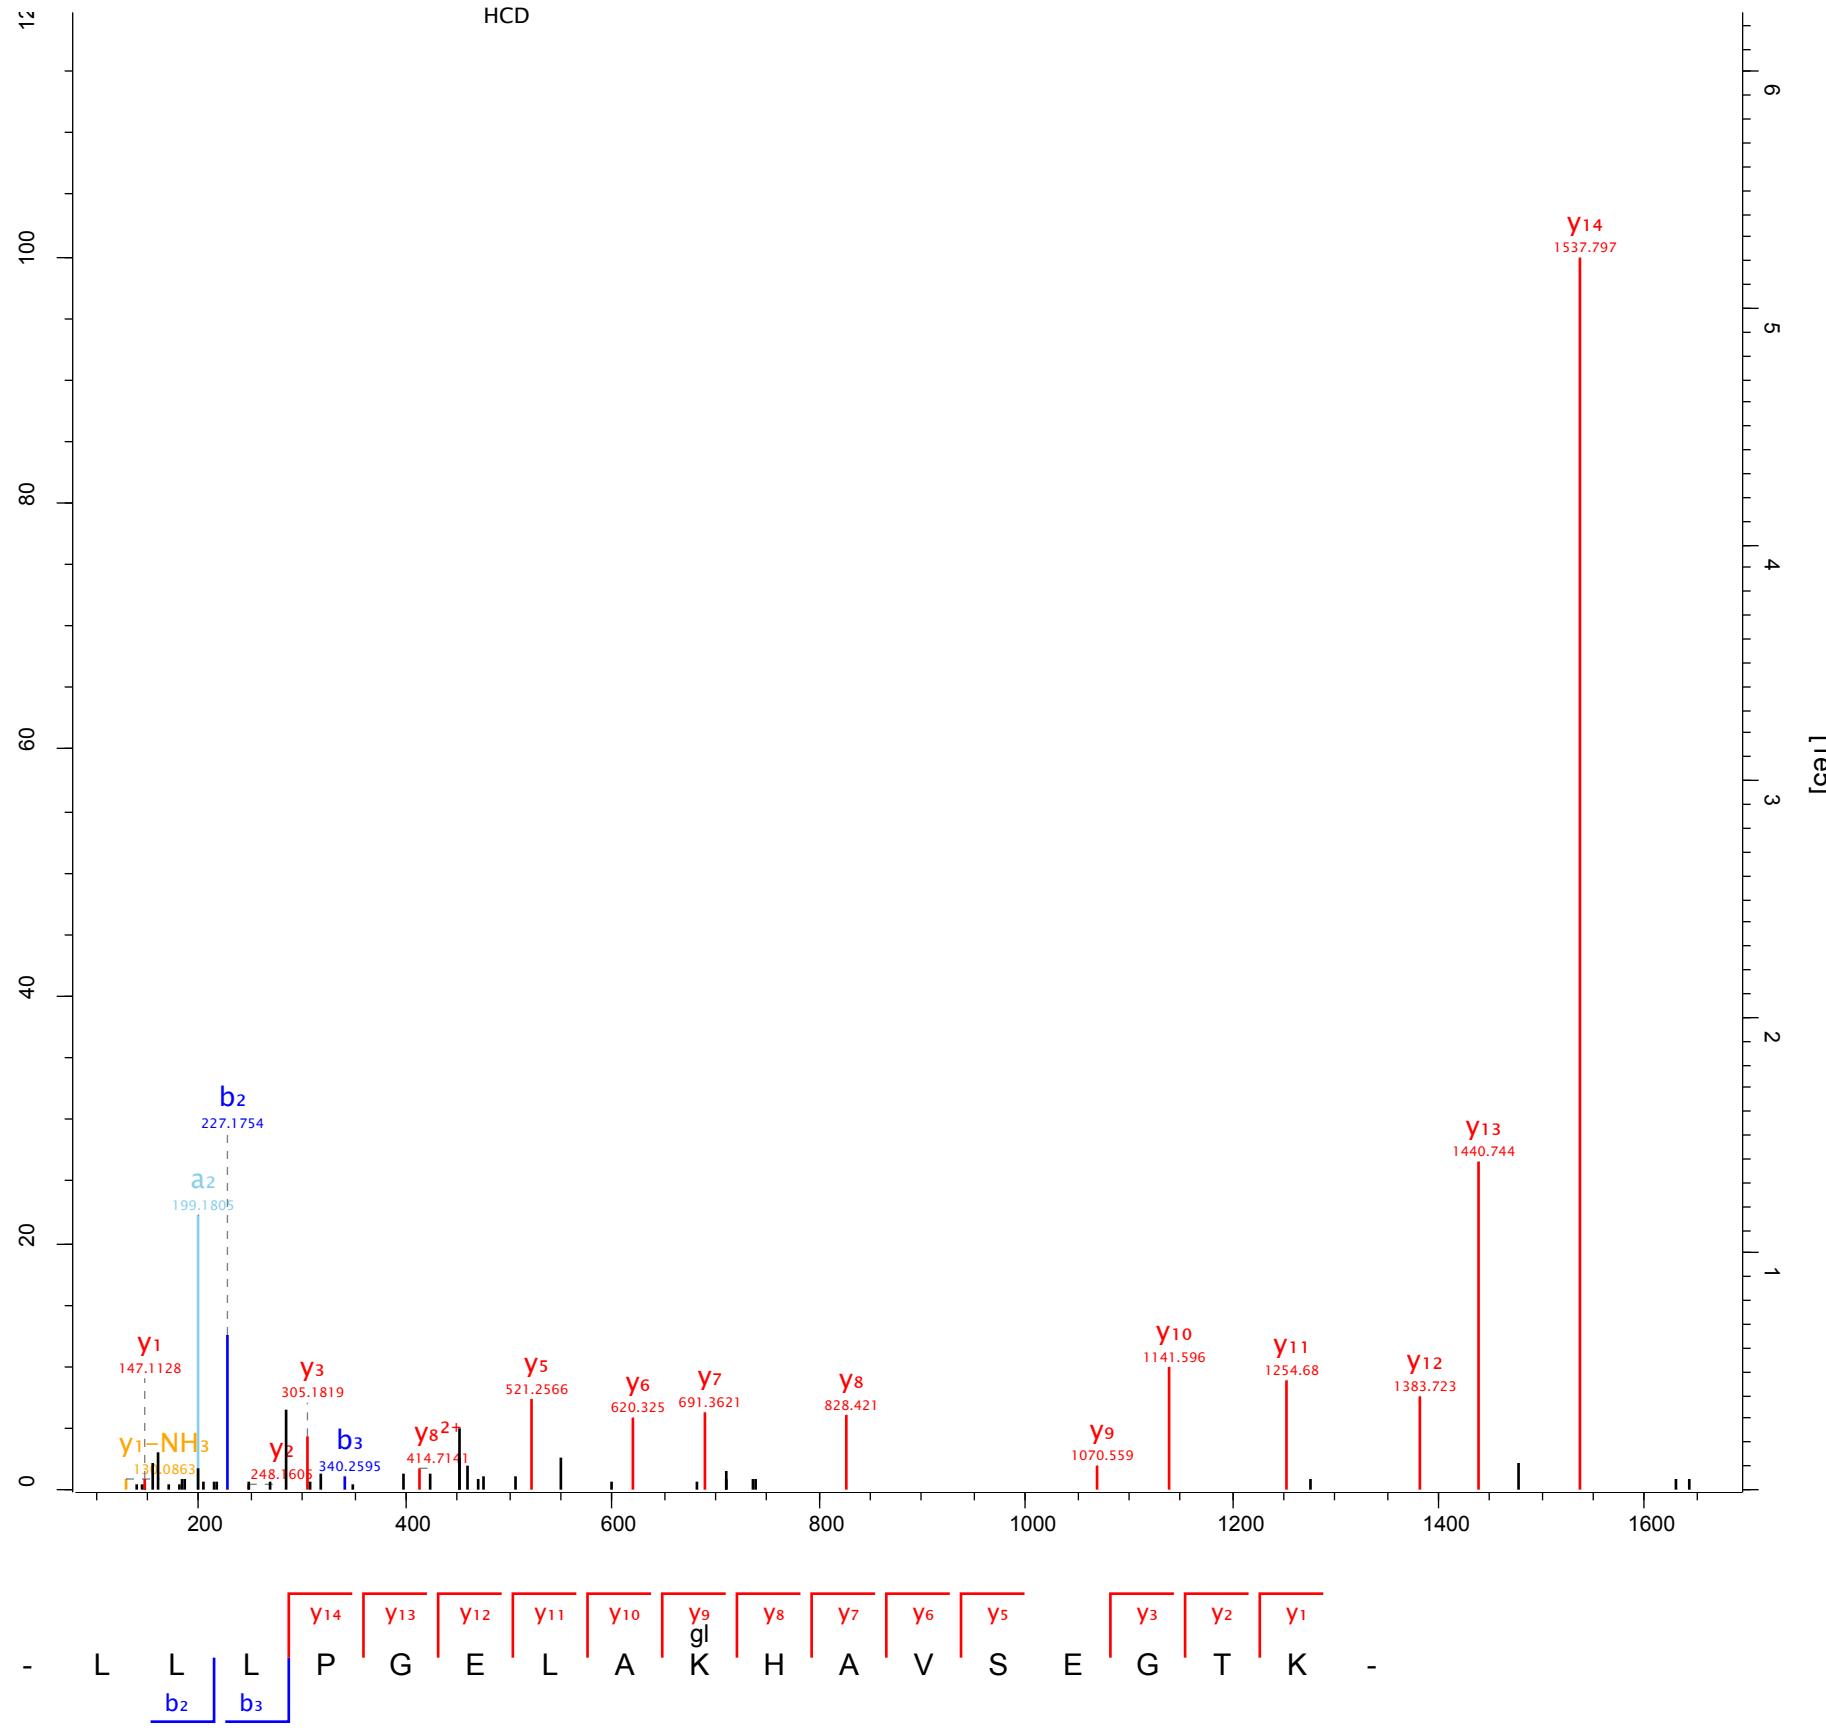



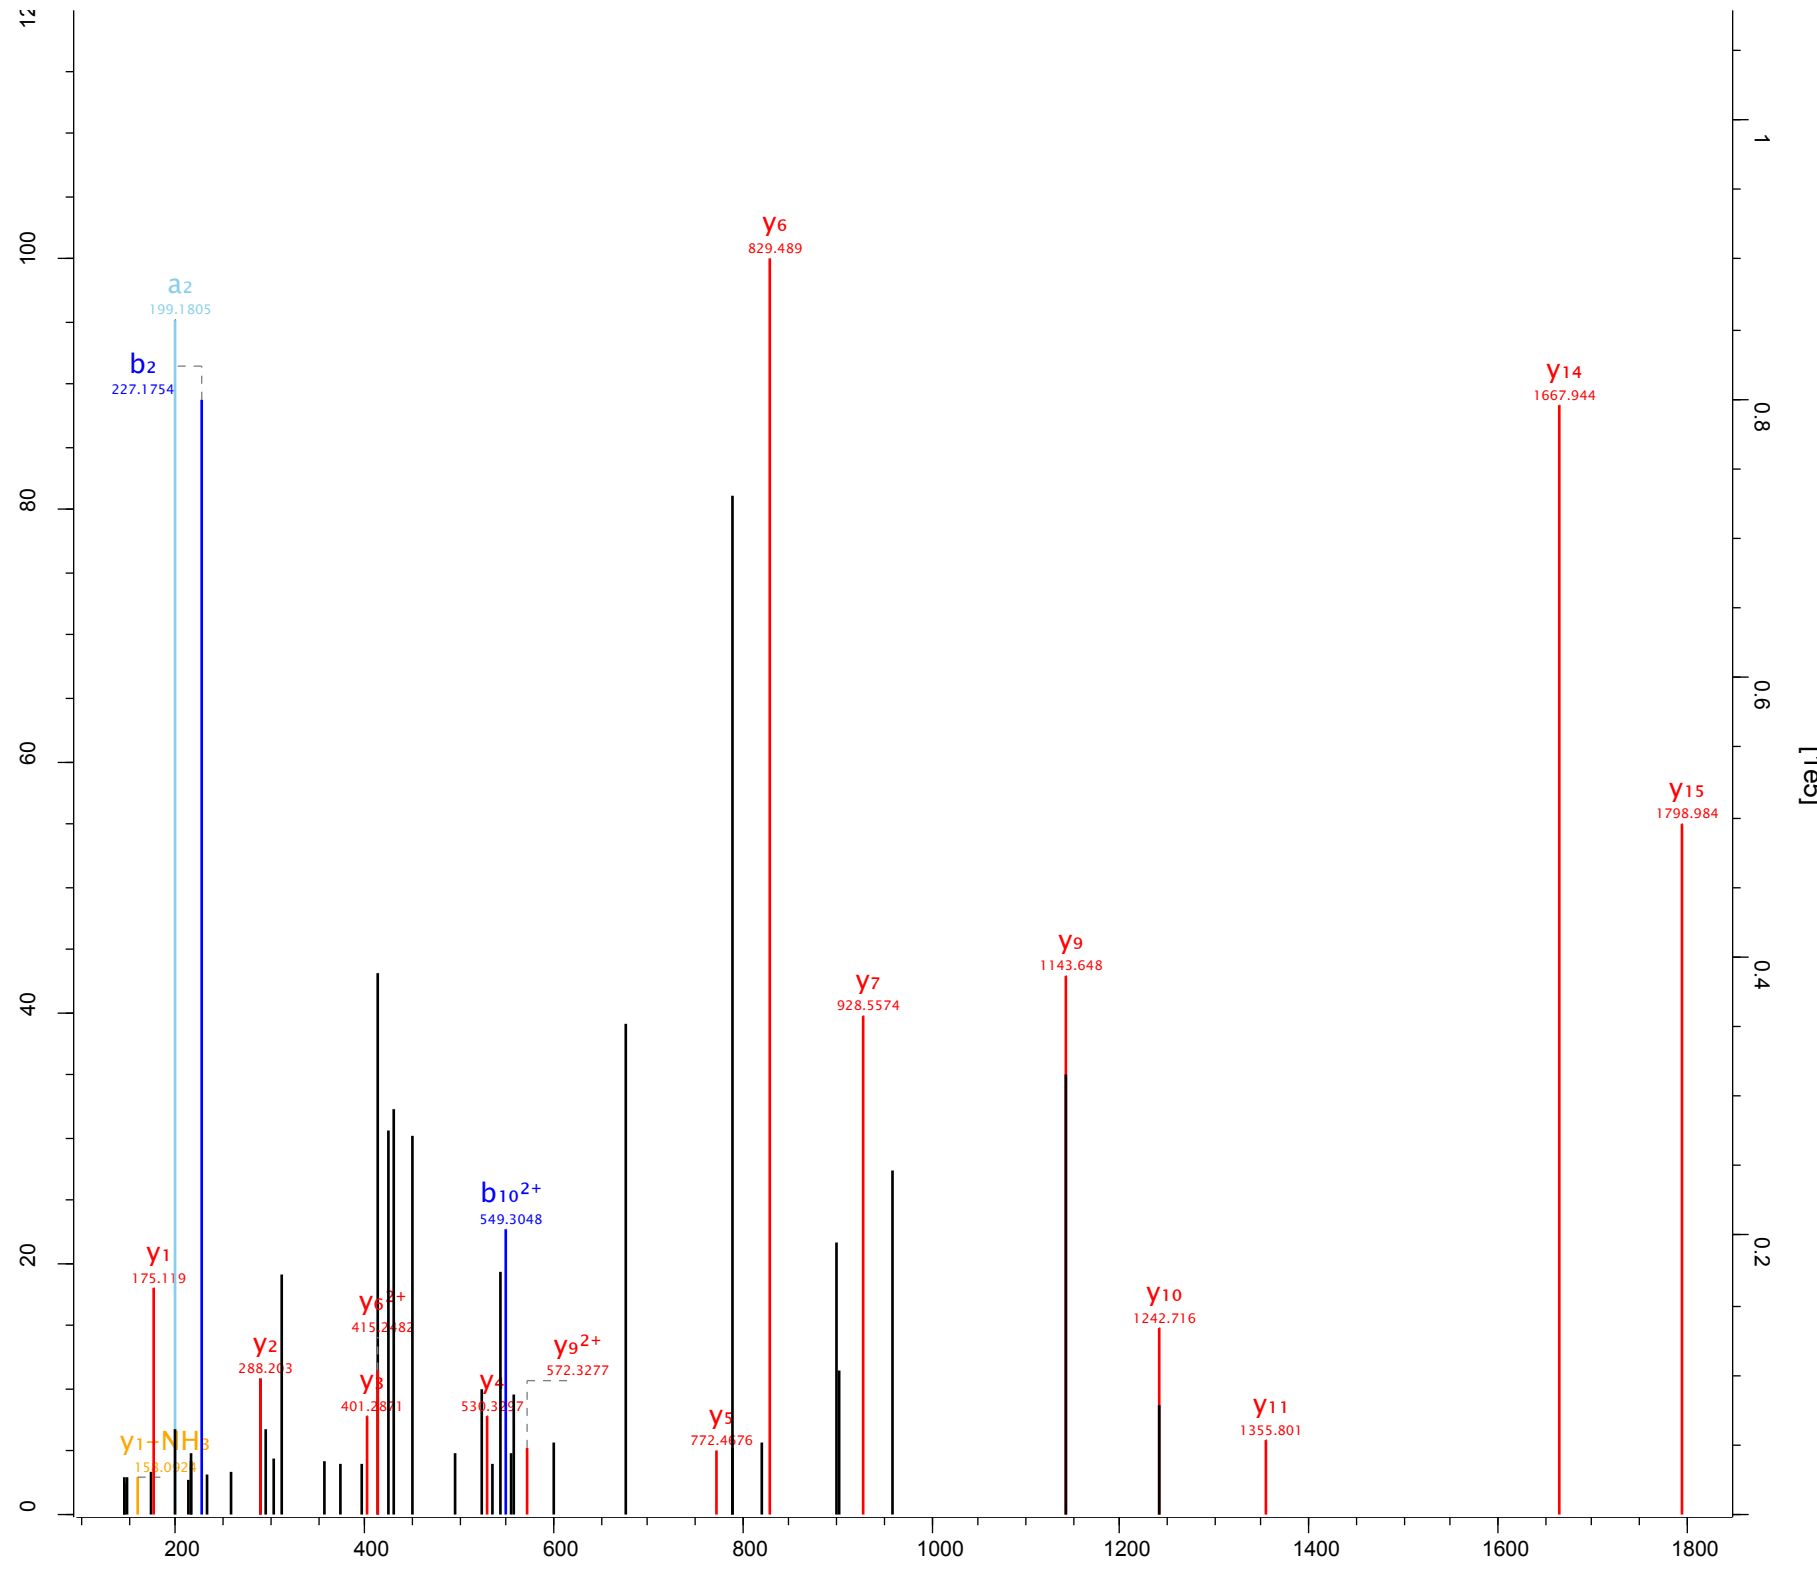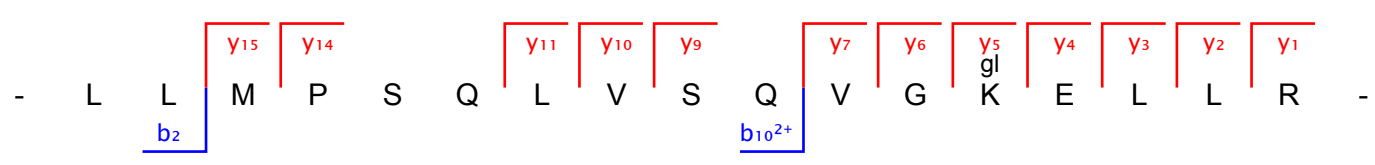

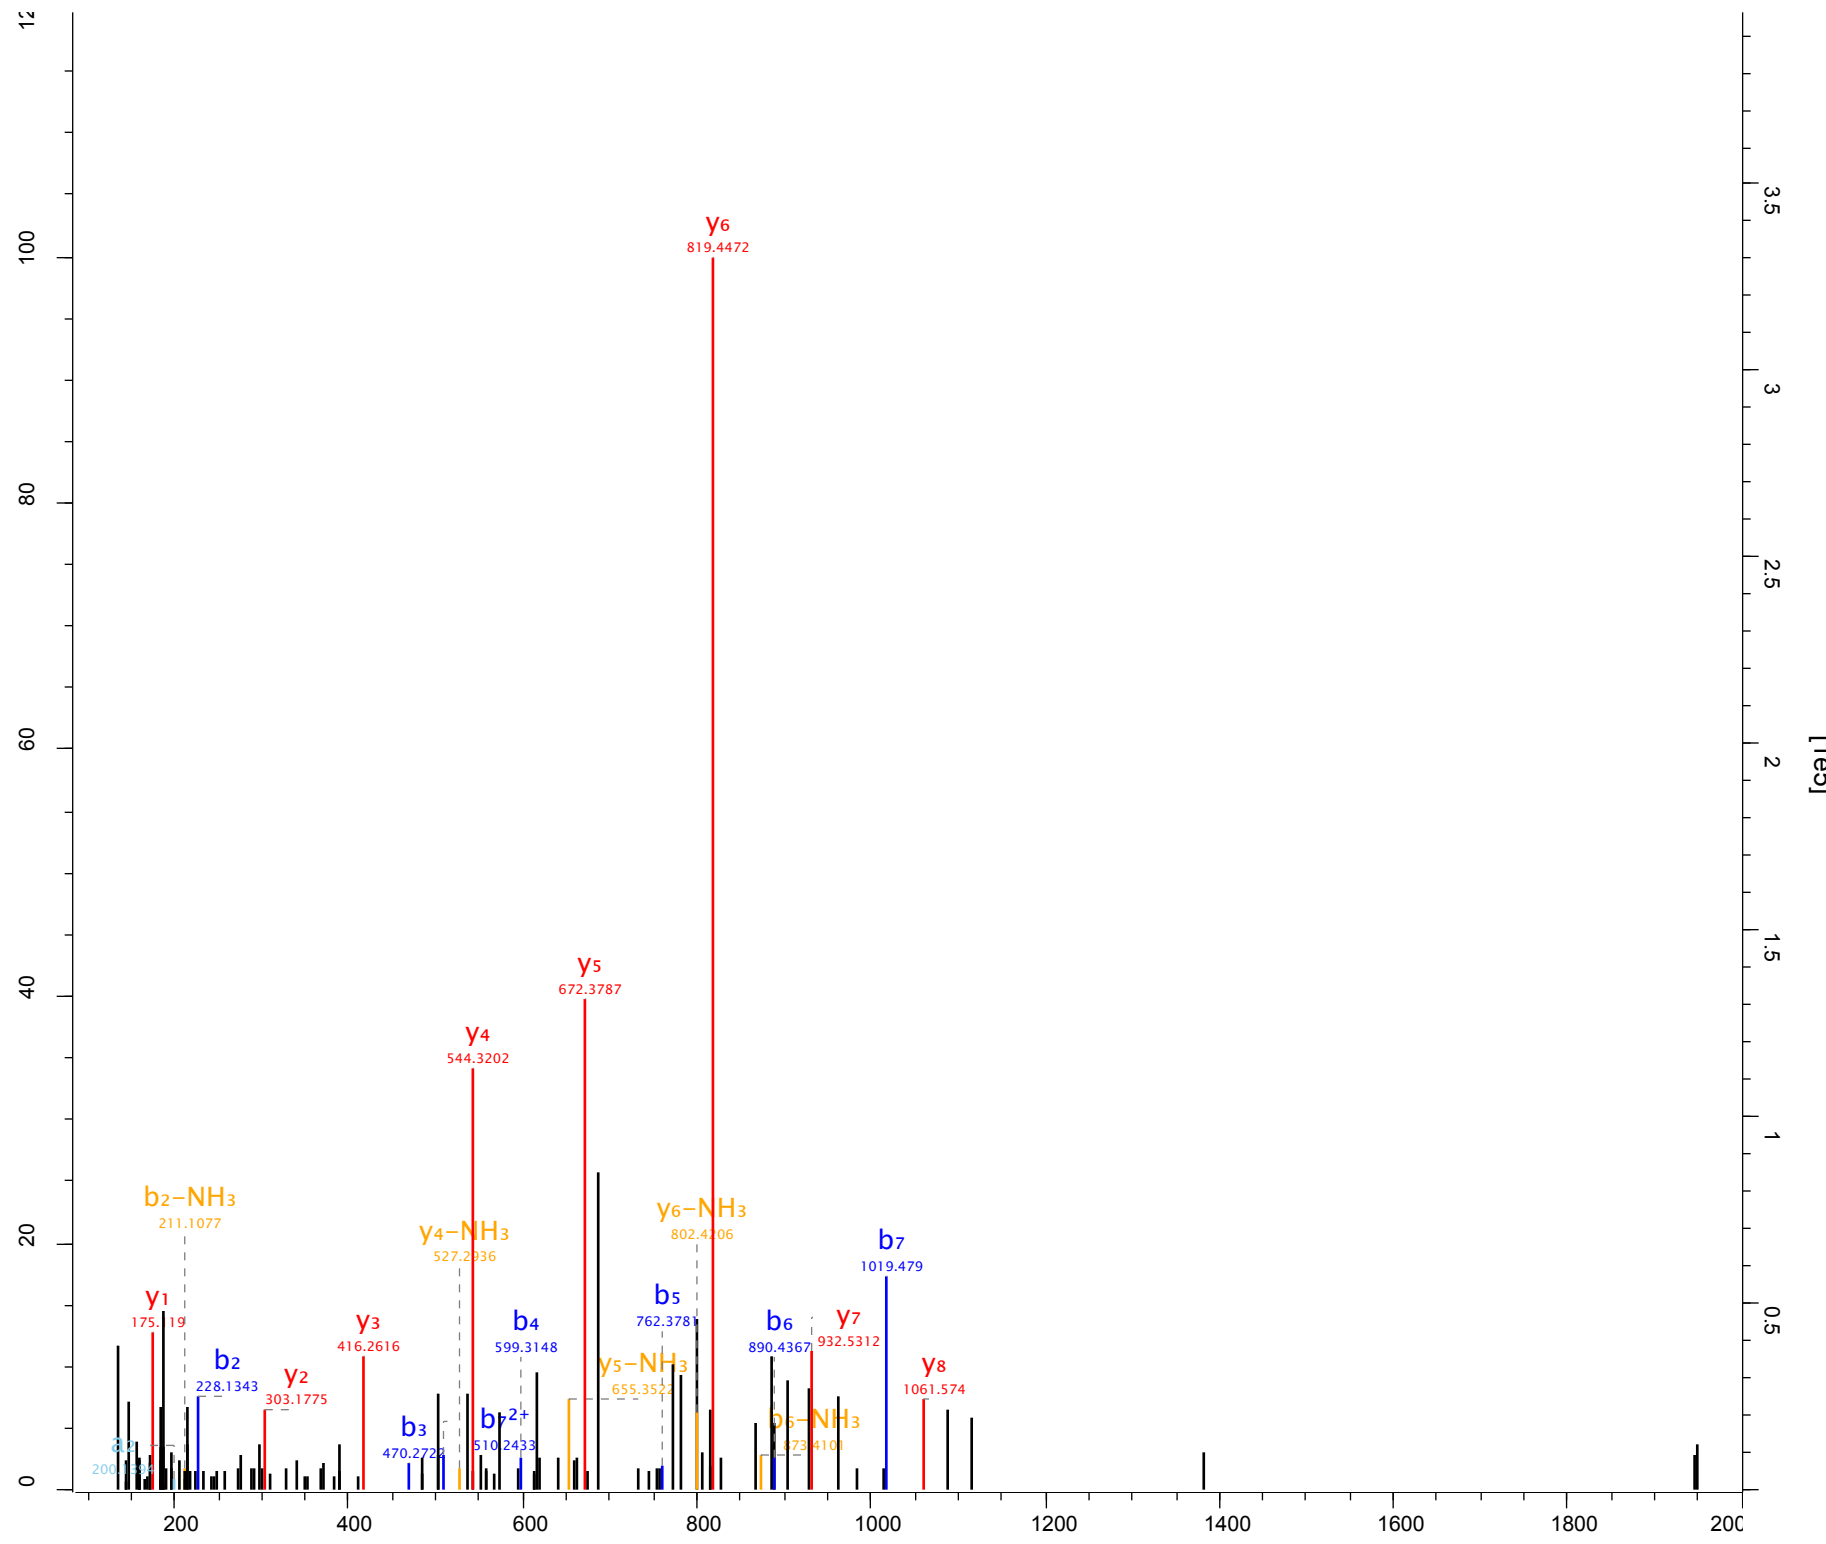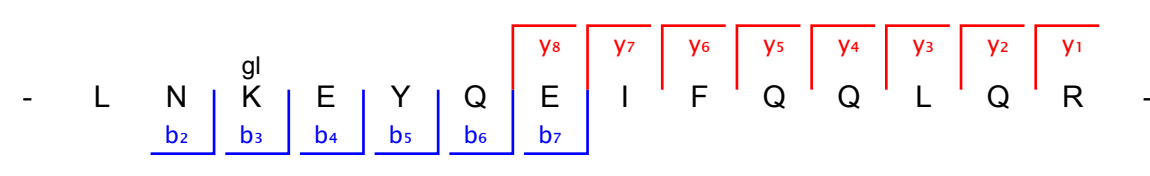

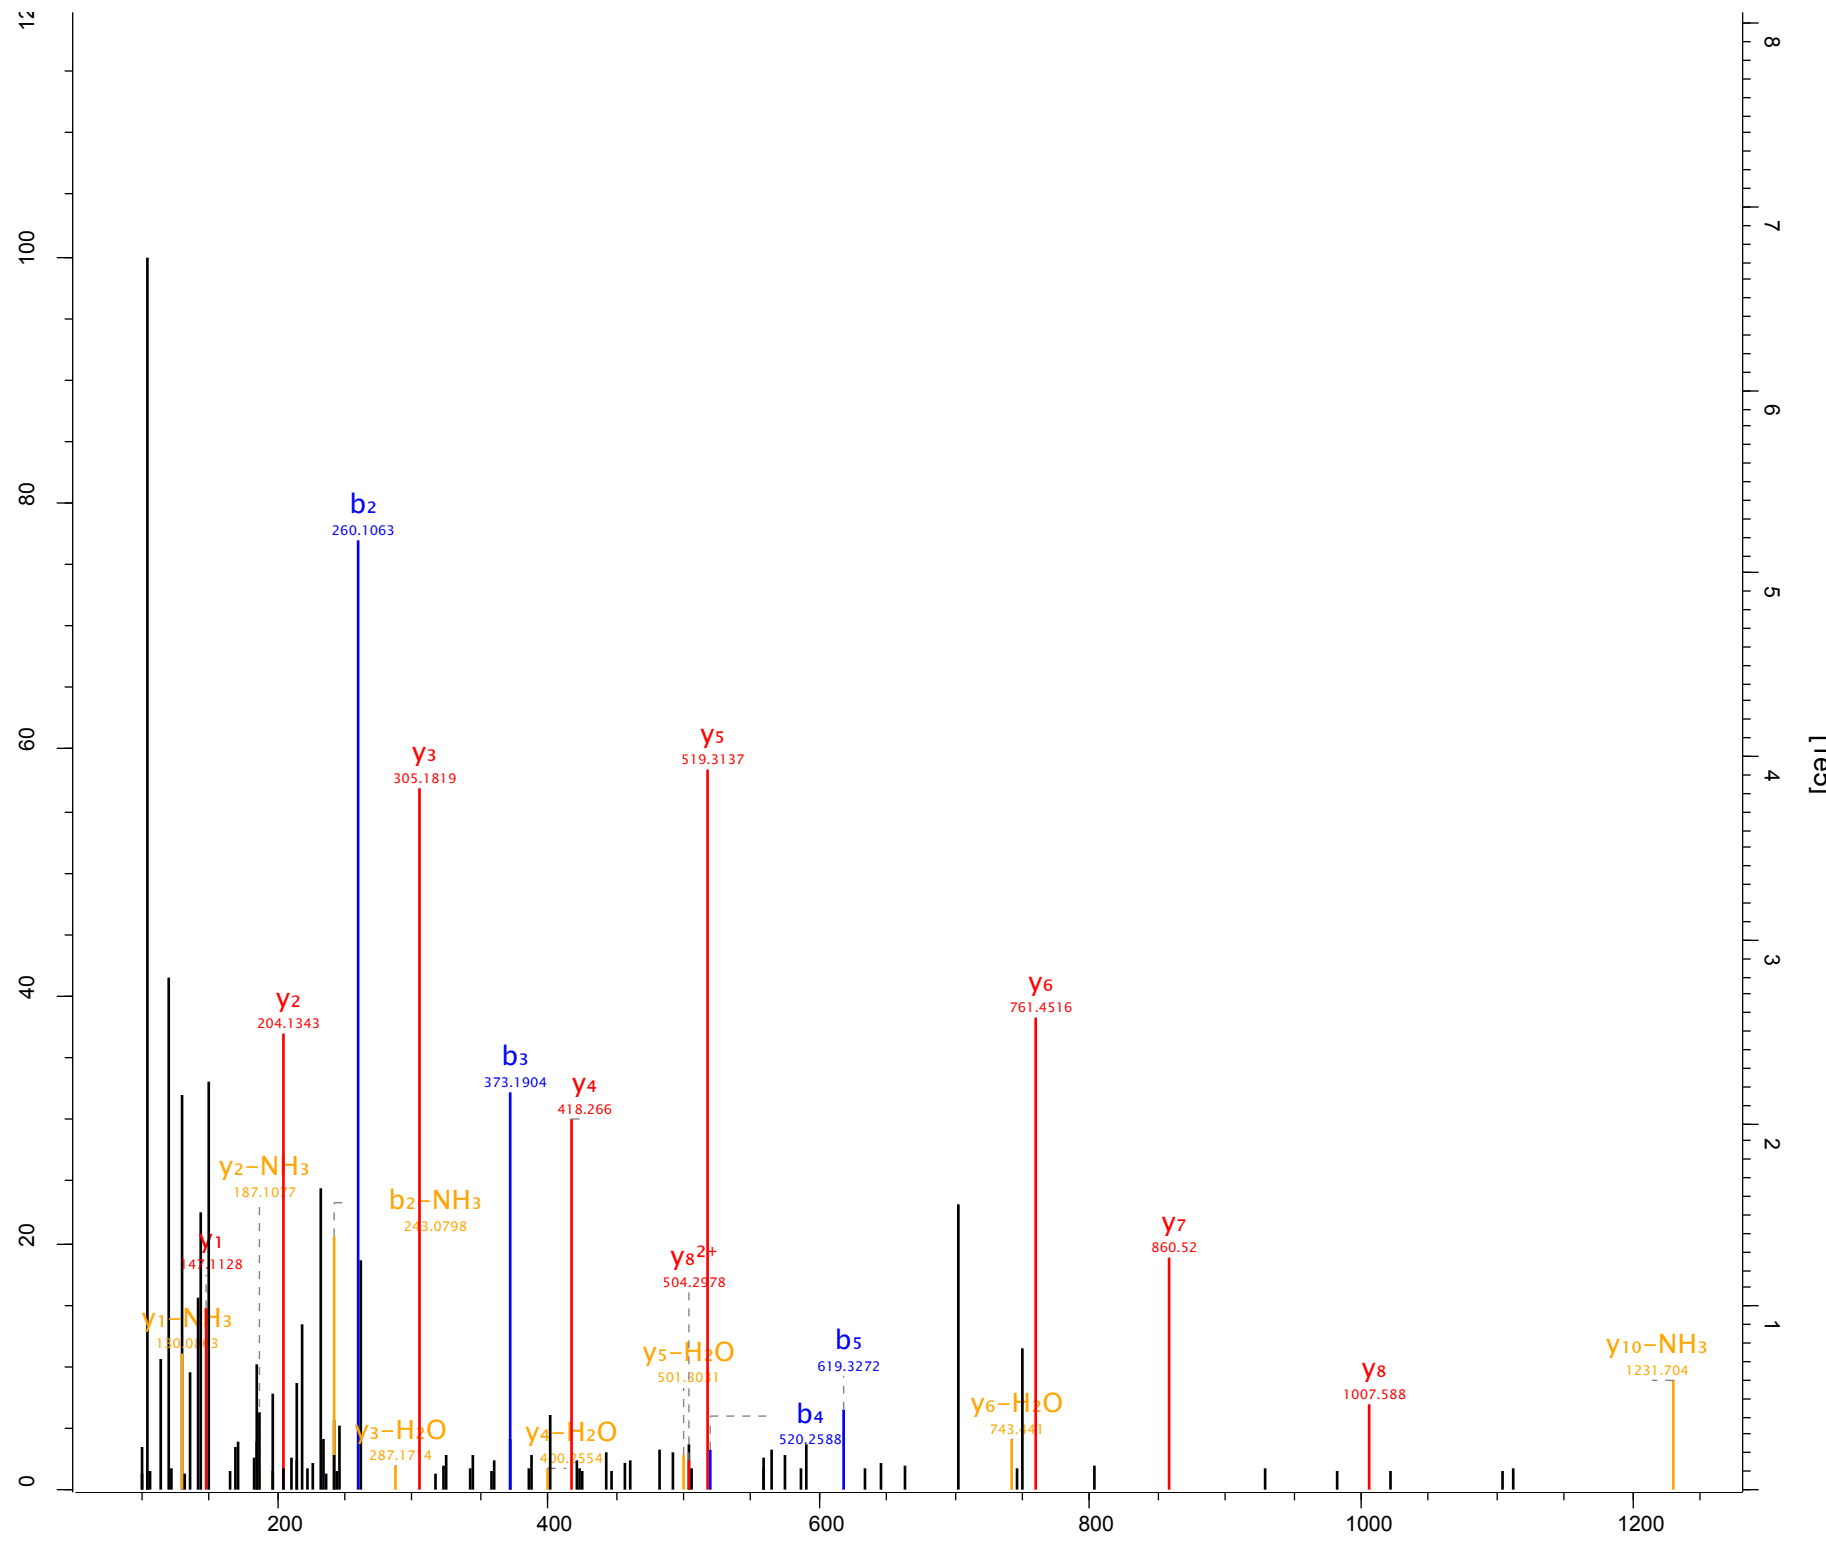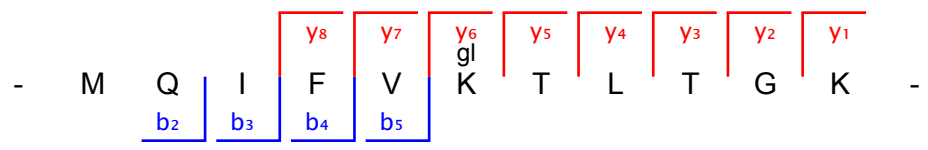

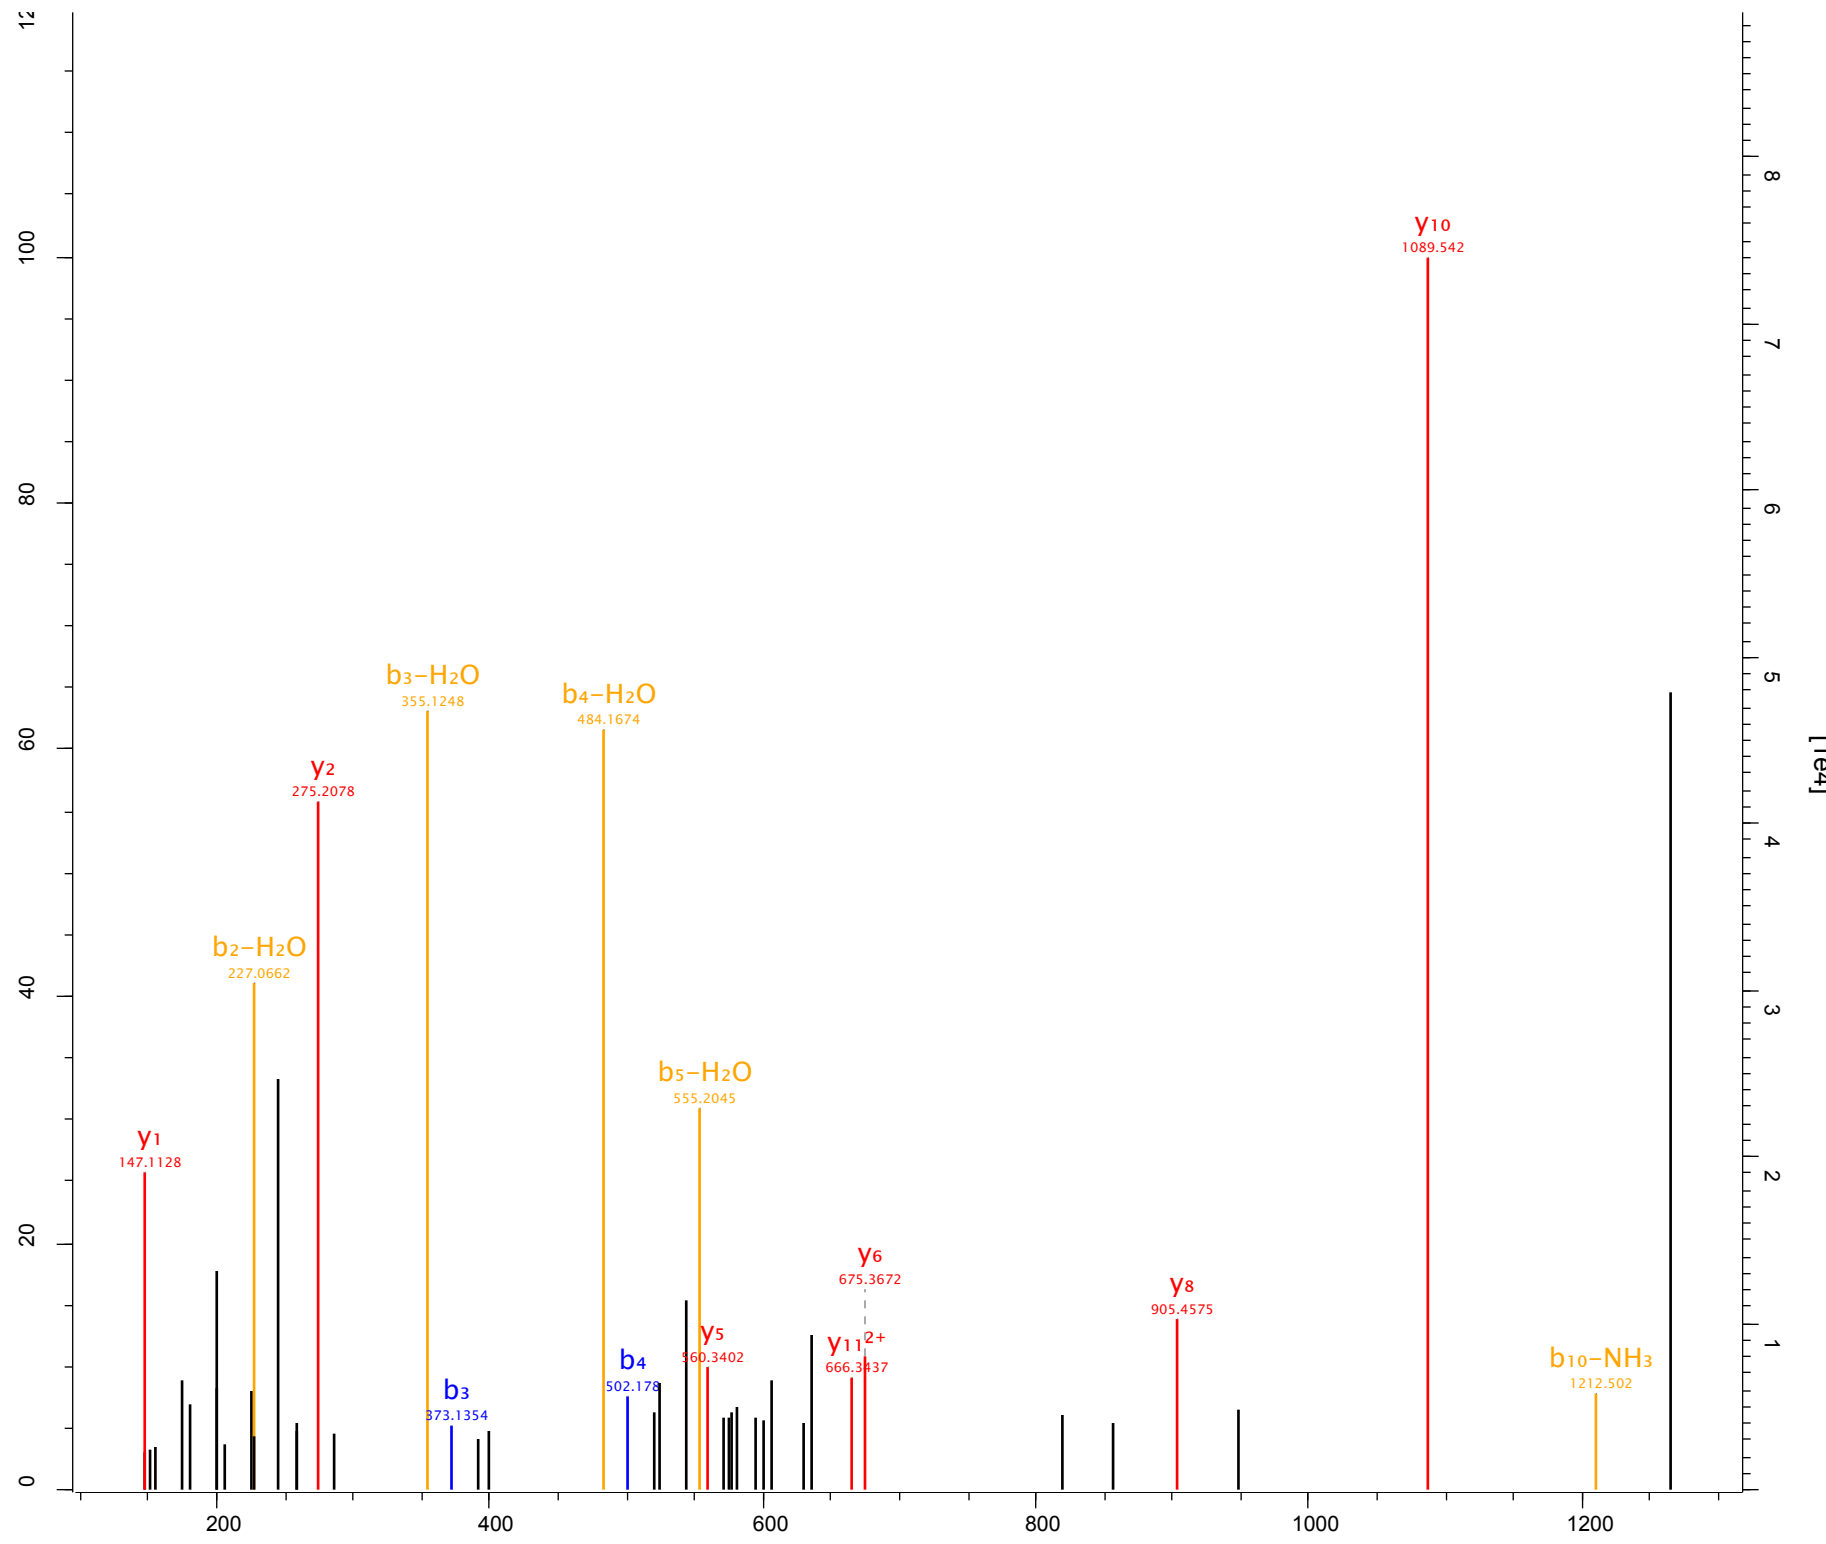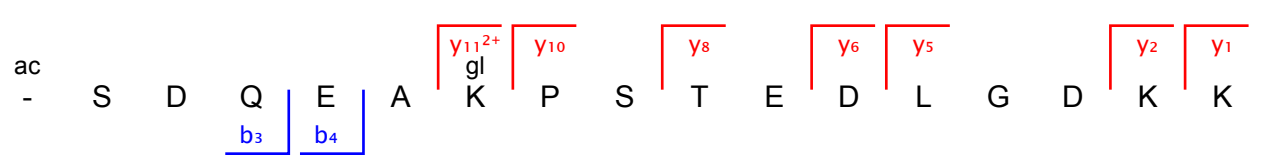

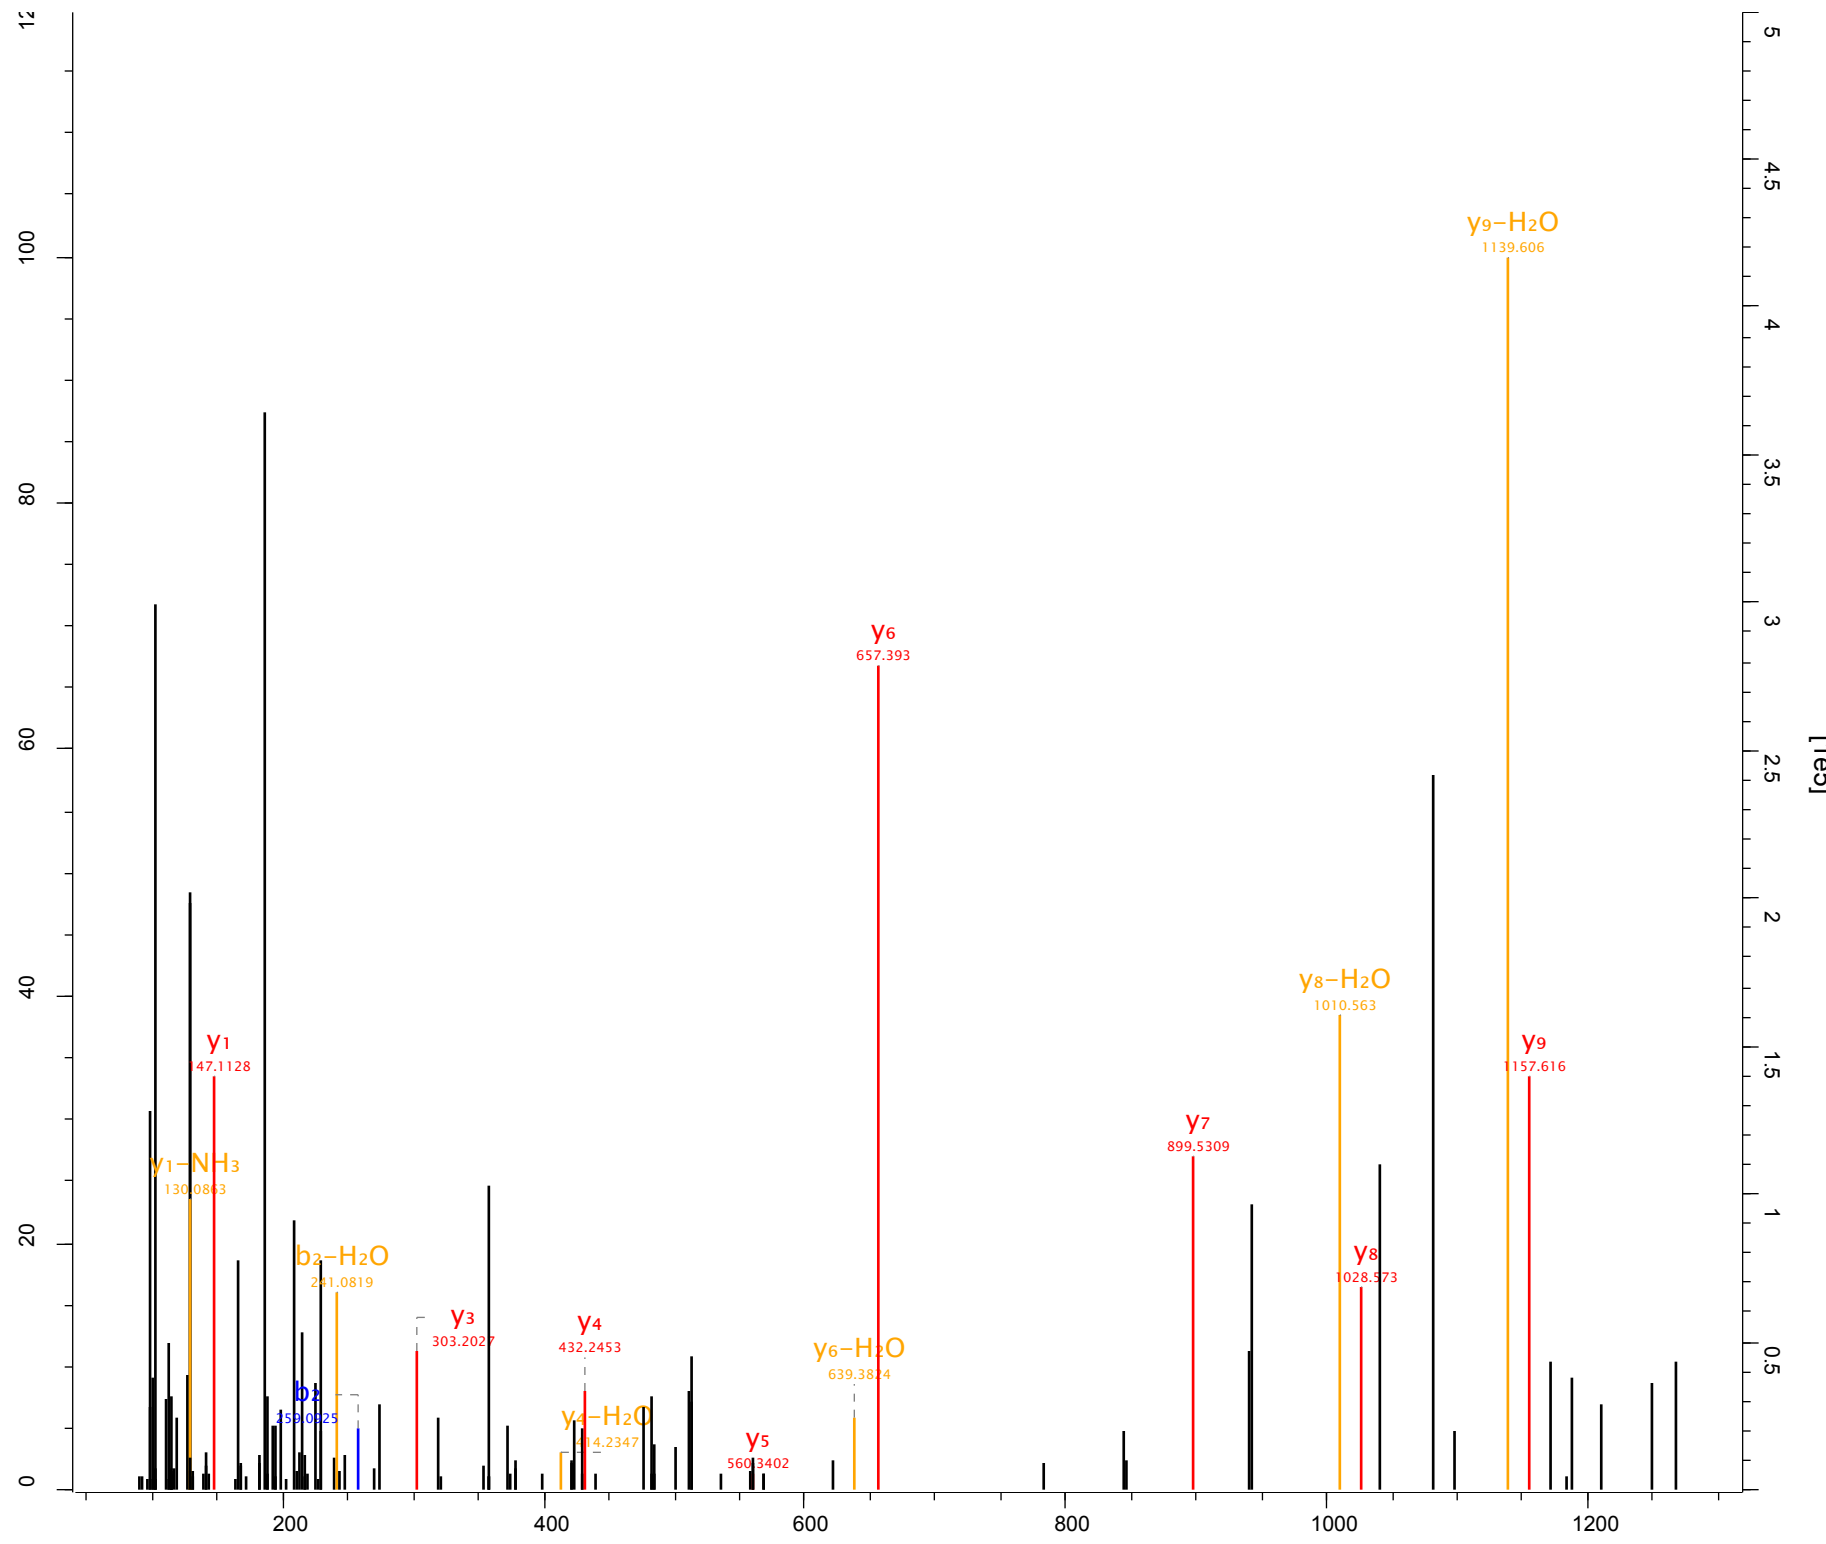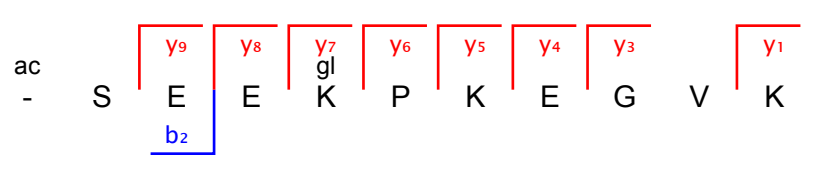



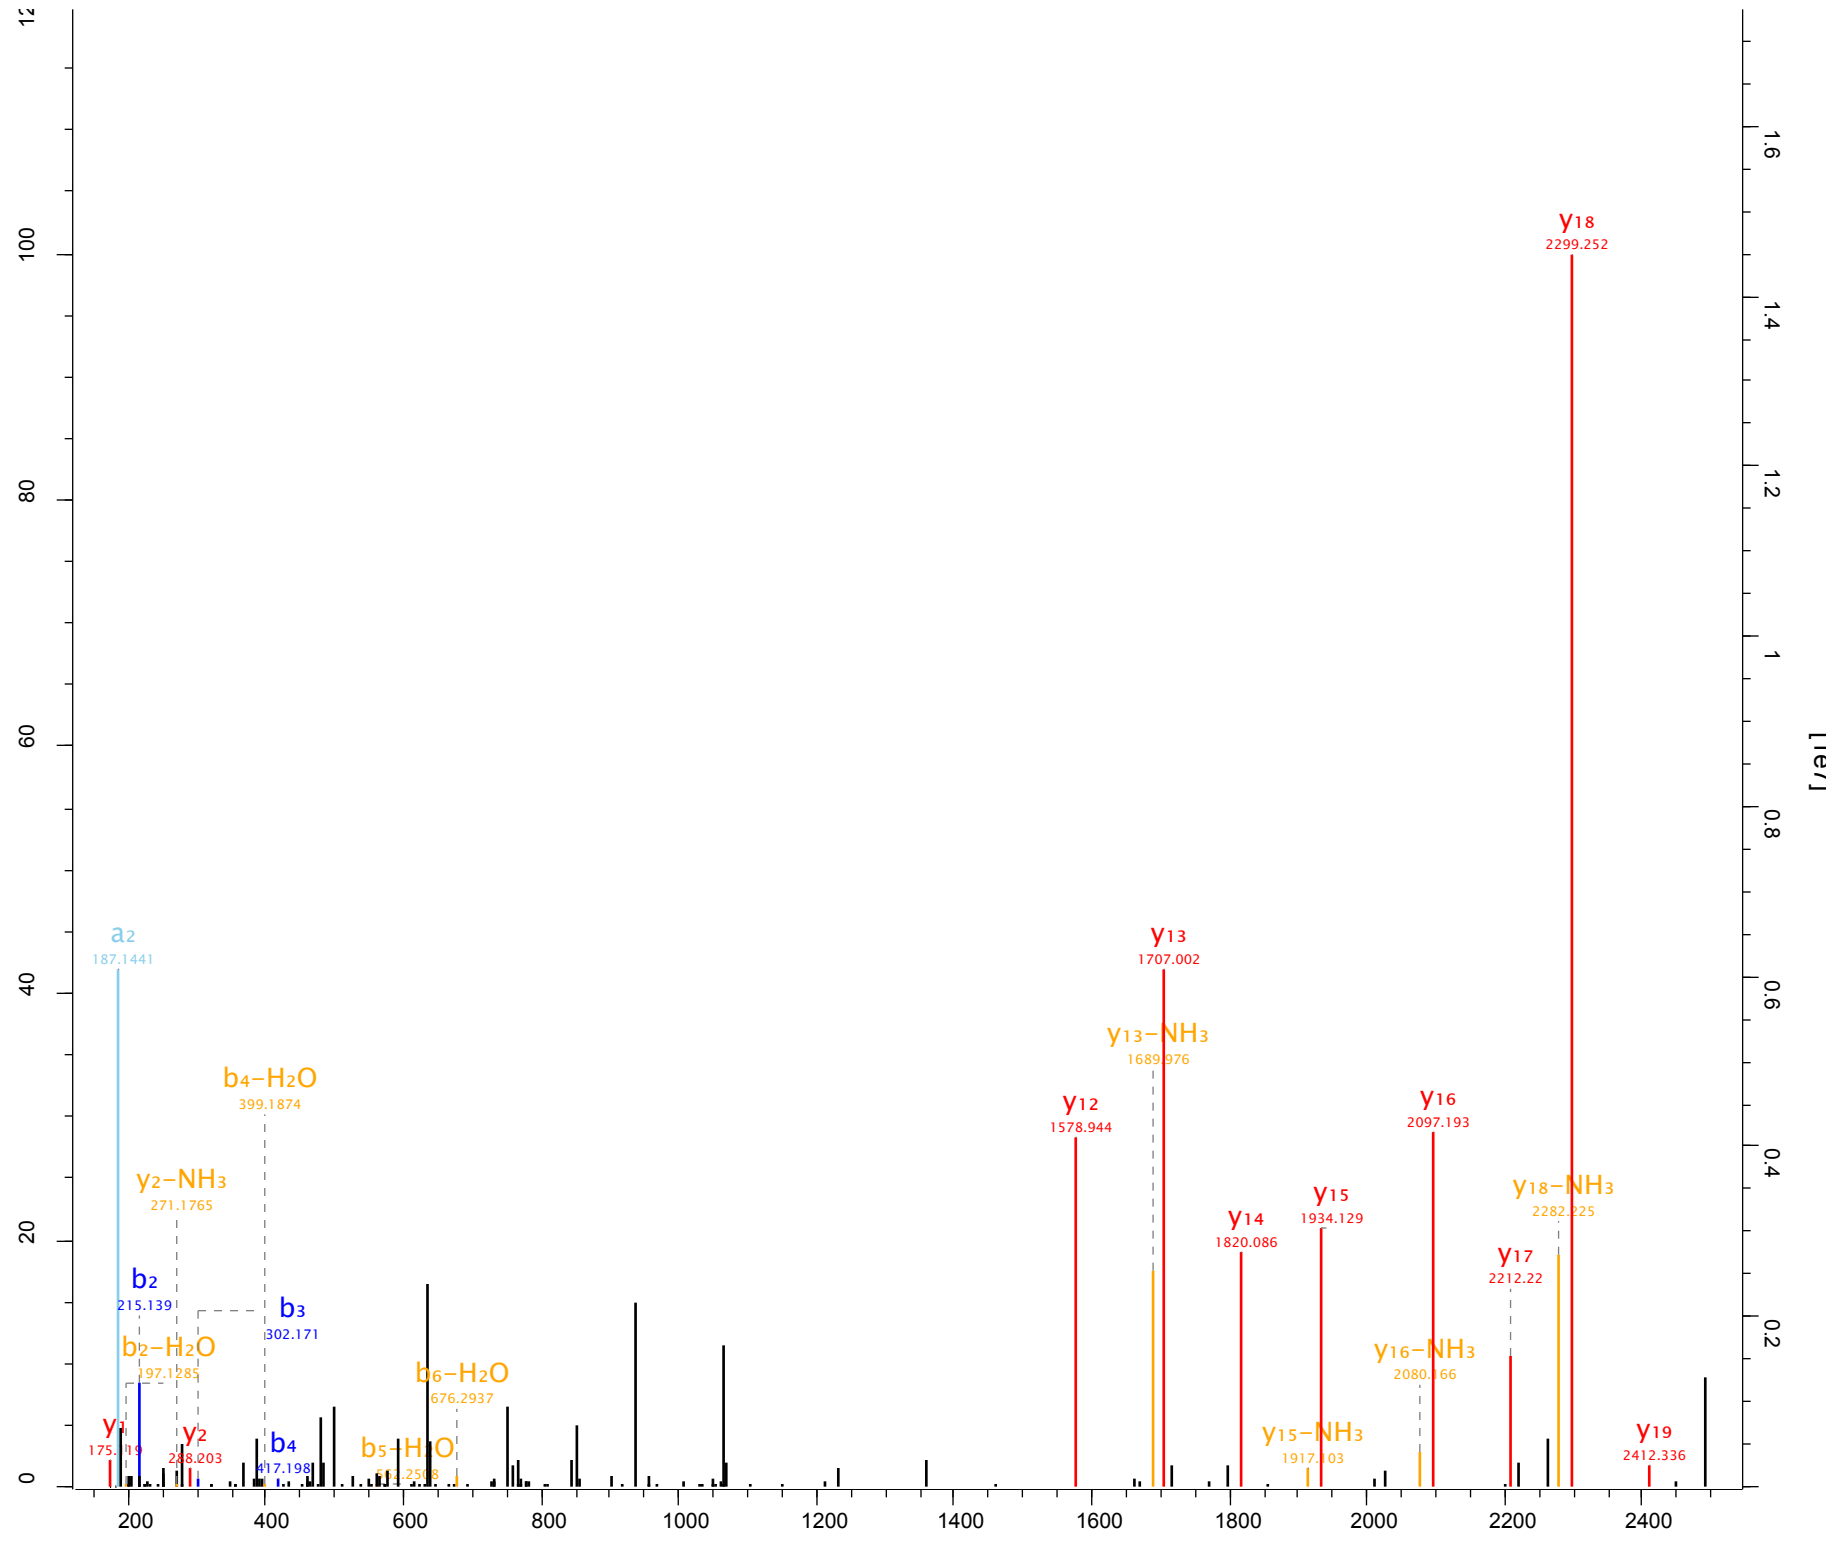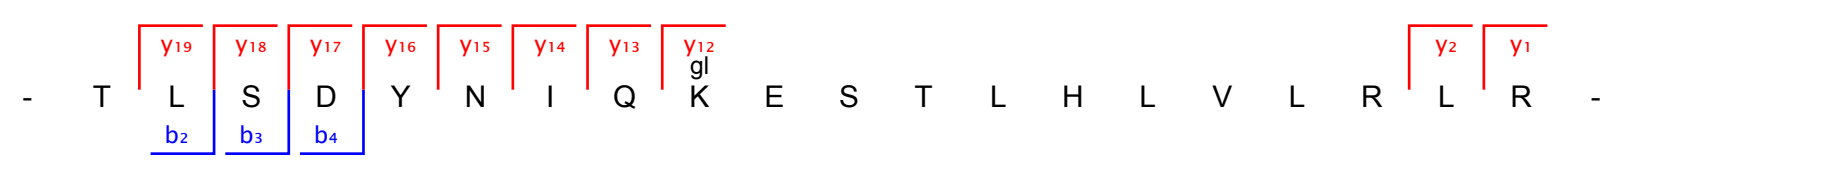

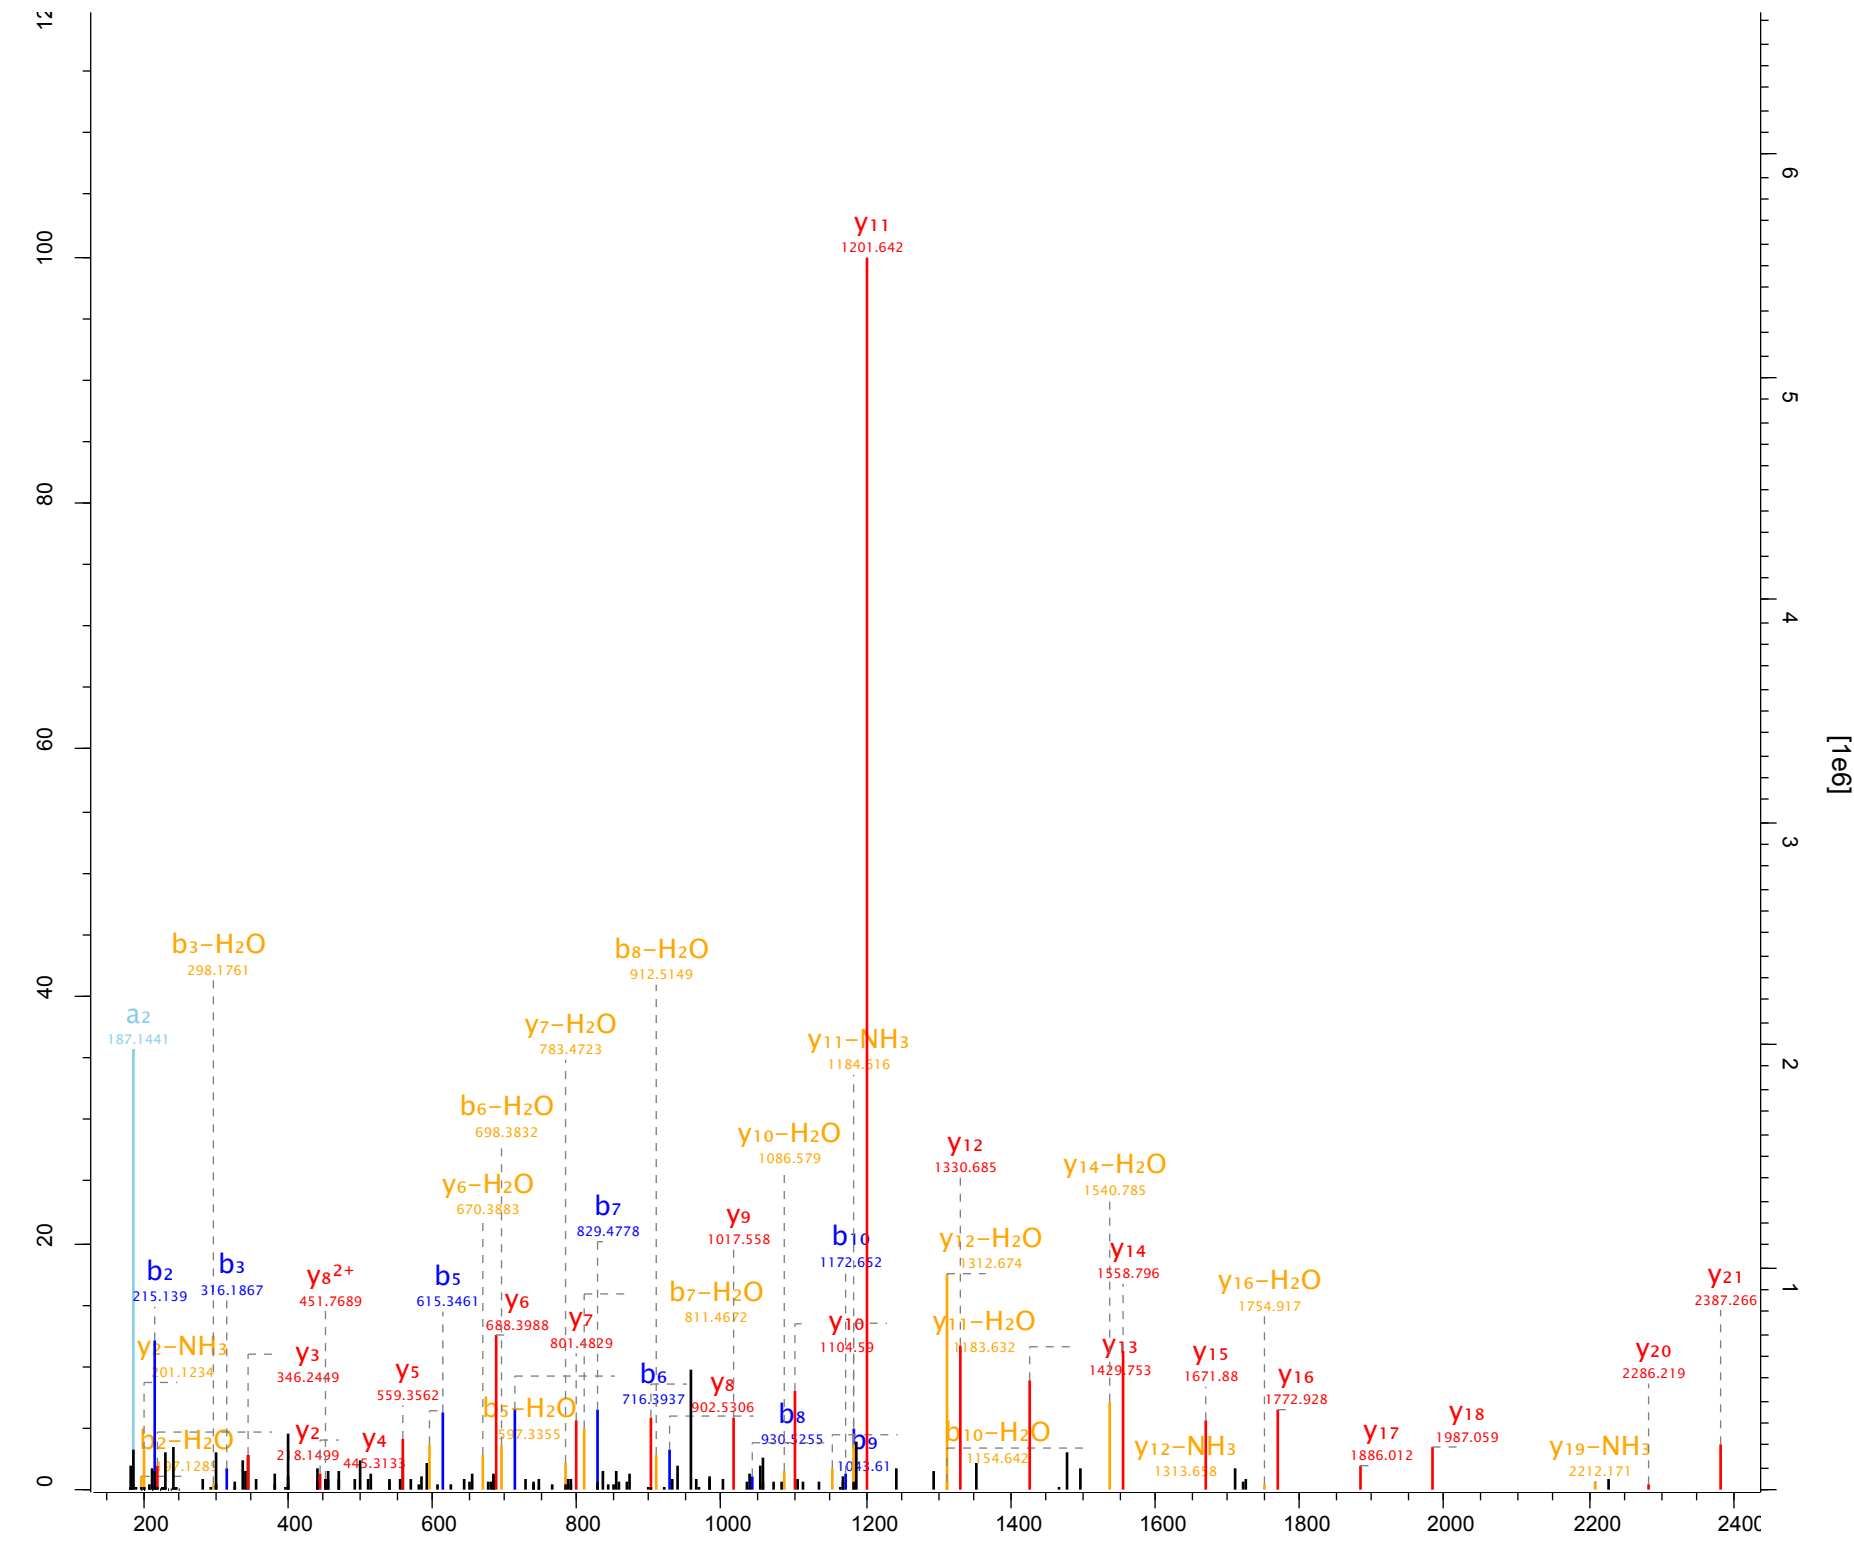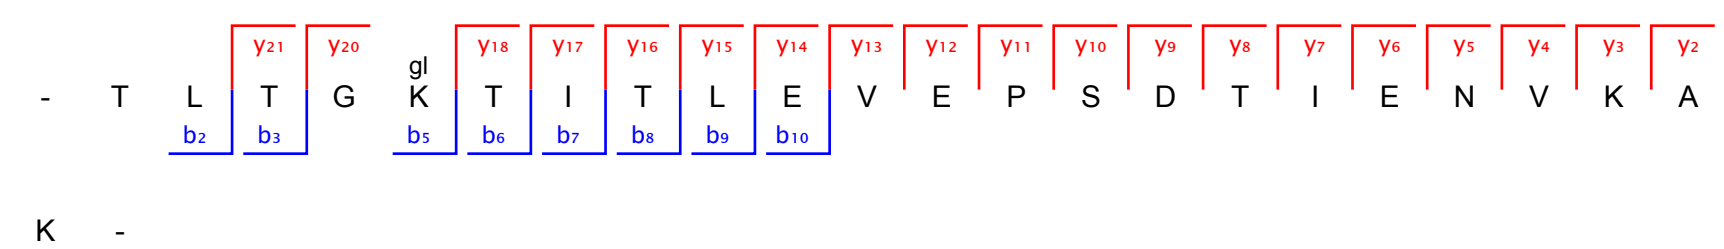



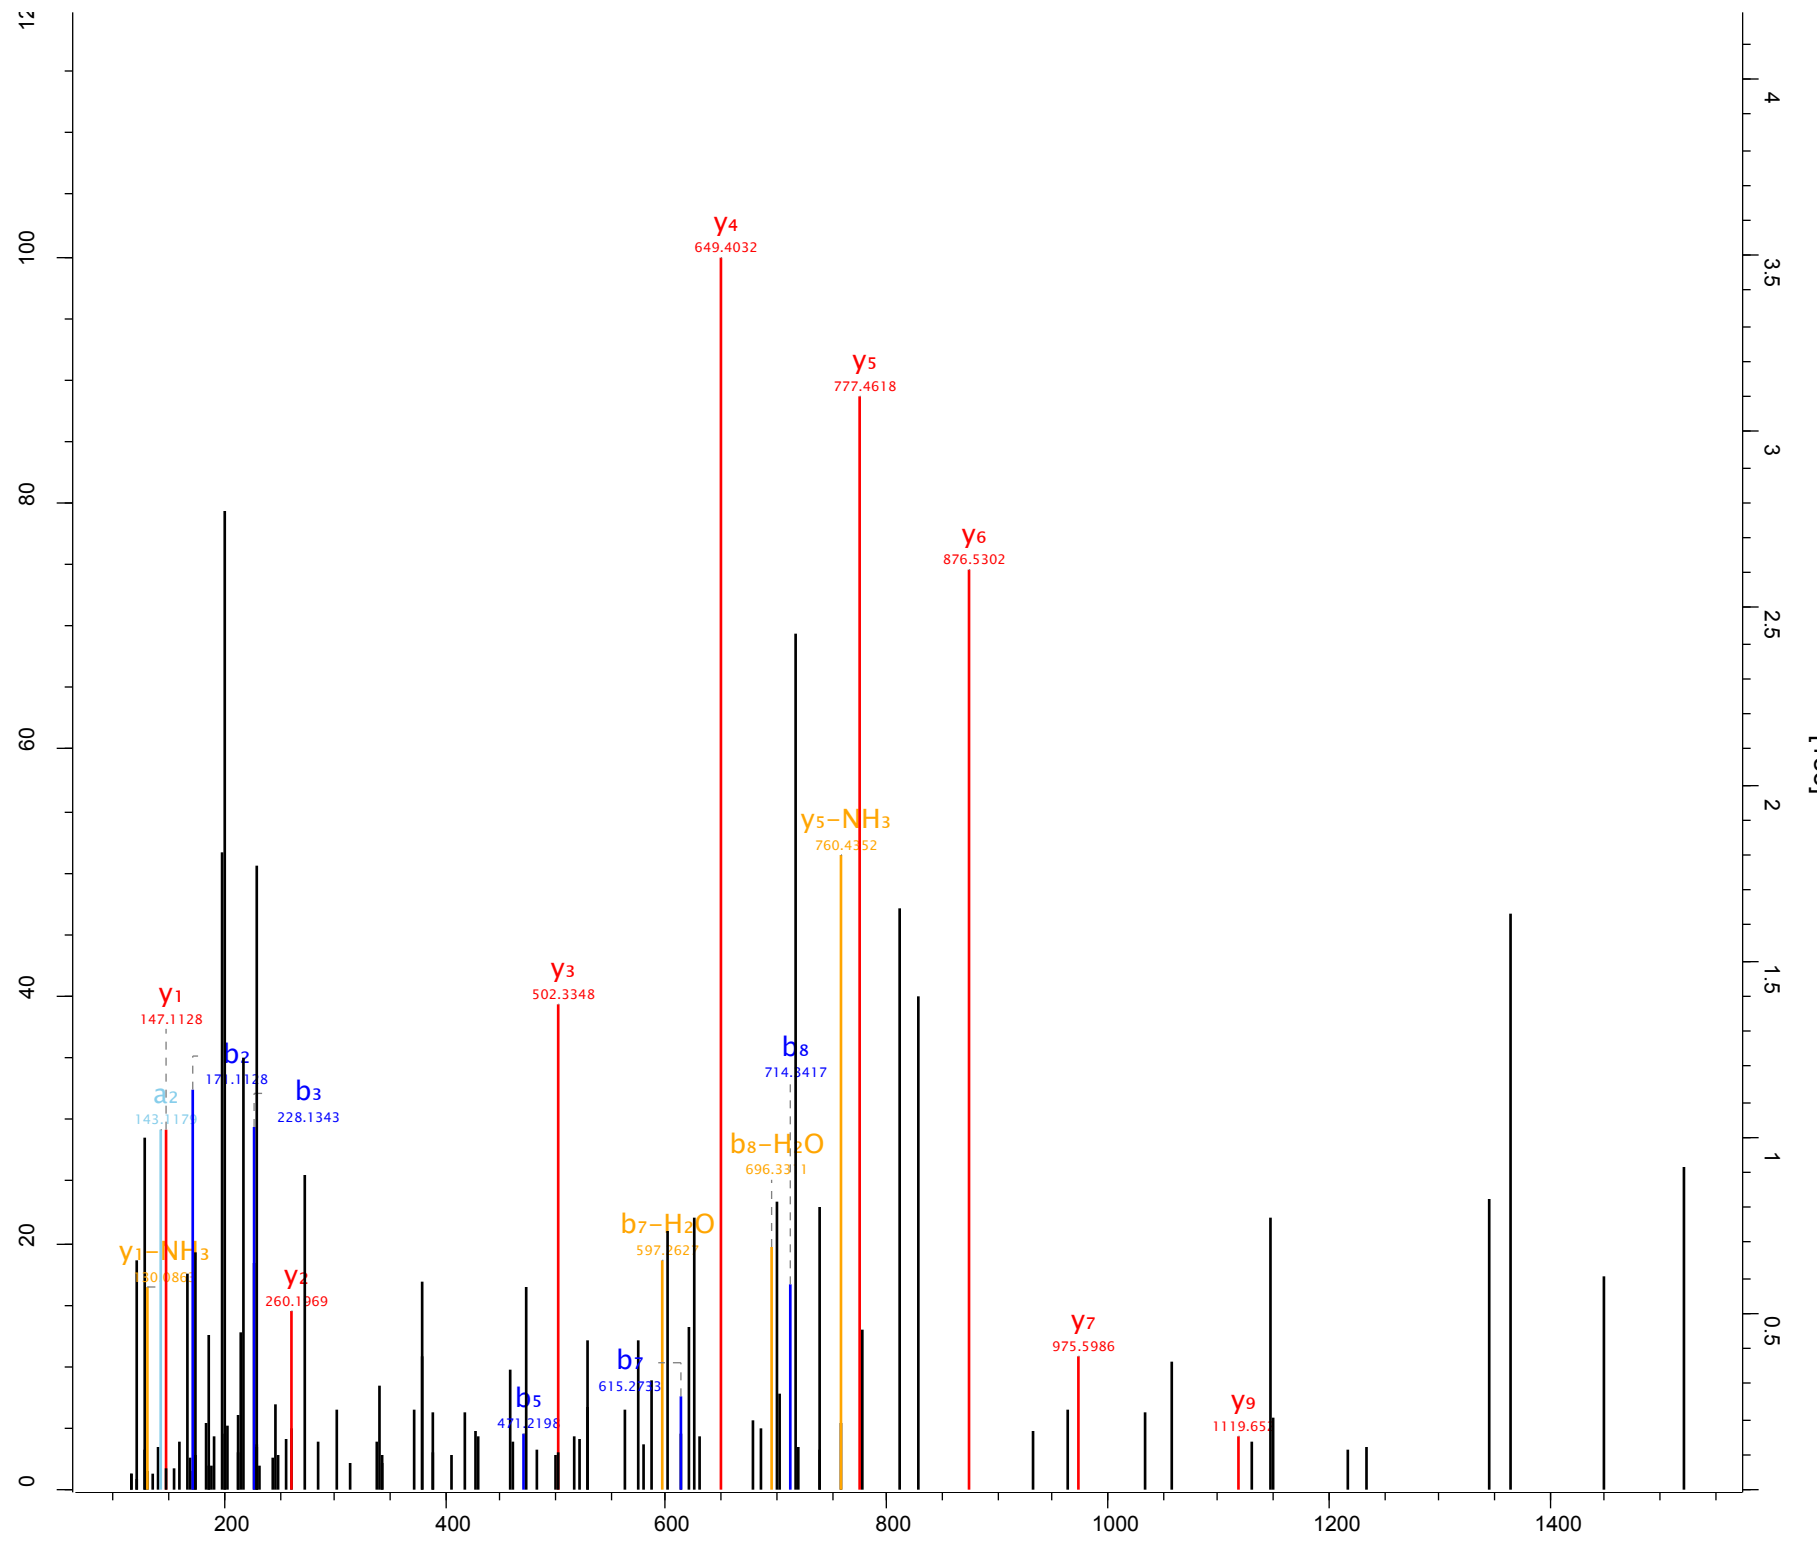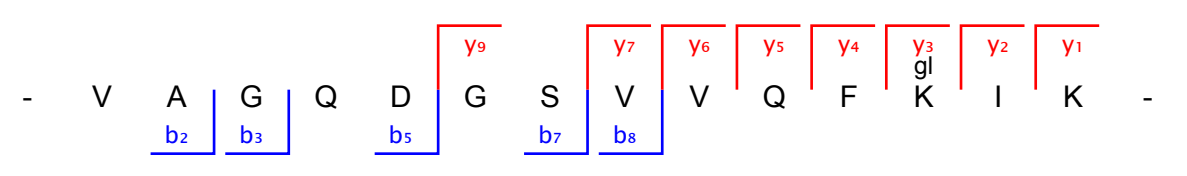

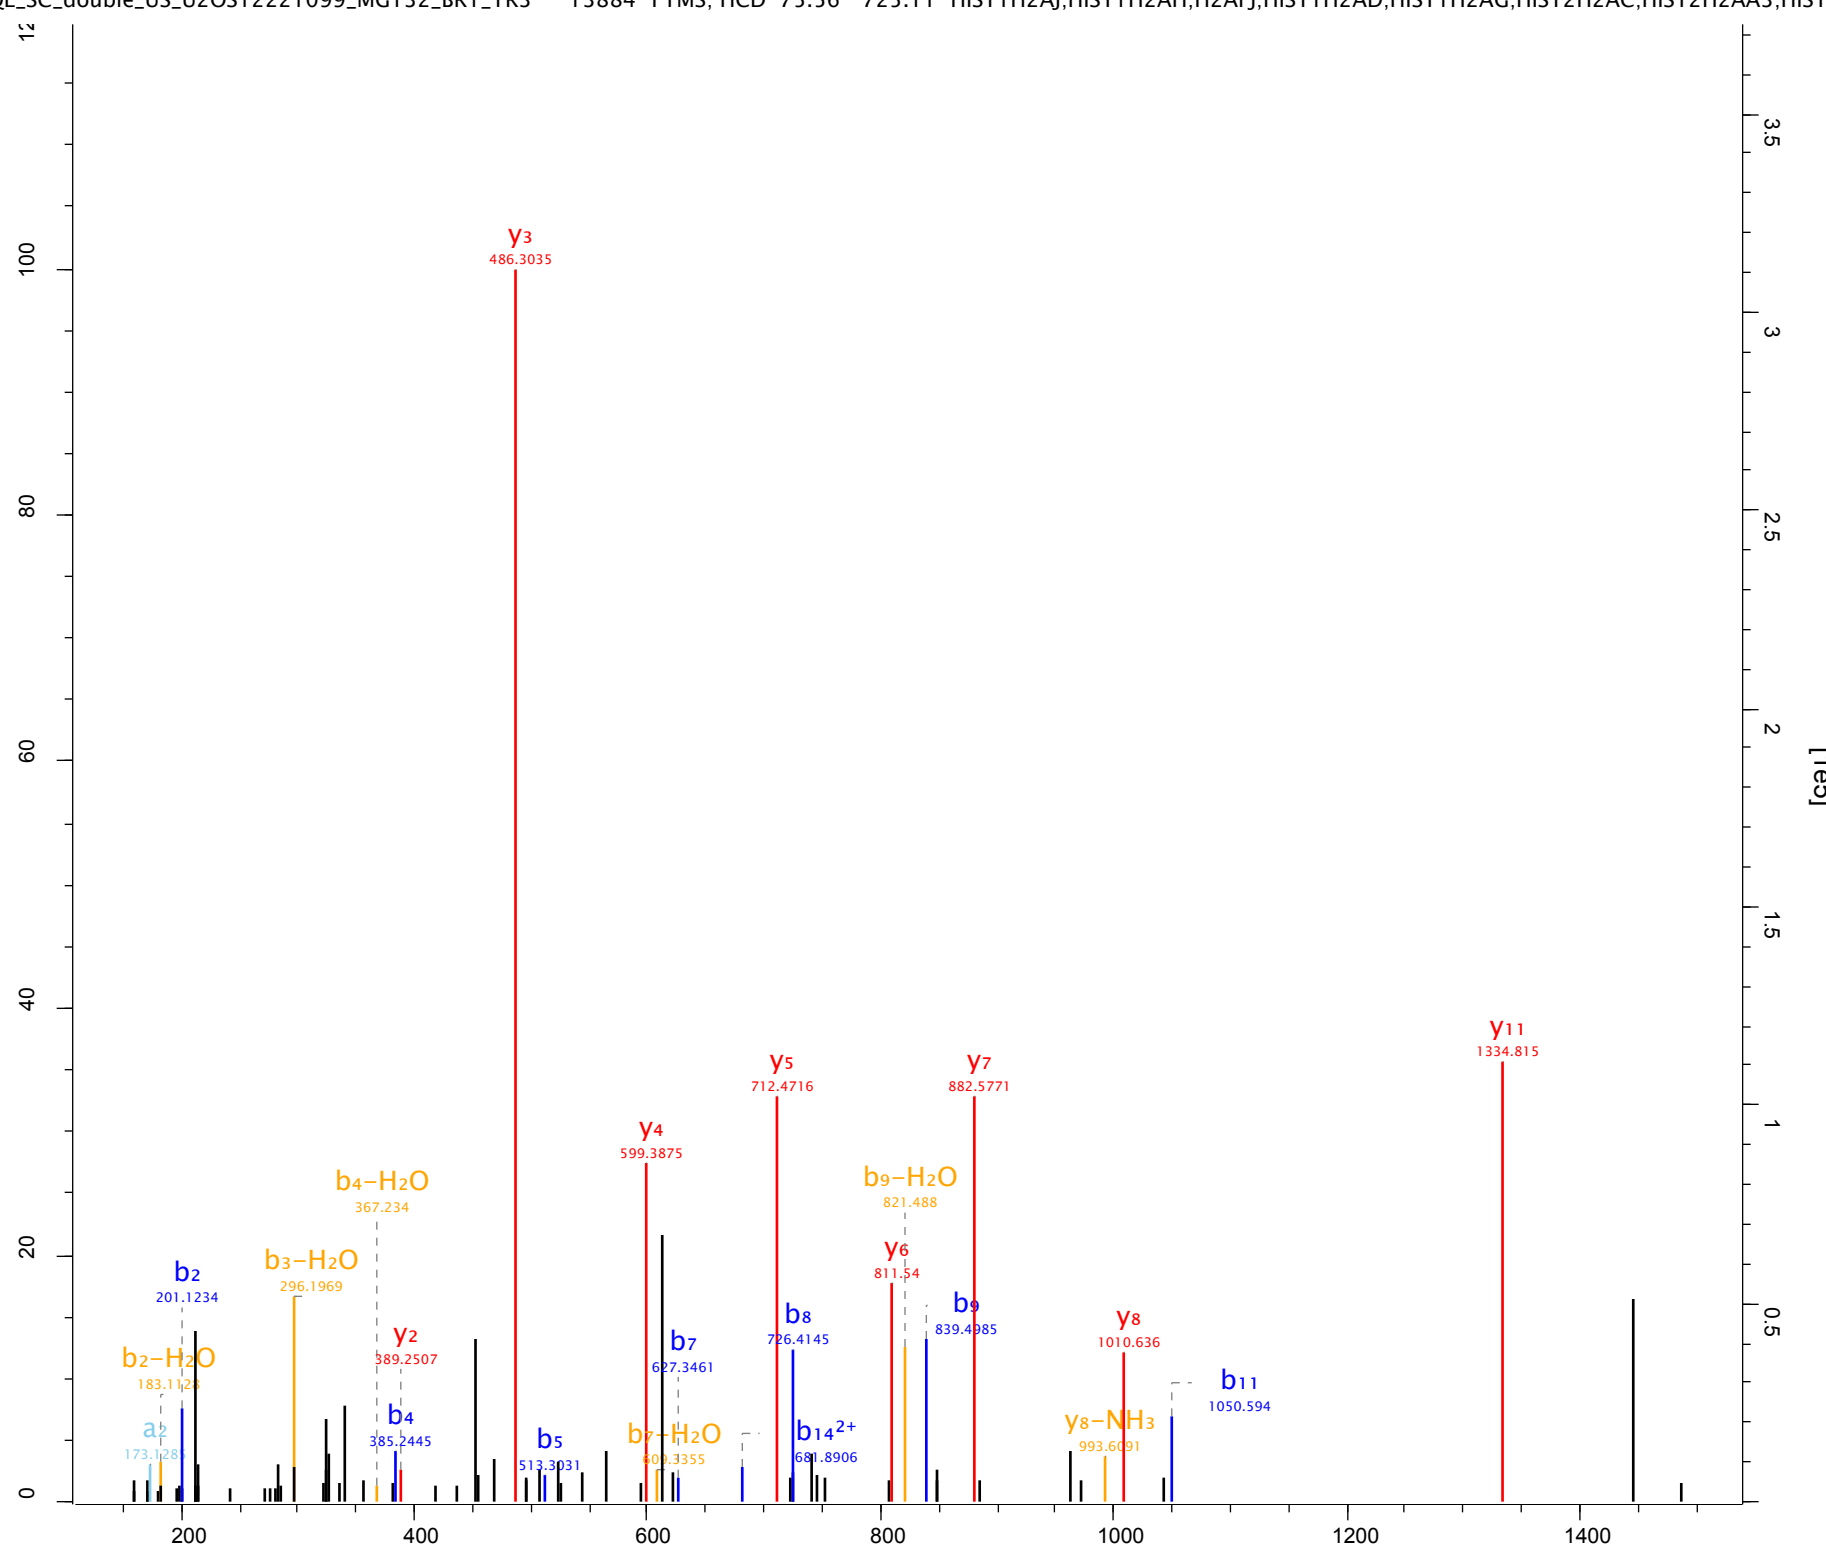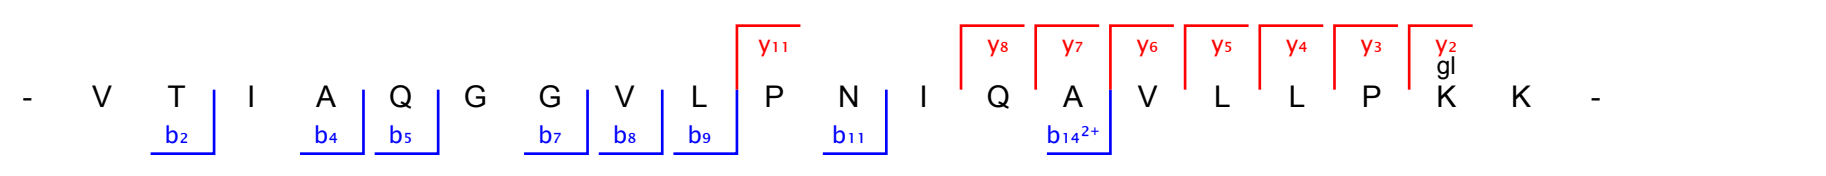

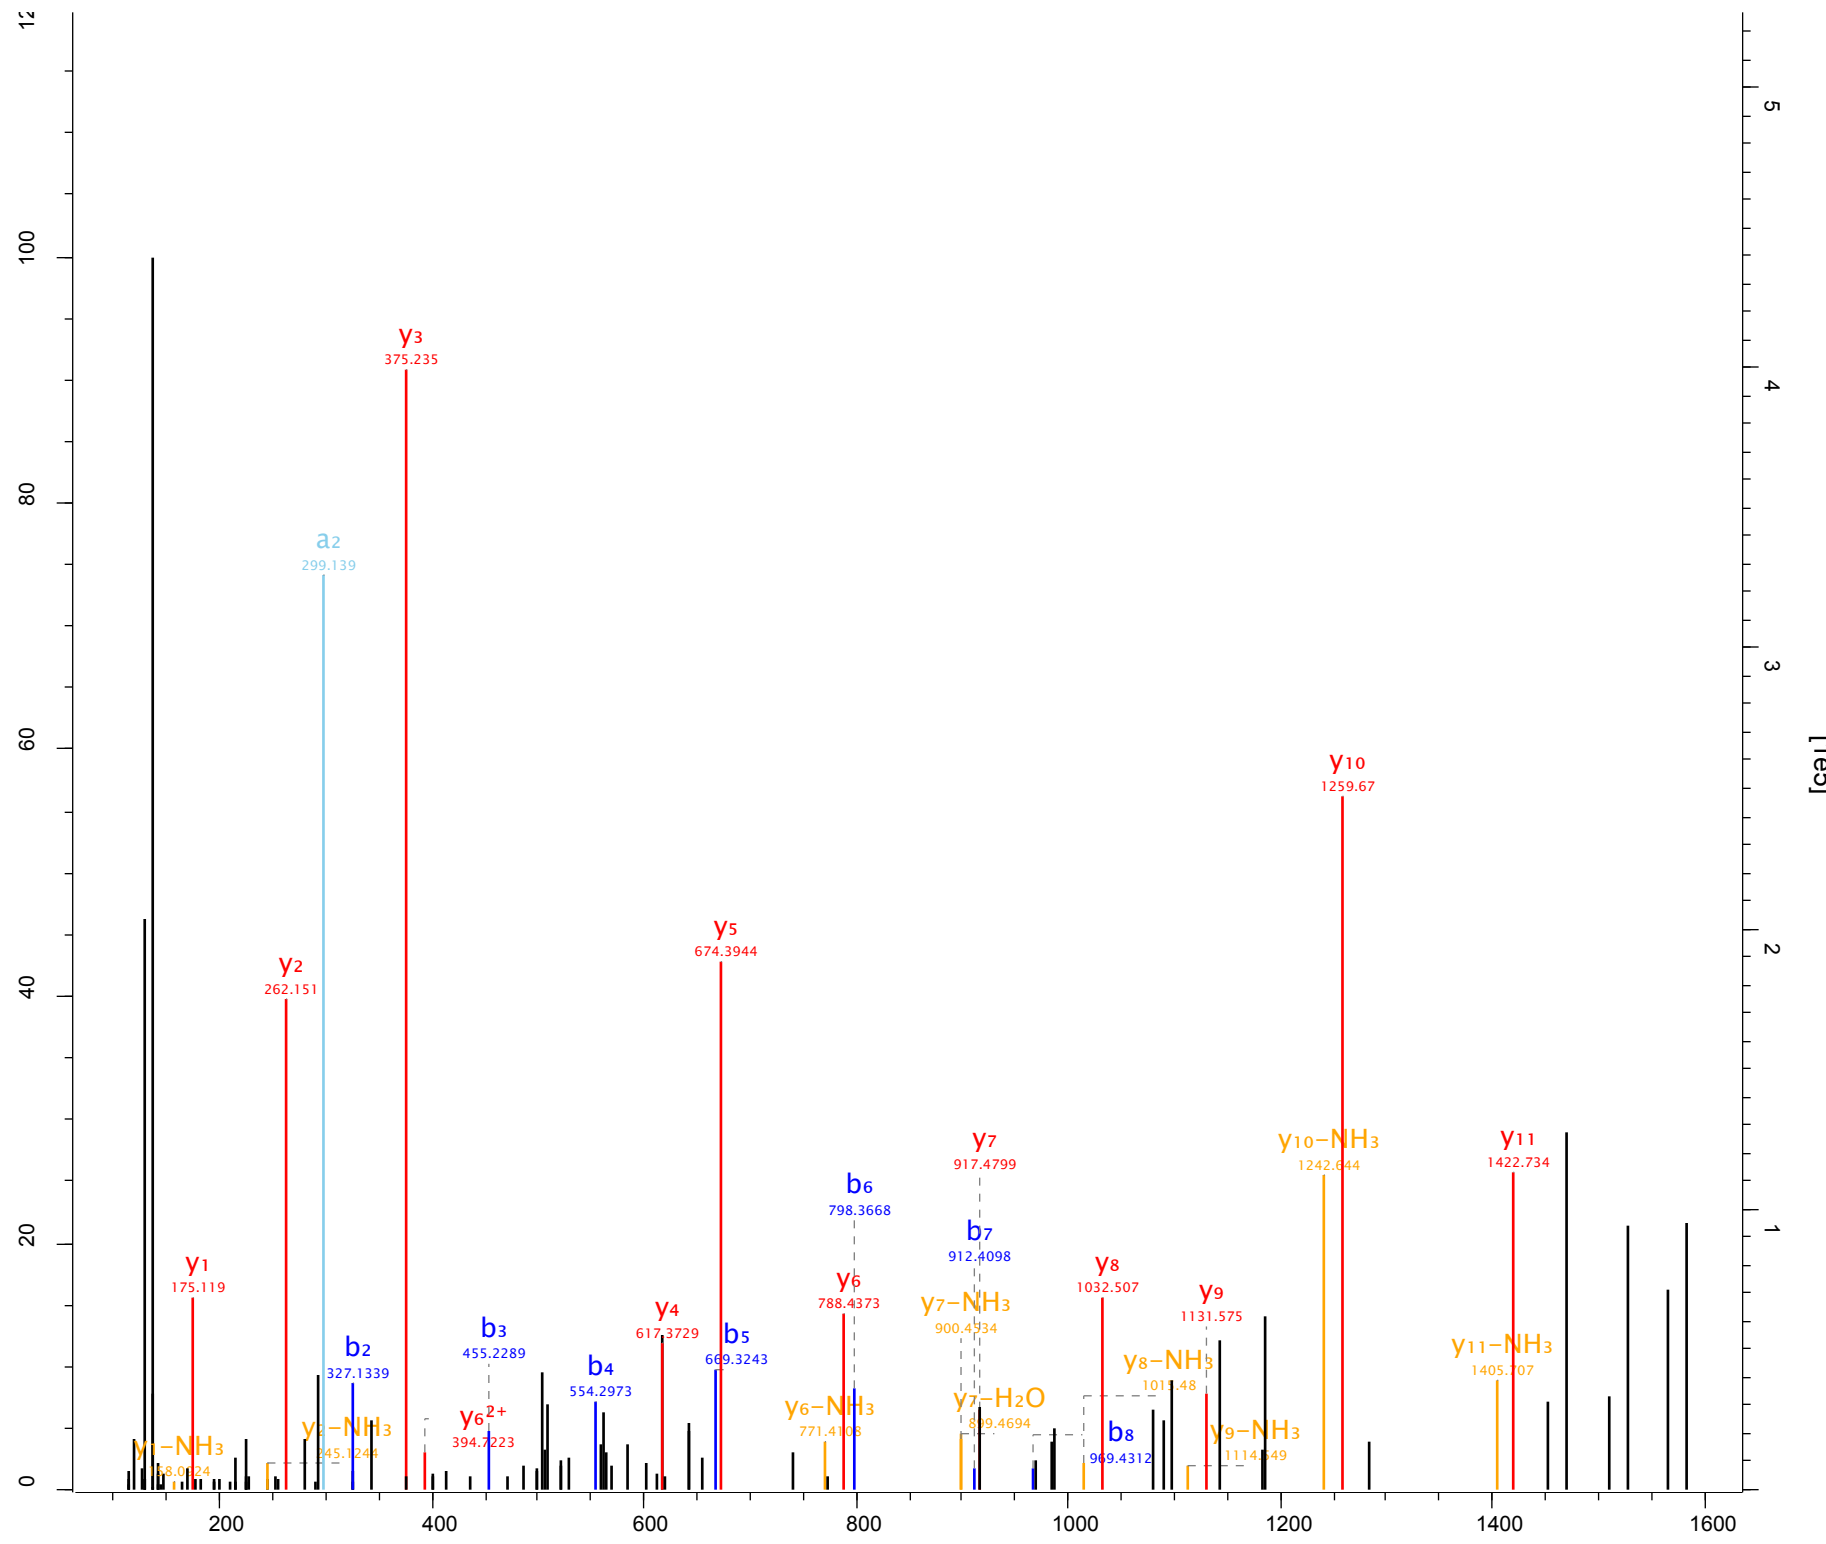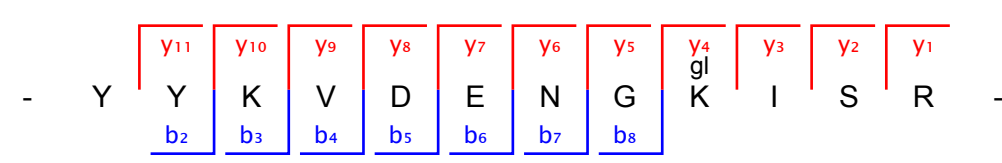

Supplement: supp_TIR117.000152_4742_1_supp_6088_cw7v3b.pdf [file supp_TIR117.000152_4742_1_supp_6088_cw7v3b.pdf]
